# Supplementary material for: Clonality, Antigen Recognition, and Suppression of CD8+ T Cells Differentially Affect Prognosis of Breast Cancer Subtypes
Source: Oxford University Press journal article supplement (doi:10.1158/1078-0432.ccr-19-0285), 2019-10-24
Supplement: 10780432ccr190285-sup-215982_3_supp_5813157_pysghc.xlsx [file 10780432ccr190285-sup-215982_3_supp_5813157_pysghc.xlsx]

## Sheet: TILsignatureGenes-152probes
Probeset ID	Gene Symbol	Gene Title	RefSeq Transcript ID	120 gene signature
1552497_a_at	SLAMF6	SLAM family member 6	NM_001184714 /// NM_001184715 /// NM_001184716 /// NM_052931	no
1555759_a_at	CCL5	chemokine (C-C motif) ligand 5	NM_002985	no
1555779_a_at	CD79A	CD79a molecule, immunoglobulin-associated alpha	NM_001783 /// NM_021601	no
202957_at	HCLS1	hematopoietic cell-specific Lyn substrate 1	NM_005335	yes
203047_at	STK10	serine/threonine kinase 10	NM_005990	yes
203332_s_at	INPP5D	inositol polyphosphate-5-phosphatase, 145kDa	NM_001017915 /// NM_005541	yes
203416_at	CD53	CD53 molecule	NM_000560 /// NM_001040033	yes
203470_s_at	PLEK	pleckstrin	NM_002664	yes
203471_s_at	PLEK	pleckstrin	NM_002664	yes
203879_at	PIK3CD	phosphoinositide-3-kinase, catalytic, delta polypeptide	NM_005026	yes
203923_s_at	CYBB	cytochrome b-245, beta polypeptide	NM_000397	yes
204116_at	IL2RG	interleukin 2 receptor, gamma	NM_000206	yes
204118_at	CD48	CD48 molecule	NM_001778	yes
204153_s_at	MFNG	MFNG O-fucosylpeptide 3-beta-N-acetylglucosaminyltransferase	NM_001166343 /// NM_002405 /// NR_029413	yes
204265_s_at	GPSM3	G-protein signaling modulator 3	NM_022107	yes
204562_at	IRF4	interferon regulatory factor 4	NM_001195286 /// NM_002460 /// NR_036585	yes
204563_at	SELL	selectin L	NM_000655 /// NR_029467	yes
204661_at	CD52	CD52 molecule	NM_001803	yes
204714_s_at	F5	coagulation factor V (proaccelerin, labile factor)	NM_000130	yes
204777_s_at	MAL	mal, T-cell differentiation protein	NM_002371 /// NM_022438 /// NM_022439 /// NM_022440	yes
204890_s_at	LCK	lymphocyte-specific protein tyrosine kinase	NM_001042771 /// NM_005356	yes
204891_s_at	LCK	lymphocyte-specific protein tyrosine kinase	NM_001042771 /// NM_005356	yes
204912_at	IL10RA	interleukin 10 receptor, alpha	NM_001558 /// NR_026691	yes
204923_at	SASH3	SAM and SH3 domain containing 3	NM_018990	yes
204929_s_at	VAMP5	vesicle-associated membrane protein 5 (myobrevin)	NM_006634	yes
204960_at	PTPRCAP	protein tyrosine phosphatase, receptor type, C-associated protein	NM_005608	yes
205147_x_at	NCF4	neutrophil cytosolic factor 4, 40kDa	NM_000631 /// NM_013416	yes
205159_at	CSF2RB	colony stimulating factor 2 receptor, beta, low-affinity (granulocyte-macrophage	NM_000395	yes
205213_at	ACAP1	ArfGAP with coiled-coil, ankyrin repeat and PH domains 1	NM_014716	yes
205270_s_at	LCP2	lymphocyte cytosolic protein 2 (SH2 domain containing leukocyte protein of 76kDa	NM_005565	yes
205291_at	IL2RB	interleukin 2 receptor, beta	NM_000878	yes
205456_at	CD3E	CD3e molecule, epsilon (CD3-TCR complex)	NM_000733	yes
205484_at	SIT1	signaling threshold regulating transmembrane adaptor 1	NM_014450	yes
205685_at	CD86	CD86 molecule	NM_006889 /// NM_175862	yes
205692_s_at	CD38	CD38 molecule	NM_001775	yes
205758_at	CD8A	CD8a molecule	NM_001145873 /// NM_001768 /// NM_171827 /// NR_027353	yes
205798_at	IL7R	interleukin 7 receptor	NM_002185	yes
205804_s_at	TRAF3IP3	TRAF3 interacting protein 3	NM_025228	yes
205821_at	KLRK1	killer cell lectin-like receptor subfamily K, member 1	NM_007360	yes
205831_at	CD2	CD2 molecule	NM_001767	yes
206118_at	STAT4	signal transducer and activator of transcription 4	NM_003151	yes
206150_at	CD27	CD27 molecule	NM_001242	yes
206181_at	SLAMF1	signaling lymphocytic activation molecule family member 1	NM_003037	yes
206337_at	CCR7	chemokine (C-C motif) receptor 7	NM_001838	yes
206366_x_at	XCL1	chemokine (C motif) ligand 1	NM_002995	yes
206545_at	CD28	CD28 molecule	NM_006139	yes
206666_at	GZMK	granzyme K (granzyme 3; tryptase II)	NM_002104	yes
206707_x_at	FAM65B	family with sequence similarity 65, member B	NM_014722 /// NM_015864	yes
206804_at	CD3G	CD3g molecule, gamma (CD3-TCR complex)	NM_000073	yes
206978_at	CCR2	chemokine (C-C motif) receptor 2	NM_001123041 /// NM_001123396	yes
207238_s_at	PTPRC	protein tyrosine phosphatase, receptor type, C	NM_002838 /// NM_080921 /// NM_080923	yes
207651_at	GPR171	G protein-coupled receptor 171	NM_013308	yes
207734_at	LAX1	lymphocyte transmembrane adaptor 1	NM_001136190 /// NM_017773	yes
207795_s_at	KLRD1	killer cell lectin-like receptor subfamily D, member 1	NM_001114396 /// NM_002262 /// NM_007334	yes
209083_at	CORO1A	coronin, actin binding protein, 1A	NM_001193333 /// NM_007074	yes
209374_s_at	IGHM	immunoglobulin heavy constant mu	---	yes
209670_at	TRAC	T cell receptor alpha constant	---	yes
209671_x_at	TRAC	T cell receptor alpha constant	---	yes
209685_s_at	PRKCB	protein kinase C, beta	NM_002738 /// NM_212535	yes
209734_at	NCKAP1L	NCK-associated protein 1-like	NM_001184976 /// NM_005337	yes
209813_x_at	TARP	TCR gamma alternate reading frame protein	NM_001003799 /// NM_001003806	yes
209827_s_at	IL16	interleukin 16 (lymphocyte chemoattractant factor)	NM_001172128 /// NM_004513 /// NM_172217	yes
209879_at	SELPLG	selectin P ligand	NM_003006	yes
209995_s_at	TCL1A	T-cell leukemia/lymphoma 1A	NM_001098725 /// NM_021966	yes
210031_at	CD247	CD247 molecule	NM_000734 /// NM_198053	yes
210038_at	PRKCQ	protein kinase C, theta	NM_006257	yes
210116_at	SH2D1A	SH2 domain containing 1A	NM_001114937 /// NM_002351	yes
210140_at	CST7	cystatin F (leukocystatin)	NM_003650	yes
210279_at	GPR18	G protein-coupled receptor 18	NM_001098200 /// NM_005292	yes
210356_x_at	MS4A1	membrane-spanning 4-domains, subfamily A, member 1	NM_021950 /// NM_152866	yes
210370_s_at	LY9	lymphocyte antigen 9	NM_001033667 /// NM_002348	yes
210439_at	ICOS	inducible T-cell co-stimulator	NM_012092	yes
210785_s_at	C1orf38	chromosome 1 open reading frame 38	NM_001039477 /// NM_001105556 /// NM_004848	yes
210915_x_at	TRBC1	T cell receptor beta constant 1	---	yes
210972_x_at	TRAC /// TRAJ17 /// TRAV20	T cell receptor alpha constant /// T cell receptor alpha joining 17 /// T cell r	---	yes
211005_at	LAT /// SPNS1	linker for activation of T cells /// spinster homolog 1 (Drosophila)	NM_001014987 /// NM_001014988 /// NM_001014989 /// NM_001142448 /// NM_001142449	yes
211144_x_at	TARP /// TRGC2	TCR gamma alternate reading frame protein /// T cell receptor gamma constant 2	NM_001003799 /// NM_001003806	yes
211336_x_at	LILRB1	leukocyte immunoglobulin-like receptor, subfamily B (with TM and ITIM domains),	NM_001081637 /// NM_001081638 /// NM_001081639 /// NM_006669	yes
211339_s_at	ITK	IL2-inducible T-cell kinase	NM_005546	yes
211582_x_at	LST1	leukocyte specific transcript 1	NM_001166538 /// NM_007161 /// NM_205837 /// NM_205838 /// NM_205839 /// NM_2058	yes
211634_x_at	IGHM /// LOC100133862	immunoglobulin heavy constant mu /// ig heavy chain V-I region V35-like	---	yes
211635_x_at	IGHA1 /// IGHA2 /// IGHD /// IGHG1 /// IGHG3 /// IGHG4 /// IGHM /// IGHV4-31 /// LOC100133862	immunoglobulin heavy constant alpha 1 /// immunoglobulin heavy constant alpha 2	---	yes
211640_x_at	IGHG1 /// IGHM /// LOC100133862	immunoglobulin heavy constant gamma 1 (G1m marker) /// immunoglobulin heavy cons	---	yes
211742_s_at	EVI2B	ecotropic viral integration site 2B	NM_006495	yes
211796_s_at	TRBC1 /// TRBC2	T cell receptor beta constant 1 /// T cell receptor beta constant 2	---	yes
212414_s_at	GLYR1 /// SEPT6	glyoxylate reductase 1 homolog (Arabidopsis) /// septin 6	NM_015129 /// NM_032569 /// NM_145799 /// NM_145800 /// NM_145802	yes
212827_at	IGHM	immunoglobulin heavy constant mu	---	yes
213160_at	DOCK2	dedicator of cytokinesis 2	NM_004946	yes
213193_x_at	TRBC1	T cell receptor beta constant 1	---	yes
213416_at	ITGA4	integrin, alpha 4 (antigen CD49D, alpha 4 subunit of VLA-4 receptor)	NM_000885	yes
213539_at	CD3D	CD3d molecule, delta (CD3-TCR complex)	NM_000732 /// NM_001040651	yes
213958_at	CD6	CD6 molecule	NM_006725	yes
214054_at	DOK2	docking protein 2, 56kDa	NM_003974	yes
214228_x_at	TNFRSF4	tumor necrosis factor receptor superfamily, member 4	NM_003327	yes
214567_s_at	XCL1 /// XCL2	chemokine (C motif) ligand 1 /// chemokine (C motif) ligand 2	NM_002995 /// NM_003175	yes
214574_x_at	LST1	leukocyte specific transcript 1	NM_001166538 /// NM_007161 /// NM_205837 /// NM_205838 /// NM_205839 /// NM_2058	yes
214768_x_at	IGKV1-5	immunoglobulin kappa variable 1-5	---	yes
214777_at	IGKV4-1	immunoglobulin kappa variable 4-1	---	yes
215346_at	CD40	CD40 molecule, TNF receptor superfamily member 5	NM_001250 /// NM_152854	yes
215388_s_at	CFH /// CFHR1	complement factor H /// complement factor H-related 1	NM_000186 /// NM_001014975 /// NM_002113	yes
215806_x_at	TARP /// TRGC2	TCR gamma alternate reading frame protein /// T cell receptor gamma constant 2	NM_001003799 /// NM_001003806	yes
216250_s_at	LPXN	leupaxin	NM_001143995 /// NM_004811	yes
216920_s_at	TARP /// TRGC2	TCR gamma alternate reading frame protein /// T cell receptor gamma constant 2	NM_001003799 /// NM_001003806	yes
217147_s_at	TRAT1	T cell receptor associated transmembrane adaptor 1	NM_016388	yes
217235_x_at	IGLL5 /// IGLV2-11	immunoglobulin lambda-like polypeptide 5 /// immunoglobulin lambda variable 2-11	NM_001178126 /// NR_033661	yes
218805_at	GIMAP5	GTPase, IMAP family member 5	NM_018384	yes
218870_at	ARHGAP15	Rho GTPase activating protein 15	NM_018460	yes
219014_at	PLAC8	placenta-specific 8	NM_001130715 /// NM_001130716 /// NM_016619	yes
219243_at	GIMAP4	GTPase, IMAP family member 4	NM_018326	yes
219777_at	GIMAP6	GTPase, IMAP family member 6	NM_024711 /// NR_024115	yes
219812_at	PVRIG	poliovirus receptor related immunoglobulin domain containing	NM_024070	yes
220132_s_at	CLEC2D	C-type lectin domain family 2, member D	NM_001004419 /// NM_001197317 /// NM_001197318 /// NM_001197319 /// NM_013269 //	yes
220485_s_at	SIRPG	signal-regulatory protein gamma	NM_001039508 /// NM_018556 /// NM_080816	yes
220577_at	GVINP1	GTPase, very large interferon inducible pseudogene 1	NR_003945	yes
220684_at	TBX21	T-box 21	NM_013351	yes
221004_s_at	ITM2C	integral membrane protein 2C	NM_001012514 /// NM_001012516 /// NM_030926	yes
221286_s_at	MGC29506	plasma cell-induced ER protein 1	NM_016459	yes
221969_at	PAX5	paired box 5	NM_016734	yes
223640_at	HCST	hematopoietic cell signal transducer	NM_001007469 /// NM_014266	no
224356_x_at	MS4A6A	membrane-spanning 4-domains, subfamily A, member 6A	NM_022349 /// NM_152851 /// NM_152852	no
224404_s_at	FCRL5	Fc receptor-like 5	NM_001195388 /// NM_031281	no
224451_x_at	ARHGAP9	Rho GTPase activating protein 9	NM_001080156 /// NM_001080157 /// NM_032496	no
225622_at	PAG1	phosphoprotein associated with glycosphingolipid microdomains 1	NM_018440	no
226218_at	IL7R	interleukin 7 receptor	NM_002185	no
226219_at	ARHGAP30	Rho GTPase activating protein 30	NM_001025598 /// NM_181720	no
226818_at	MPEG1	macrophage expressed 1	NM_001039396	no
226841_at	MPEG1	macrophage expressed 1	NM_001039396	no
226875_at	DOCK11	dedicator of cytokinesis 11	NM_144658	no
227266_s_at	FYB	FYN binding protein	NM_001465 /// NM_199335	no
227344_at	IKZF1	IKAROS family zinc finger 1 (Ikaros)	NM_006060	no
227346_at	IKZF1	IKAROS family zinc finger 1 (Ikaros)	NM_006060	no
227354_at	PAG1	phosphoprotein associated with glycosphingolipid microdomains 1	NM_018440	no
228071_at	GIMAP7	GTPase, IMAP family member 7	NM_153236	no
228167_at	KLHL6	kelch-like 6 (Drosophila)	NM_130446	no
228258_at	TBC1D10C	TBC1 domain family, member 10C	NM_198517	no
228592_at	MS4A1	membrane-spanning 4-domains, subfamily A, member 1	NM_021950 /// NM_152866	no
229629_at	---	---	---	no
229686_at	P2RY8	purinergic receptor P2Y, G-protein coupled, 8	NM_178129	no
231093_at	FCRL3	Fc receptor-like 3	NM_052939	no
231124_x_at	LY9	lymphocyte antigen 9	NM_001033667 /// NM_002348	no
232543_x_at	ARHGAP9	Rho GTPase activating protein 9	NM_001080156 /// NM_001080157 /// NM_032496	no
233510_s_at	PARVG	parvin, gamma	NM_001137605 /// NM_001137606 /// NM_022141 /// NR_024426 /// NR_024427 /// NR_0	no
236280_at	---	---	---	no
236295_s_at	NLRC3	NLR family, CARD domain containing 3	NM_178844	no
239237_at	---	---	---	no
239294_at	---	---	---	no
240070_at	TIGIT	T cell immunoreceptor with Ig and ITIM domains	NM_173799	no
34210_at	CD52	CD52 molecule	NM_001803	yes
36030_at	IFFO1	intermediate filament family orphan 1	NM_001039670 /// NM_001193457 /// NM_080730 /// NR_036467	yes
38149_at	ARHGAP25	Rho GTPase activating protein 25	NM_001007231 /// NM_001166276 /// NM_001166277 /// NM_014882	yes
40420_at	STK10	serine/threonine kinase 10	NM_005990	yes
64064_at	GIMAP5	GTPase, IMAP family member 5	NM_018384	yes

## Sheet: TILsignatureGenes-120probes
Probeset ID	Gene Symbol	Gene Title	RefSeq Transcript ID	also in TME genes
205213_at	ACAP1	ArfGAP with coiled-coil, ankyrin repeat and PH domains 1	NM_014716	no
218870_at	ARHGAP15	Rho GTPase activating protein 15	NM_018460	no
38149_at	ARHGAP25	Rho GTPase activating protein 25	NM_001007231 /// NM_001166276 /// NM_001166277 /// NM_014882	no
210785_s_at	C1orf38	chromosome 1 open reading frame 38	NM_001039477 /// NM_001105556 /// NM_004848	no
206978_at	CCR2	chemokine (C-C motif) receptor 2	NM_001123041 /// NM_001123396	no
206337_at	CCR7	chemokine (C-C motif) receptor 7	NM_001838	no
205831_at	CD2	CD2 molecule	NM_001767	no
210031_at	CD247	CD247 molecule	NM_000734 /// NM_198053	no
206150_at	CD27	CD27 molecule	NM_001242	yes
206545_at	CD28	CD28 molecule	NM_006139	yes
205692_s_at	CD38	CD38 molecule	NM_001775	no
213539_at	CD3D	CD3d molecule, delta (CD3-TCR complex)	NM_000732 /// NM_001040651	no
205456_at	CD3E	CD3e molecule, epsilon (CD3-TCR complex)	NM_000733	no
206804_at	CD3G	CD3g molecule, gamma (CD3-TCR complex)	NM_000073	no
215346_at	CD40	CD40 molecule, TNF receptor superfamily member 5	NM_001250 /// NM_152854	yes
204118_at	CD48	CD48 molecule	NM_001778	no
204661_at	CD52	CD52 molecule	NM_001803	no
34210_at	CD52	CD52 molecule	NM_001803	no
203416_at	CD53	CD53 molecule	NM_000560 /// NM_001040033	no
213958_at	CD6	CD6 molecule	NM_006725	no
205685_at	CD86	CD86 molecule	NM_006889 /// NM_175862	yes
205758_at	CD8A	CD8a molecule	NM_001145873 /// NM_001768 /// NM_171827 /// NR_027353	no
215388_s_at	CFH /// CFHR1	complement factor H /// complement factor H-related 1	NM_000186 /// NM_001014975 /// NM_002113	no
220132_s_at	CLEC2D	C-type lectin domain family 2, member D	NM_001004419 /// NM_001197317 /// NM_001197318 /// NM_001197319 /// NM_013269 //	no
209083_at	CORO1A	coronin, actin binding protein, 1A	NM_001193333 /// NM_007074	no
205159_at	CSF2RB	colony stimulating factor 2 receptor, beta, low-affinity (granulocyte-macrophage	NM_000395	yes
210140_at	CST7	cystatin F (leukocystatin)	NM_003650	no
203923_s_at	CYBB	cytochrome b-245, beta polypeptide	NM_000397	no
213160_at	DOCK2	dedicator of cytokinesis 2	NM_004946	no
214054_at	DOK2	docking protein 2, 56kDa	NM_003974	no
211742_s_at	EVI2B	ecotropic viral integration site 2B	NM_006495	no
204714_s_at	F5	coagulation factor V (proaccelerin, labile factor)	NM_000130	no
206707_x_at	FAM65B	family with sequence similarity 65, member B	NM_014722 /// NM_015864	no
219243_at	GIMAP4	GTPase, IMAP family member 4	NM_018326	no
218805_at	GIMAP5	GTPase, IMAP family member 5	NM_018384	no
64064_at	GIMAP5	GTPase, IMAP family member 5	NM_018384	no
219777_at	GIMAP6	GTPase, IMAP family member 6	NM_024711 /// NR_024115	no
212414_s_at	GLYR1 /// SEPT6	glyoxylate reductase 1 homolog (Arabidopsis) /// septin 6	NM_015129 /// NM_032569 /// NM_145799 /// NM_145800 /// NM_145802	no
207651_at	GPR171	G protein-coupled receptor 171	NM_013308	no
210279_at	GPR18	G protein-coupled receptor 18	NM_001098200 /// NM_005292	no
204265_s_at	GPSM3	G-protein signaling modulator 3	NM_022107	no
220577_at	GVINP1	GTPase, very large interferon inducible pseudogene 1	NR_003945	no
206666_at	GZMK	granzyme K (granzyme 3; tryptase II)	NM_002104	yes
202957_at	HCLS1	hematopoietic cell-specific Lyn substrate 1	NM_005335	no
210439_at	ICOS	inducible T-cell co-stimulator	NM_012092	yes
36030_at	IFFO1	intermediate filament family orphan 1	NM_001039670 /// NM_001193457 /// NM_080730 /// NR_036467	no
211635_x_at	IGHA1 /// IGHA2 /// IGHD /// IGHG1 /// IGHG3 /// IGHG4 /// IGHM /// IGHV4-31 /// LOC100133862	immunoglobulin heavy constant alpha 1 /// immunoglobulin heavy constant alpha 2	---	no
211640_x_at	IGHG1 /// IGHM /// LOC100133862	immunoglobulin heavy constant gamma 1 (G1m marker) /// immunoglobulin heavy cons	---	no
209374_s_at	IGHM	immunoglobulin heavy constant mu	---	no
212827_at	IGHM	immunoglobulin heavy constant mu	---	no
211634_x_at	IGHM /// LOC100133862	immunoglobulin heavy constant mu /// ig heavy chain V-I region V35-like	---	no
214768_x_at	IGKV1-5	immunoglobulin kappa variable 1-5	---	no
214777_at	IGKV4-1	immunoglobulin kappa variable 4-1	---	no
217235_x_at	IGLL5 /// IGLV2-11	immunoglobulin lambda-like polypeptide 5 /// immunoglobulin lambda variable 2-11	NM_001178126 /// NR_033661	no
204912_at	IL10RA	interleukin 10 receptor, alpha	NM_001558 /// NR_026691	no
209827_s_at	IL16	interleukin 16 (lymphocyte chemoattractant factor)	NM_001172128 /// NM_004513 /// NM_172217	no
205291_at	IL2RB	interleukin 2 receptor, beta	NM_000878	no
204116_at	IL2RG	interleukin 2 receptor, gamma	NM_000206	no
205798_at	IL7R	interleukin 7 receptor	NM_002185	no
203332_s_at	INPP5D	inositol polyphosphate-5-phosphatase, 145kDa	NM_001017915 /// NM_005541	no
204562_at	IRF4	interferon regulatory factor 4	NM_001195286 /// NM_002460 /// NR_036585	no
213416_at	ITGA4	integrin, alpha 4 (antigen CD49D, alpha 4 subunit of VLA-4 receptor)	NM_000885	no
211339_s_at	ITK	IL2-inducible T-cell kinase	NM_005546	no
221004_s_at	ITM2C	integral membrane protein 2C	NM_001012514 /// NM_001012516 /// NM_030926	no
207795_s_at	KLRD1	killer cell lectin-like receptor subfamily D, member 1	NM_001114396 /// NM_002262 /// NM_007334	no
205821_at	KLRK1	killer cell lectin-like receptor subfamily K, member 1	NM_007360	no
211005_at	LAT /// SPNS1	linker for activation of T cells /// spinster homolog 1 (Drosophila)	NM_001014987 /// NM_001014988 /// NM_001014989 /// NM_001142448 /// NM_001142449	no
207734_at	LAX1	lymphocyte transmembrane adaptor 1	NM_001136190 /// NM_017773	no
204890_s_at	LCK	lymphocyte-specific protein tyrosine kinase	NM_001042771 /// NM_005356	no
204891_s_at	LCK	lymphocyte-specific protein tyrosine kinase	NM_001042771 /// NM_005356	no
205270_s_at	LCP2	lymphocyte cytosolic protein 2 (SH2 domain containing leukocyte protein of 76kDa	NM_005565	no
211336_x_at	LILRB1	leukocyte immunoglobulin-like receptor, subfamily B (with TM and ITIM domains),	NM_001081637 /// NM_001081638 /// NM_001081639 /// NM_006669	no
216250_s_at	LPXN	leupaxin	NM_001143995 /// NM_004811	no
211582_x_at	LST1	leukocyte specific transcript 1	NM_001166538 /// NM_007161 /// NM_205837 /// NM_205838 /// NM_205839 /// NM_2058	no
214574_x_at	LST1	leukocyte specific transcript 1	NM_001166538 /// NM_007161 /// NM_205837 /// NM_205838 /// NM_205839 /// NM_2058	no
210370_s_at	LY9	lymphocyte antigen 9	NM_001033667 /// NM_002348	no
204777_s_at	MAL	mal, T-cell differentiation protein	NM_002371 /// NM_022438 /// NM_022439 /// NM_022440	no
204153_s_at	MFNG	MFNG O-fucosylpeptide 3-beta-N-acetylglucosaminyltransferase	NM_001166343 /// NM_002405 /// NR_029413	no
221286_s_at	MGC29506	plasma cell-induced ER protein 1	NM_016459	no
210356_x_at	MS4A1	membrane-spanning 4-domains, subfamily A, member 1	NM_021950 /// NM_152866	no
205147_x_at	NCF4	neutrophil cytosolic factor 4, 40kDa	NM_000631 /// NM_013416	no
209734_at	NCKAP1L	NCK-associated protein 1-like	NM_001184976 /// NM_005337	no
221969_at	PAX5	paired box 5	NM_016734	no
203879_at	PIK3CD	phosphoinositide-3-kinase, catalytic, delta polypeptide	NM_005026	yes
219014_at	PLAC8	placenta-specific 8	NM_001130715 /// NM_001130716 /// NM_016619	no
203470_s_at	PLEK	pleckstrin	NM_002664	no
203471_s_at	PLEK	pleckstrin	NM_002664	no
209685_s_at	PRKCB	protein kinase C, beta	NM_002738 /// NM_212535	no
210038_at	PRKCQ	protein kinase C, theta	NM_006257	no
207238_s_at	PTPRC	protein tyrosine phosphatase, receptor type, C	NM_002838 /// NM_080921 /// NM_080923	no
204960_at	PTPRCAP	protein tyrosine phosphatase, receptor type, C-associated protein	NM_005608	no
219812_at	PVRIG	poliovirus receptor related immunoglobulin domain containing	NM_024070	yes
204923_at	SASH3	SAM and SH3 domain containing 3	NM_018990	no
204563_at	SELL	selectin L	NM_000655 /// NR_029467	no
209879_at	SELPLG	selectin P ligand	NM_003006	no
210116_at	SH2D1A	SH2 domain containing 1A	NM_001114937 /// NM_002351	no
220485_s_at	SIRPG	signal-regulatory protein gamma	NM_001039508 /// NM_018556 /// NM_080816	no
205484_at	SIT1	signaling threshold regulating transmembrane adaptor 1	NM_014450	no
206181_at	SLAMF1	signaling lymphocytic activation molecule family member 1	NM_003037	no
206118_at	STAT4	signal transducer and activator of transcription 4	NM_003151	no
203047_at	STK10	serine/threonine kinase 10	NM_005990	no
40420_at	STK10	serine/threonine kinase 10	NM_005990	no
209813_x_at	TARP	TCR gamma alternate reading frame protein	NM_001003799 /// NM_001003806	no
211144_x_at	TARP /// TRGC2	TCR gamma alternate reading frame protein /// T cell receptor gamma constant 2	NM_001003799 /// NM_001003806	no
215806_x_at	TARP /// TRGC2	TCR gamma alternate reading frame protein /// T cell receptor gamma constant 2	NM_001003799 /// NM_001003806	no
216920_s_at	TARP /// TRGC2	TCR gamma alternate reading frame protein /// T cell receptor gamma constant 2	NM_001003799 /// NM_001003806	no
220684_at	TBX21	T-box 21	NM_013351	no
209995_s_at	TCL1A	T-cell leukemia/lymphoma 1A	NM_001098725 /// NM_021966	no
214228_x_at	TNFRSF4	tumor necrosis factor receptor superfamily, member 4	NM_003327	yes
209670_at	TRAC	T cell receptor alpha constant	---	no
209671_x_at	TRAC	T cell receptor alpha constant	---	no
210972_x_at	TRAC /// TRAJ17 /// TRAV20	T cell receptor alpha constant /// T cell receptor alpha joining 17 /// T cell r	---	no
205804_s_at	TRAF3IP3	TRAF3 interacting protein 3	NM_025228	no
217147_s_at	TRAT1	T cell receptor associated transmembrane adaptor 1	NM_016388	no
210915_x_at	TRBC1	T cell receptor beta constant 1	---	no
213193_x_at	TRBC1	T cell receptor beta constant 1	---	no
211796_s_at	TRBC1 /// TRBC2	T cell receptor beta constant 1 /// T cell receptor beta constant 2	---	no
204929_s_at	VAMP5	vesicle-associated membrane protein 5 (myobrevin)	NM_006634	no
206366_x_at	XCL1	chemokine (C motif) ligand 1	NM_002995	no
214567_s_at	XCL1 /// XCL2	chemokine (C motif) ligand 1 /// chemokine (C motif) ligand 2	NM_002995 /// NM_003175	no
