# Supplementary material for: Clonality, Antigen Recognition, and Suppression of CD8+ T Cells Differentially Affect Prognosis of Breast Cancer Subtypes
Source: Oxford University Press journal article supplement (doi:10.1158/1078-0432.ccr-19-0285), 2019-10-24
Supplement: 10780432ccr190285-sup-215982_3_supp_5813159_pysghc.xlsx [file 10780432ccr190285-sup-215982_3_supp_5813159_pysghc.xlsx]

## Sheet: Sheet1
Genes and classification			All BC				Basal-like				Her2				lumA				lumB				normal-like
main immune parameter	sub-category	gene	beta	HR (95% CI for HR)	wald.test	p.value	beta	HR (95% CI for HR)	wald.test	p.value	beta	HR (95% CI for HR)	wald.test	p.value	beta	HR (95% CI for HR)	wald.test	p.value	beta	HR (95% CI for HR)	wald.test	p.value	beta	HR (95% CI for HR)	wald.test	p.value
Antigen processing and presentation	Antigen presentation	CALR	-0.11	0.9 (0.75-1.1)	1.3	0.25	-0.31	0.73 (0.52-1)	3.1	0.08	-0.16	0.85 (0.53-1.4)	0.45	0.5	-0.13	0.88 (0.55-1.4)	0.28	0.6	-0.38	0.69 (0.44-1.1)	2.7	0.099	-0.38	0.69 (0.44-1.1)	2.7	0.099
Antigen processing and presentation	Antigen presentation	CANX	-0.052	0.95 (0.8-1.1)	0.35	0.55	0.09	1.1 (0.81-1.5)	0.34	0.56	-0.041	0.96 (0.62-1.5)	0.03	0.85	-0.36	0.7 (0.46-1.1)	2.8	0.095	-0.2	0.82 (0.59-1.2)	1.3	0.25	-0.2	0.82 (0.59-1.2)	1.3	0.25
Antigen processing and presentation	MHC I	B2M	-0.36	0.7 (0.51-0.95)	5.1	0.024	-0.38	0.69 (0.42-1.1)	2.2	0.14	-1.1	0.35 (0.15-0.78)	6.6	0.01	0.36	1.4 (0.59-3.5)	0.64	0.42	-0.46	0.63 (0.36-1.1)	2.6	0.11	-0.46	0.63 (0.36-1.1)	2.6	0.11
Antigen processing and presentation	MHC I	B2M	-0.36	0.7 (0.51-0.95)	5.1	0.024	-0.38	0.69 (0.42-1.1)	2.2	0.14	-1.1	0.35 (0.15-0.78)	6.6	0.01	0.36	1.4 (0.59-3.5)	0.64	0.42	-0.46	0.63 (0.36-1.1)	2.6	0.11	-0.46	0.63 (0.36-1.1)	2.6	0.11
Antigen processing and presentation	MHC I	BTK	-0.54	0.58 (0.4-0.85)	8	0.0047	-1.2	0.31 (0.15-0.67)	9	0.0027	-0.55	0.58 (0.24-1.4)	1.5	0.21	-0.46	0.63 (0.23-1.7)	0.79	0.37	-0.32	0.73 (0.34-1.6)	0.67	0.41	-0.32	0.73 (0.34-1.6)	0.67	0.41
Antigen processing and presentation	MHC I	CALR	-0.11	0.9 (0.75-1.1)	1.3	0.25	-0.31	0.73 (0.52-1)	3.1	0.08	-0.16	0.85 (0.53-1.4)	0.45	0.5	-0.13	0.88 (0.55-1.4)	0.28	0.6	-0.38	0.69 (0.44-1.1)	2.7	0.099	-0.38	0.69 (0.44-1.1)	2.7	0.099
Antigen processing and presentation	MHC I	CD14	-0.11	0.89 (0.76-1.1)	1.7	0.19	-0.062	0.94 (0.68-1.3)	0.15	0.7	-0.3	0.74 (0.47-1.2)	1.7	0.2	0.014	1 (0.67-1.5)	0	0.95	-0.26	0.77 (0.55-1.1)	2.1	0.15	-0.26	0.77 (0.55-1.1)	2.1	0.15
Antigen processing and presentation	MHC I	CD207	-0.29	0.75 (0.53-1.1)	2.6	0.11	-0.11	0.9 (0.53-1.5)	0.16	0.69	-1.3	0.28 (0.061-1.3)	2.7	0.1	-0.11	0.89 (0.45-1.8)	0.11	0.74	0.021	1 (0.4-2.6)	0	0.96	0.021	1 (0.4-2.6)	0	0.96
Antigen processing and presentation	MHC I	CD36	-0.0078	0.99 (0.9-1.1)	0.03	0.87	0.21	1.2 (1-1.5)	5.1	0.024	-0.059	0.94 (0.73-1.2)	0.2	0.66	0.029	1 (0.84-1.3)	0.08	0.78	0.096	1.1 (0.9-1.4)	0.82	0.36	0.096	1.1 (0.9-1.4)	0.82	0.36
Antigen processing and presentation	MHC I	CHUK	0.53	1.7 (1.3-2.3)	12	0.00069	0.6	1.8 (0.96-3.4)	3.4	0.064	0.67	2 (1-3.8)	3.9	0.049	0.52	1.7 (0.81-3.5)	1.9	0.17	0.17	1.2 (0.62-2.3)	0.26	0.61	0.17	1.2 (0.62-2.3)	0.26	0.61
Antigen processing and presentation	MHC I	CYBA	-0.14	0.87 (0.74-1)	3	0.082	-0.43	0.65 (0.48-0.89)	7.3	0.007	-0.46	0.63 (0.44-0.89)	6.8	0.0089	0.21	1.2 (0.79-1.9)	0.84	0.36	-0.2	0.82 (0.59-1.1)	1.4	0.24	-0.2	0.82 (0.59-1.1)	1.4	0.24
Antigen processing and presentation	MHC I	CYBB	-0.27	0.76 (0.62-0.93)	7.1	0.0077	-0.41	0.67 (0.47-0.94)	5.3	0.021	-0.25	0.78 (0.46-1.3)	0.85	0.36	-0.33	0.72 (0.42-1.2)	1.5	0.23	-0.36	0.69 (0.45-1.1)	2.8	0.095	-0.36	0.69 (0.45-1.1)	2.8	0.095
Antigen processing and presentation	MHC I	ERAP2	-0.12	0.89 (0.79-0.99)	4.4	0.035	-0.087	0.92 (0.74-1.1)	0.63	0.43	-0.043	0.96 (0.75-1.2)	0.12	0.73	-0.14	0.87 (0.67-1.1)	1	0.31	-0.12	0.89 (0.69-1.1)	0.83	0.36	-0.12	0.89 (0.69-1.1)	0.83	0.36
Antigen processing and presentation	MHC I	ERAP2	-0.12	0.89 (0.79-0.99)	4.4	0.035	-0.087	0.92 (0.74-1.1)	0.63	0.43	-0.043	0.96 (0.75-1.2)	0.12	0.73	-0.14	0.87 (0.67-1.1)	1	0.31	-0.12	0.89 (0.69-1.1)	0.83	0.36	-0.12	0.89 (0.69-1.1)	0.83	0.36
Antigen processing and presentation	MHC I	FCGR1A	-0.29	0.75 (0.3-1.9)	0.37	0.55	-1.8	0.17 (0.024-1.2)	3.3	0.07	-0.45	0.64 (0.08-5.1)	0.18	0.67	-2	0.13 (0.013-1.4)	2.9	0.089	0.39	1.5 (0.19-11)	0.14	0.71	0.39	1.5 (0.19-11)	0.14	0.71
Antigen processing and presentation	MHC I	FCGR1B	-0.11	0.9 (0.75-1.1)	1.2	0.26	-0.26	0.77 (0.56-1.1)	2.5	0.12	-0.14	0.87 (0.53-1.4)	0.31	0.58	-0.14	0.87 (0.53-1.4)	0.33	0.57	-0.28	0.75 (0.49-1.1)	1.7	0.19	-0.28	0.75 (0.49-1.1)	1.7	0.19
Antigen processing and presentation	MHC I	HSPA5	-0.19	0.83 (0.61-1.1)	1.4	0.23	-0.51	0.6 (0.34-1.1)	3	0.083	0.22	1.2 (0.57-2.7)	0.31	0.57	-0.32	0.73 (0.37-1.4)	0.84	0.36	-0.49	0.61 (0.31-1.2)	2	0.16	-0.49	0.61 (0.31-1.2)	2	0.16
Antigen processing and presentation	MHC I	IKBKB	-0.016	0.98 (0.84-1.1)	0.04	0.84	0.063	1.1 (0.7-1.6)	0.09	0.77	0.14	1.1 (0.77-1.7)	0.46	0.5	0.37	1.4 (0.93-2.2)	2.7	0.1	0.33	1.4 (0.98-2)	3.4	0.063	0.33	1.4 (0.98-2)	3.4	0.063
Antigen processing and presentation	MHC I	IKBKG	0.18	1.2 (0.73-2)	0.5	0.48	-0.97	0.38 (0.15-0.97)	4.1	0.043	1.4	4.2 (0.96-19)	3.6	0.056	0.68	2 (0.56-7)	1.1	0.29	-0.31	0.74 (0.26-2.1)	0.34	0.56	-0.31	0.74 (0.26-2.1)	0.34	0.56
Antigen processing and presentation	MHC I	ITGAV	0.061	1.1 (0.88-1.3)	0.39	0.53	0.39	1.5 (1-2.1)	5	0.026	0.48	1.6 (0.9-2.9)	2.6	0.11	0.13	1.1 (0.71-1.8)	0.28	0.59	-0.05	0.95 (0.64-1.4)	0.06	0.81	-0.05	0.95 (0.64-1.4)	0.06	0.81
Antigen processing and presentation	MHC I	ITGB5	-0.021	0.98 (0.79-1.2)	0.04	0.85	0.41	1.5 (0.96-2.4)	3.1	0.076	-0.15	0.86 (0.48-1.6)	0.23	0.63	-0.12	0.89 (0.53-1.5)	0.21	0.64	-0.033	0.97 (0.62-1.5)	0.02	0.89	-0.033	0.97 (0.62-1.5)	0.02	0.89
Antigen processing and presentation	MHC I	LY96	-0.093	0.91 (0.8-1)	1.8	0.18	-0.014	0.99 (0.76-1.3)	0.01	0.91	-0.12	0.89 (0.6-1.3)	0.36	0.55	0.14	1.2 (0.84-1.6)	0.77	0.38	-0.26	0.77 (0.58-1)	3	0.086	-0.26	0.77 (0.58-1)	3	0.086
Antigen processing and presentation	MHC I	MRC1	-0.12	0.89 (0.78-1)	3.5	0.06	-0.091	0.91 (0.72-1.2)	0.57	0.45	-0.35	0.7 (0.49-1)	3.8	0.051	0.08	1.1 (0.79-1.5)	0.25	0.62	-0.15	0.86 (0.65-1.1)	1.2	0.27	-0.15	0.86 (0.65-1.1)	1.2	0.27
Antigen processing and presentation	MHC I	MRC2	0.25	1.3 (0.99-1.7)	3.6	0.058	0.33	1.4 (0.87-2.2)	1.9	0.17	0.75	2.1 (1-4.5)	3.9	0.048	0.56	1.7 (0.96-3.2)	3.3	0.069	0.84	2.3 (1.2-4.4)	6.7	0.0098	0.84	2.3 (1.2-4.4)	6.7	0.0098
Antigen processing and presentation	MHC I	MYD88	-0.072	0.93 (0.66-1.3)	0.16	0.69	-0.084	0.92 (0.5-1.7)	0.07	0.79	-0.46	0.63 (0.26-1.5)	1.1	0.3	0.18	1.2 (0.47-3.1)	0.14	0.71	-0.48	0.62 (0.28-1.4)	1.4	0.24	-0.48	0.62 (0.28-1.4)	1.4	0.24
Antigen processing and presentation	MHC I	NCF2	-0.016	0.98 (0.81-1.2)	0.02	0.88	-0.32	0.73 (0.5-1.1)	2.8	0.097	-0.088	0.92 (0.55-1.5)	0.12	0.73	0.23	1.3 (0.72-2.2)	0.66	0.41	-0.19	0.83 (0.51-1.4)	0.55	0.46	-0.19	0.83 (0.51-1.4)	0.55	0.46
Antigen processing and presentation	MHC I	NCF4	-0.32	0.73 (0.57-0.92)	7.1	0.0075	-0.36	0.7 (0.47-1)	3.1	0.08	-0.63	0.53 (0.29-0.99)	3.9	0.047	-0.41	0.66 (0.34-1.3)	1.4	0.23	-0.5	0.61 (0.34-1.1)	2.7	0.098	-0.5	0.61 (0.34-1.1)	2.7	0.098
Antigen processing and presentation	MHC I	SEC22B	-0.094	0.91 (0.7-1.2)	0.51	0.48	-0.35	0.7 (0.43-1.2)	1.9	0.17	0.32	1.4 (0.71-2.7)	0.9	0.34	-0.2	0.82 (0.44-1.5)	0.43	0.51	-0.22	0.8 (0.48-1.3)	0.73	0.39	-0.22	0.8 (0.48-1.3)	0.73	0.39
Antigen processing and presentation	MHC I	SEC61A1	0.076	1.1 (0.77-1.5)	0.2	0.65	0.1	1.1 (0.6-2)	0.1	0.75	0.2	1.2 (0.52-2.8)	0.21	0.64	-0.32	0.72 (0.31-1.7)	0.56	0.45	-0.27	0.76 (0.39-1.5)	0.63	0.43	-0.27	0.76 (0.39-1.5)	0.63	0.43
Antigen processing and presentation	MHC I	SEC61A2	0.35	1.4 (1.1-1.9)	5.5	0.019	-0.019	0.98 (0.52-1.9)	0	0.95	-0.51	0.6 (0.29-1.2)	1.9	0.17	0.61	1.8 (0.73-4.6)	1.7	0.2	0.51	1.7 (0.87-3.2)	2.4	0.13	0.51	1.7 (0.87-3.2)	2.4	0.13
Antigen processing and presentation	MHC I	SEC61B	-0.098	0.91 (0.6-1.4)	0.21	0.64	-0.13	0.88 (0.42-1.9)	0.11	0.74	-0.39	0.68 (0.22-2.1)	0.47	0.49	-0.26	0.77 (0.29-2.1)	0.27	0.6	-0.58	0.56 (0.22-1.4)	1.5	0.22	-0.58	0.56 (0.22-1.4)	1.5	0.22
Antigen processing and presentation	MHC I	SEC61G	0.29	1.3 (1.1-1.7)	6	0.015	-0.17	0.84 (0.53-1.4)	0.51	0.48	0.34	1.4 (0.89-2.2)	2.1	0.15	0.38	1.5 (0.74-2.9)	1.2	0.28	0.12	1.1 (0.58-2.2)	0.13	0.72	0.12	1.1 (0.58-2.2)	0.13	0.72
Antigen processing and presentation	MHC I	SNAP23	-0.19	0.82 (0.65-1)	2.7	0.1	-0.13	0.87 (0.53-1.4)	0.28	0.6	0.46	1.6 (0.85-2.9)	2.1	0.14	0.076	1.1 (0.57-2)	0.06	0.81	-0.28	0.75 (0.46-1.2)	1.2	0.27	-0.28	0.75 (0.46-1.2)	1.2	0.27
Antigen processing and presentation	MHC I	STX4	-0.44	0.64 (0.49-0.85)	9.8	0.0017	-0.77	0.46 (0.27-0.8)	7.8	0.0053	-0.087	0.92 (0.41-2.1)	0.04	0.83	-0.3	0.74 (0.41-1.3)	0.99	0.32	-0.28	0.76 (0.42-1.4)	0.84	0.36	-0.28	0.76 (0.42-1.4)	0.84	0.36
Antigen processing and presentation	MHC I	TAP1	-0.058	0.94 (0.83-1.1)	0.72	0.4	-0.3	0.74 (0.58-0.95)	5.8	0.016	-0.24	0.79 (0.57-1.1)	2.1	0.15	0.11	1.1 (0.74-1.7)	0.3	0.59	-0.25	0.78 (0.59-1)	3	0.083	-0.25	0.78 (0.59-1)	3	0.083
Antigen processing and presentation	MHC I	TAP1	-0.058	0.94 (0.83-1.1)	0.72	0.4	-0.3	0.74 (0.58-0.95)	5.8	0.016	-0.24	0.79 (0.57-1.1)	2.1	0.15	0.11	1.1 (0.74-1.7)	0.3	0.59	-0.25	0.78 (0.59-1)	3	0.083	-0.25	0.78 (0.59-1)	3	0.083
Antigen processing and presentation	MHC I	TAP2	-0.23	0.79 (0.62-1)	3.3	0.069	-0.52	0.59 (0.39-0.9)	6.1	0.014	-0.78	0.46 (0.23-0.93)	4.7	0.03	0.4	1.5 (0.71-3.1)	1.1	0.29	-0.22	0.8 (0.41-1.6)	0.43	0.51	-0.22	0.8 (0.41-1.6)	0.43	0.51
Antigen processing and presentation	MHC I	TAP2	-0.23	0.79 (0.62-1)	3.3	0.069	-0.52	0.59 (0.39-0.9)	6.1	0.014	-0.78	0.46 (0.23-0.93)	4.7	0.03	0.4	1.5 (0.71-3.1)	1.1	0.29	-0.22	0.8 (0.41-1.6)	0.43	0.51	-0.22	0.8 (0.41-1.6)	0.43	0.51
Antigen processing and presentation	MHC I	TAPBP	-0.32	0.73 (0.58-0.91)	7.6	0.0059	-0.47	0.62 (0.43-0.9)	6.3	0.012	-0.51	0.6 (0.34-1.1)	3.2	0.076	-0.094	0.91 (0.52-1.6)	0.11	0.74	-0.35	0.7 (0.41-1.2)	1.5	0.21	-0.35	0.7 (0.41-1.2)	1.5	0.21
Antigen processing and presentation	MHC I	TAPBP	-0.32	0.73 (0.58-0.91)	7.6	0.0059	-0.47	0.62 (0.43-0.9)	6.3	0.012	-0.51	0.6 (0.34-1.1)	3.2	0.076	-0.094	0.91 (0.52-1.6)	0.11	0.74	-0.35	0.7 (0.41-1.2)	1.5	0.21	-0.35	0.7 (0.41-1.2)	1.5	0.21
Antigen processing and presentation	MHC I	TLR1	-0.35	0.71 (0.53-0.94)	5.5	0.019	-0.41	0.66 (0.43-1)	3.4	0.066	-0.63	0.53 (0.22-1.3)	2	0.16	-0.22	0.81 (0.38-1.7)	0.31	0.58	-0.56	0.57 (0.28-1.2)	2.3	0.13	-0.56	0.57 (0.28-1.2)	2.3	0.13
Antigen processing and presentation	MHC I	TLR2	-0.084	0.92 (0.7-1.2)	0.36	0.55	-0.1	0.9 (0.57-1.4)	0.19	0.66	-0.16	0.85 (0.39-1.9)	0.16	0.69	0.41	1.5 (0.73-3.1)	1.3	0.26	-0.34	0.71 (0.36-1.4)	0.97	0.33	-0.34	0.71 (0.36-1.4)	0.97	0.33
Antigen processing and presentation	MHC I	TLR4	-0.62	0.54 (0.36-0.82)	8.5	0.0035	-1	0.36 (0.17-0.77)	6.9	0.0087	-1.1	0.35 (0.11-1.1)	3.5	0.062	-0.025	0.97 (0.33-2.8)	0	0.96	-0.53	0.59 (0.26-1.3)	1.6	0.21	-0.53	0.59 (0.26-1.3)	1.6	0.21
Antigen processing and presentation	MHC I	TLR6	0.099	1.1 (0.62-2)	0.11	0.74	-0.27	0.77 (0.24-2.5)	0.2	0.66	-0.75	0.47 (0.12-1.9)	1.1	0.29	0.79	2.2 (0.5-9.7)	1.1	0.3	-0.22	0.8 (0.21-3.1)	0.1	0.75	-0.22	0.8 (0.21-3.1)	0.1	0.75
Antigen processing and presentation	MHC I	VAMP8	-0.22	0.8 (0.63-1)	3.4	0.065	-0.33	0.72 (0.48-1.1)	2.6	0.1	-0.23	0.79 (0.41-1.5)	0.48	0.49	-0.28	0.75 (0.43-1.3)	0.99	0.32	-0.57	0.56 (0.36-0.89)	6.1	0.013	-0.57	0.56 (0.36-0.89)	6.1	0.013
Antigen processing and presentation	MHC I and II	CANX	-0.052	0.95 (0.8-1.1)	0.35	0.55	0.09	1.1 (0.81-1.5)	0.34	0.56	-0.041	0.96 (0.62-1.5)	0.03	0.85	-0.36	0.7 (0.46-1.1)	2.8	0.095	-0.2	0.82 (0.59-1.2)	1.3	0.25	-0.2	0.82 (0.59-1.2)	1.3	0.25
Antigen processing and presentation	MHC I and II	CTSL	0.42	1.5 (1.2-1.9)	15	0.00011	0.23	1.3 (0.82-1.9)	1.1	0.29	0.29	1.3 (0.71-2.5)	0.82	0.37	0.49	1.6 (0.92-2.9)	2.8	0.096	0.36	1.4 (0.89-2.3)	2.2	0.14	0.36	1.4 (0.89-2.3)	2.2	0.14
Antigen processing and presentation	MHC I and II	CTSS	-0.23	0.79 (0.69-0.91)	10	0.0014	-0.41	0.67 (0.51-0.86)	9.4	0.0021	-0.5	0.61 (0.42-0.88)	6.9	0.0084	0.11	1.1 (0.75-1.7)	0.29	0.59	-0.34	0.71 (0.52-0.97)	4.8	0.029	-0.34	0.71 (0.52-0.97)	4.8	0.029
Antigen processing and presentation	MHC I and II	CTSV	0.19	1.2 (1-1.4)	5.4	0.02	-0.11	0.9 (0.66-1.2)	0.49	0.48	-0.15	0.86 (0.44-1.7)	0.2	0.66	0.86	2.4 (1-5.4)	4.2	0.042	0.77	2.2 (1.1-4.1)	5.6	0.018	0.77	2.2 (1.1-4.1)	5.6	0.018
Antigen processing and presentation	MHC I and II	SAR1B	0.18	1.2 (0.99-1.5)	3.3	0.07	-0.12	0.89 (0.59-1.3)	0.33	0.57	0.5	1.6 (1-2.7)	3.8	0.051	-0.1	0.9 (0.56-1.4)	0.18	0.67	0.52	1.7 (1.1-2.6)	5.7	0.017	0.52	1.7 (1.1-2.6)	5.7	0.017
Antigen processing and presentation	MHC I and II	SEC13	0.17	1.2 (0.88-1.6)	1.2	0.27	-0.031	0.97 (0.55-1.7)	0.01	0.91	-0.24	0.79 (0.37-1.7)	0.37	0.55	-0.64	0.53 (0.21-1.3)	1.8	0.18	0.044	1 (0.53-2)	0.02	0.9	0.044	1 (0.53-2)	0.02	0.9
Antigen processing and presentation	MHC I and II	SEC23A	0.2	1.2 (1-1.5)	5.3	0.022	0.4	1.5 (1.1-2.1)	5.6	0.018	0.51	1.7 (1-2.7)	4.2	0.04	0.29	1.3 (0.91-1.9)	2.2	0.14	0.18	1.2 (0.83-1.7)	0.95	0.33	0.18	1.2 (0.83-1.7)	0.95	0.33
Antigen processing and presentation	MHC I and II	SEC24A	0.34	1.4 (1.1-1.8)	6.6	0.01	-0.0015	1 (0.6-1.7)	0	1	0.23	1.3 (0.64-2.5)	0.45	0.5	0.71	2 (1.1-3.8)	5	0.026	0.47	1.6 (0.99-2.6)	3.6	0.057	0.47	1.6 (0.99-2.6)	3.6	0.057
Antigen processing and presentation	MHC I and II	SEC24B	0.31	1.4 (1-1.8)	4.5	0.034	0.97	2.6 (1.5-4.7)	11	0.00085	0.91	2.5 (1.1-5.4)	5.3	0.021	0.6	1.8 (0.88-3.8)	2.6	0.11	-0.22	0.8 (0.45-1.4)	0.57	0.45	-0.22	0.8 (0.45-1.4)	0.57	0.45
Antigen processing and presentation	MHC I and II	SEC24C	-0.33	0.72 (0.53-0.97)	4.5	0.033	-0.38	0.68 (0.4-1.2)	1.8	0.17	-0.32	0.72 (0.34-1.5)	0.69	0.41	-0.69	0.5 (0.25-1)	3.6	0.057	-0.32	0.73 (0.39-1.4)	0.97	0.32	-0.32	0.73 (0.39-1.4)	0.97	0.32
Antigen processing and presentation	MHC I and II	SEC24D	0.22	1.2 (1-1.5)	4.9	0.027	-0.11	0.9 (0.61-1.3)	0.31	0.58	0.44	1.6 (0.93-2.6)	2.8	0.096	0.62	1.9 (1.2-2.9)	7.6	0.0059	0.12	1.1 (0.81-1.6)	0.52	0.47	0.12	1.1 (0.81-1.6)	0.52	0.47
Antigen processing and presentation	MHC I and II	SEC31A	-0.0069	0.99 (0.74-1.3)	0	0.96	0.07	1.1 (0.6-1.9)	0.06	0.81	0.32	1.4 (0.7-2.7)	0.86	0.35	0.12	1.1 (0.54-2.4)	0.1	0.75	-0.25	0.78 (0.42-1.4)	0.67	0.41	-0.25	0.78 (0.42-1.4)	0.67	0.41
Antigen processing and presentation	MHC II	ACTR1A	-0.023	0.98 (0.7-1.4)	0.02	0.89	-0.22	0.8 (0.43-1.5)	0.51	0.47	-0.6	0.55 (0.23-1.3)	1.8	0.18	-0.14	0.87 (0.38-2)	0.12	0.73	-0.2	0.82 (0.41-1.6)	0.32	0.57	-0.2	0.82 (0.41-1.6)	0.32	0.57
Antigen processing and presentation	MHC II	ACTR1B	-0.31	0.74 (0.46-1.2)	1.7	0.2	0.66	1.9 (0.81-4.6)	2.2	0.14	-0.98	0.38 (0.11-1.3)	2.4	0.12	-1.1	0.34 (0.13-0.88)	4.9	0.026	0.14	1.2 (0.45-2.9)	0.09	0.76	0.14	1.2 (0.45-2.9)	0.09	0.76
Antigen processing and presentation	MHC II	AP1B1	0.29	1.3 (0.88-2)	1.8	0.18	-0.55	0.58 (0.25-1.3)	1.6	0.2	0.79	2.2 (0.64-7.6)	1.6	0.21	0.18	1.2 (0.45-3.2)	0.13	0.72	-0.27	0.77 (0.34-1.8)	0.39	0.53	-0.27	0.77 (0.34-1.8)	0.39	0.53
Antigen processing and presentation	MHC II	AP1G1	0.61	1.8 (1.4-2.5)	16	5.4e-05	-0.36	0.7 (0.36-1.4)	1.1	0.29	0.8	2.2 (1.1-4.6)	4.7	0.03	0.29	1.3 (0.58-3.1)	0.47	0.49	0.37	1.5 (0.84-2.5)	1.8	0.18	0.37	1.5 (0.84-2.5)	1.8	0.18
Antigen processing and presentation	MHC II	AP1M2	0.058	1.1 (0.85-1.3)	0.28	0.6	0.13	1.1 (0.77-1.7)	0.41	0.52	0.16	1.2 (0.65-2.1)	0.27	0.6	-0.41	0.66 (0.36-1.2)	1.8	0.18	-0.12	0.89 (0.54-1.4)	0.24	0.63	-0.12	0.89 (0.54-1.4)	0.24	0.63
Antigen processing and presentation	MHC II	AP1S1	0.0018	1 (0.74-1.4)	0	0.99	-0.41	0.66 (0.34-1.3)	1.5	0.22	-0.32	0.73 (0.37-1.4)	0.86	0.35	0.25	1.3 (0.63-2.6)	0.47	0.49	-0.24	0.79 (0.42-1.5)	0.55	0.46	-0.24	0.79 (0.42-1.5)	0.55	0.46
Antigen processing and presentation	MHC II	AP1S2	-0.2	0.82 (0.64-1.1)	2.4	0.12	-0.18	0.83 (0.53-1.3)	0.65	0.42	-0.16	0.85 (0.44-1.7)	0.22	0.64	0.047	1 (0.56-2)	0.02	0.88	-0.26	0.77 (0.47-1.3)	1	0.31	-0.26	0.77 (0.47-1.3)	1	0.31
Antigen processing and presentation	MHC II	AP2A2	-0.58	0.56 (0.4-0.79)	11	0.00084	-0.75	0.47 (0.24-0.94)	4.5	0.033	-0.65	0.52 (0.2-1.4)	1.8	0.18	-0.4	0.67 (0.29-1.5)	0.88	0.35	-0.15	0.86 (0.47-1.6)	0.24	0.62	-0.15	0.86 (0.47-1.6)	0.24	0.62
Antigen processing and presentation	MHC II	AP2B1	0.11	1.1 (0.9-1.4)	0.94	0.33	-0.4	0.67 (0.43-1.1)	3	0.086	0.43	1.5 (0.93-2.5)	2.9	0.091	-0.28	0.76 (0.44-1.3)	1	0.32	0.36	1.4 (0.93-2.2)	2.7	0.1	0.36	1.4 (0.93-2.2)	2.7	0.1
Antigen processing and presentation	MHC II	AP2M1	0.21	1.2 (0.93-1.7)	2.1	0.15	0.24	1.3 (0.76-2.1)	0.82	0.37	0.67	1.9 (1-3.7)	4.2	0.041	-0.53	0.59 (0.28-1.2)	2	0.16	0.069	1.1 (0.56-2.1)	0.04	0.84	0.069	1.1 (0.56-2.1)	0.04	0.84
Antigen processing and presentation	MHC II	AP2S1	0.16	1.2 (0.94-1.5)	1.9	0.17	0.0049	1 (0.64-1.6)	0	0.98	0.1	1.1 (0.63-2)	0.13	0.72	0.061	1.1 (0.63-1.8)	0.05	0.82	-0.26	0.77 (0.46-1.3)	1	0.31	-0.26	0.77 (0.46-1.3)	1	0.31
Antigen processing and presentation	MHC II	CD74	-0.34	0.71 (0.6-0.84)	16	6.3e-05	-0.31	0.73 (0.56-0.96)	5.1	0.024	-0.57	0.56 (0.36-0.87)	6.6	0.01	-0.064	0.94 (0.6-1.5)	0.08	0.78	-0.43	0.65 (0.47-0.9)	6.7	0.0097	-0.43	0.65 (0.47-0.9)	6.7	0.0097
Antigen processing and presentation	MHC II	CENPE	0.48	1.6 (1.3-2)	18	1.8e-05	0.13	1.1 (0.67-1.9)	0.23	0.63	-0.3	0.74 (0.37-1.5)	0.67	0.41	0.93	2.5 (1.1-5.8)	4.7	0.031	0.34	1.4 (0.83-2.4)	1.6	0.2	0.34	1.4 (0.83-2.4)	1.6	0.2
Antigen processing and presentation	MHC II	CLTA	0.072	1.1 (0.75-1.5)	0.16	0.69	0.13	1.1 (0.62-2.1)	0.18	0.67	0.15	1.2 (0.52-2.6)	0.13	0.71	0.049	1.1 (0.41-2.7)	0.01	0.92	-0.074	0.93 (0.45-1.9)	0.04	0.84	-0.074	0.93 (0.45-1.9)	0.04	0.84
Antigen processing and presentation	MHC II	CLTC	0.31	1.4 (0.99-1.9)	3.6	0.058	-0.1	0.9 (0.47-1.7)	0.1	0.75	0.11	1.1 (0.59-2.1)	0.12	0.73	0.35	1.4 (0.57-3.6)	0.57	0.45	0.16	1.2 (0.54-2.6)	0.16	0.69	0.16	1.2 (0.54-2.6)	0.16	0.69
Antigen processing and presentation	MHC II	CTSA	0.27	1.3 (0.99-1.7)	3.5	0.061	-0.36	0.7 (0.4-1.2)	1.5	0.22	0.27	1.3 (0.66-2.6)	0.6	0.44	-0.085	0.92 (0.45-1.9)	0.06	0.81	0.19	1.2 (0.68-2.2)	0.44	0.51	0.19	1.2 (0.68-2.2)	0.44	0.51
Antigen processing and presentation	MHC II	CTSB	0.0072	1 (0.83-1.2)	0.01	0.94	-0.17	0.84 (0.57-1.2)	0.75	0.39	-0.12	0.88 (0.52-1.5)	0.21	0.65	-0.13	0.88 (0.55-1.4)	0.3	0.59	0.11	1.1 (0.73-1.7)	0.26	0.61	0.11	1.1 (0.73-1.7)	0.26	0.61
Antigen processing and presentation	MHC II	CTSC	-0.13	0.88 (0.77-1)	3.2	0.076	-0.4	0.67 (0.5-0.89)	7.5	0.0062	-0.27	0.76 (0.51-1.1)	1.8	0.18	-0.019	0.98 (0.67-1.4)	0.01	0.92	-0.3	0.74 (0.57-0.98)	4.5	0.035	-0.3	0.74 (0.57-0.98)	4.5	0.035
Antigen processing and presentation	MHC II	CTSD	-0.0072	0.99 (0.84-1.2)	0.01	0.93	-0.43	0.65 (0.42-1)	3.7	0.055	-0.12	0.88 (0.53-1.5)	0.23	0.63	-0.033	0.97 (0.7-1.3)	0.04	0.84	-0.11	0.9 (0.64-1.3)	0.39	0.53	-0.11	0.9 (0.64-1.3)	0.39	0.53
Antigen processing and presentation	MHC II	CTSF	0.013	1 (0.79-1.3)	0.01	0.92	0.05	1.1 (0.58-1.9)	0.03	0.87	0.28	1.3 (0.62-2.8)	0.52	0.47	-0.065	0.94 (0.51-1.7)	0.04	0.84	0.27	1.3 (0.87-2)	1.7	0.2	0.27	1.3 (0.87-2)	1.7	0.2
Antigen processing and presentation	MHC II	CTSH	-0.21	0.81 (0.65-1)	3.4	0.067	-0.49	0.61 (0.4-0.94)	5.1	0.024	-0.27	0.76 (0.44-1.3)	0.91	0.34	-0.24	0.79 (0.44-1.4)	0.68	0.41	-0.19	0.83 (0.56-1.2)	0.91	0.34	-0.19	0.83 (0.56-1.2)	0.91	0.34
Antigen processing and presentation	MHC II	CTSK	-0.007	0.99 (0.87-1.1)	0.01	0.92	0.12	1.1 (0.87-1.5)	0.84	0.36	0.1	1.1 (0.69-1.8)	0.18	0.68	0.28	1.3 (0.97-1.8)	3.1	0.077	-0.14	0.87 (0.66-1.2)	0.9	0.34	-0.14	0.87 (0.66-1.2)	0.9	0.34
Antigen processing and presentation	MHC II	CTSO	-0.31	0.73 (0.59-0.91)	8	0.0046	-0.004	1 (0.61-1.6)	0	0.99	-0.11	0.89 (0.55-1.5)	0.21	0.65	-0.27	0.77 (0.42-1.4)	0.78	0.38	-0.2	0.82 (0.5-1.4)	0.61	0.44	-0.2	0.82 (0.5-1.4)	0.61	0.44
Antigen processing and presentation	MHC II	DCTN1	-0.36	0.7 (0.47-1)	3.1	0.079	-0.16	0.85 (0.38-1.9)	0.15	0.69	-1.4	0.26 (0.091-0.73)	6.5	0.011	-0.17	0.84 (0.36-2)	0.16	0.69	-0.13	0.88 (0.36-2.1)	0.08	0.77	-0.13	0.88 (0.36-2.1)	0.08	0.77
Antigen processing and presentation	MHC II	DCTN2	0.37	1.4 (0.95-2.2)	2.9	0.088	0.88	2.4 (1-5.6)	4.2	0.04	0.69	2 (0.69-5.7)	1.6	0.2	-0.53	0.59 (0.19-1.8)	0.85	0.36	0.3	1.3 (0.65-2.8)	0.64	0.43	0.3	1.3 (0.65-2.8)	0.64	0.43
Antigen processing and presentation	MHC II	DCTN3	0.058	1.1 (0.76-1.5)	0.12	0.73	0.049	1 (0.61-1.8)	0.03	0.86	0.058	1.1 (0.52-2.2)	0.03	0.87	-0.48	0.62 (0.28-1.4)	1.4	0.24	0.48	1.6 (0.84-3.1)	2.1	0.15	0.48	1.6 (0.84-3.1)	2.1	0.15
Antigen processing and presentation	MHC II	DCTN4	-0.3	0.74 (0.58-0.94)	5.9	0.015	-0.17	0.84 (0.48-1.5)	0.35	0.55	-0.31	0.73 (0.37-1.4)	0.82	0.37	-0.47	0.62 (0.36-1.1)	2.7	0.1	-0.15	0.86 (0.52-1.4)	0.34	0.56	-0.15	0.86 (0.52-1.4)	0.34	0.56
Antigen processing and presentation	MHC II	DCTN5	0.12	1.1 (0.88-1.4)	0.97	0.32	-0.61	0.54 (0.32-0.92)	5.2	0.022	0.68	2 (1-3.8)	4.1	0.043	-0.025	0.98 (0.49-1.9)	0	0.94	-0.063	0.94 (0.52-1.7)	0.04	0.84	-0.063	0.94 (0.52-1.7)	0.04	0.84
Antigen processing and presentation	MHC II	DCTN6	-0.027	0.97 (0.77-1.2)	0.05	0.82	0.11	1.1 (0.65-1.9)	0.16	0.69	0.48	1.6 (0.87-3)	2.3	0.13	-0.22	0.8 (0.46-1.4)	0.6	0.44	0.25	1.3 (0.88-1.9)	1.7	0.19	0.25	1.3 (0.88-1.9)	1.7	0.19
Antigen processing and presentation	MHC II	DNM1	0.19	1.2 (1-1.5)	3.7	0.055	0.25	1.3 (0.9-1.8)	1.9	0.17	0.6	1.8 (1.1-3.1)	4.8	0.028	0.16	1.2 (0.72-1.9)	0.43	0.51	0.65	1.9 (1.3-2.8)	12	0.00067	0.65	1.9 (1.3-2.8)	12	0.00067
Antigen processing and presentation	MHC II	DNM2	-0.18	0.84 (0.59-1.2)	1	0.31	-0.98	0.38 (0.18-0.77)	7.3	0.007	-0.042	0.96 (0.43-2.1)	0.01	0.92	-0.14	0.87 (0.39-2)	0.11	0.74	-0.5	0.6 (0.28-1.3)	1.6	0.2	-0.5	0.6 (0.28-1.3)	1.6	0.2
Antigen processing and presentation	MHC II	DNM3	0.24	1.3 (1-1.6)	4.4	0.035	0.37	1.5 (1.1-1.9)	7.7	0.0057	0.24	1.3 (0.59-2.8)	0.37	0.54	0.64	1.9 (0.8-4.5)	2.1	0.14	-0.11	0.9 (0.53-1.5)	0.17	0.68	-0.11	0.9 (0.53-1.5)	0.17	0.68
Antigen processing and presentation	MHC II	DYNC1H1	0.19	1.2 (0.87-1.7)	1.2	0.26	0.086	1.1 (0.64-1.9)	0.1	0.75	0.52	1.7 (0.74-3.8)	1.6	0.21	-0.79	0.46 (0.2-1.1)	3.3	0.068	0.62	1.9 (1-3.5)	3.8	0.052	0.62	1.9 (1-3.5)	3.8	0.052
Antigen processing and presentation	MHC II	DYNC1I1	0.16	1.2 (0.89-1.5)	1.2	0.27	0.16	1.2 (0.84-1.6)	0.91	0.34	0.53	1.7 (0.39-7.3)	0.5	0.48	0.12	1.1 (0.39-3.3)	0.05	0.82	0.49	1.6 (0.59-4.5)	0.89	0.34	0.49	1.6 (0.59-4.5)	0.89	0.34
Antigen processing and presentation	MHC II	DYNC1I2	-0.12	0.89 (0.67-1.2)	0.7	0.4	0.6	1.8 (0.97-3.4)	3.5	0.062	0.79	2.2 (0.94-5.2)	3.3	0.069	-0.64	0.53 (0.26-1.1)	3.1	0.077	0.097	1.1 (0.65-1.9)	0.13	0.72	0.097	1.1 (0.65-1.9)	0.13	0.72
Antigen processing and presentation	MHC II	DYNC1LI1	0.028	1 (0.82-1.3)	0.06	0.81	0.56	1.8 (1-3)	4	0.046	0.4	1.5 (0.79-2.8)	1.5	0.22	-0.46	0.63 (0.38-1)	3.3	0.068	0.22	1.2 (0.81-1.9)	0.98	0.32	0.22	1.2 (0.81-1.9)	0.98	0.32
Antigen processing and presentation	MHC II	DYNC1LI2	0.45	1.6 (1.2-2)	12	0.00055	-0.0053	0.99 (0.58-1.7)	0	0.98	1.4	4.1 (2.1-8.2)	16	5.9e-05	0.32	1.4 (0.73-2.6)	0.97	0.32	0.13	1.1 (0.71-1.8)	0.29	0.59	0.13	1.1 (0.71-1.8)	0.29	0.59
Antigen processing and presentation	MHC II	DYNLL1	0.56	1.8 (1.1-2.8)	6.1	0.014	0.53	1.7 (0.68-4.2)	1.3	0.25	0.12	1.1 (0.42-3)	0.06	0.81	0.68	2 (0.67-5.8)	1.5	0.21	0.32	1.4 (0.59-3.2)	0.53	0.47	0.32	1.4 (0.59-3.2)	0.53	0.47
Antigen processing and presentation	MHC II	KIF11	0.39	1.5 (1.3-1.7)	26	3.3e-07	0.055	1.1 (0.74-1.5)	0.09	0.76	0.0066	1 (0.64-1.6)	0	0.98	0.62	1.9 (1.1-3.2)	4.8	0.028	0.41	1.5 (1.1-2.2)	5	0.025	0.41	1.5 (1.1-2.2)	5	0.025
Antigen processing and presentation	MHC II	KIF15	0.45	1.6 (1.3-1.9)	21	4.3e-06	-0.063	0.94 (0.6-1.5)	0.08	0.78	-0.027	0.97 (0.55-1.7)	0.01	0.93	0.73	2.1 (0.98-4.4)	3.6	0.057	0.9	2.5 (1.5-4)	13	0.00028	0.9	2.5 (1.5-4)	13	0.00028
Antigen processing and presentation	MHC II	KIF18A	0.62	1.9 (1.3-2.7)	12	0.00066	-0.17	0.84 (0.4-1.8)	0.21	0.65	-0.39	0.67 (0.2-2.3)	0.4	0.53	1.5	4.5 (0.86-24)	3.2	0.074	1.2	3.5 (1.3-9.1)	6.5	0.011	1.2	3.5 (1.3-9.1)	6.5	0.011
Antigen processing and presentation	MHC II	KIF20A	0.33	1.4 (1.2-1.6)	18	2.2e-05	0.036	1 (0.71-1.5)	0.04	0.85	-0.07	0.93 (0.56-1.6)	0.07	0.79	0.28	1.3 (0.65-2.7)	0.59	0.44	0.51	1.7 (1.1-2.6)	4.9	0.027	0.51	1.7 (1.1-2.6)	4.9	0.027
Antigen processing and presentation	MHC II	KIF22	0.046	1 (0.78-1.4)	0.1	0.75	-0.64	0.53 (0.27-1)	3.3	0.068	-0.74	0.48 (0.21-1.1)	3	0.085	0.093	1.1 (0.54-2.2)	0.07	0.8	0.021	1 (0.6-1.8)	0.01	0.94	0.021	1 (0.6-1.8)	0.01	0.94
Antigen processing and presentation	MHC II	KIF23	0.5	1.7 (1.4-2)	27	1.8e-07	0.16	1.2 (0.81-1.7)	0.71	0.4	0.51	1.7 (0.83-3.3)	2.1	0.15	0.87	2.4 (1.1-5)	5.2	0.023	0.83	2.3 (1.3-4)	8.5	0.0036	0.83	2.3 (1.3-4)	8.5	0.0036
Antigen processing and presentation	MHC II	KIF2A	0.32	1.4 (1.1-1.7)	6.7	0.0095	0.32	1.4 (0.87-2.2)	1.8	0.18	0.28	1.3 (0.72-2.4)	0.82	0.37	-0.045	0.96 (0.49-1.9)	0.02	0.9	0.21	1.2 (0.79-1.9)	0.85	0.36	0.21	1.2 (0.79-1.9)	0.85	0.36
Antigen processing and presentation	MHC II	KIF2C	0.31	1.4 (1.2-1.6)	14	0.00023	-0.041	0.96 (0.6-1.5)	0.03	0.86	-0.4	0.67 (0.35-1.3)	1.5	0.23	0.61	1.8 (0.85-4)	2.4	0.12	0.092	1.1 (0.64-1.9)	0.11	0.73	0.092	1.1 (0.64-1.9)	0.11	0.73
Antigen processing and presentation	MHC II	KIF3A	0.4	1.5 (1.1-2.1)	5.8	0.016	0.62	1.9 (0.79-4.4)	2	0.16	0.0054	1 (0.4-2.5)	0	0.99	0.93	2.5 (1.2-5.4)	5.9	0.015	0.46	1.6 (0.86-2.9)	2.2	0.14	0.46	1.6 (0.86-2.9)	2.2	0.14
Antigen processing and presentation	MHC II	KIF3B	0.26	1.3 (1-1.6)	4.9	0.027	0.15	1.2 (0.71-1.9)	0.37	0.55	0.25	1.3 (0.8-2.1)	1.1	0.3	0.15	1.2 (0.62-2.2)	0.21	0.64	0.7	2 (1.2-3.3)	7.6	0.0057	0.7	2 (1.2-3.3)	7.6	0.0057
Antigen processing and presentation	MHC II	KIF3C	0.11	1.1 (0.79-1.6)	0.41	0.52	-0.34	0.71 (0.36-1.4)	0.91	0.34	-0.077	0.93 (0.35-2.5)	0.02	0.88	0.078	1.1 (0.46-2.6)	0.03	0.86	-0.31	0.73 (0.34-1.6)	0.66	0.42	-0.31	0.73 (0.34-1.6)	0.66	0.42
Antigen processing and presentation	MHC II	KIF4A	0.3	1.3 (1.2-1.6)	16	6.2e-05	-0.26	0.77 (0.52-1.1)	1.8	0.19	0.042	1 (0.59-1.8)	0.02	0.89	0.51	1.7 (0.93-3)	2.9	0.088	0.3	1.4 (0.91-2)	2.3	0.13	0.3	1.4 (0.91-2)	2.3	0.13
Antigen processing and presentation	MHC II	KIF5A	0.03	1 (0.64-1.7)	0.02	0.9	0.11	1.1 (0.41-3.1)	0.05	0.83	0.15	1.2 (0.33-4.1)	0.05	0.82	0.51	1.7 (0.58-4.8)	0.91	0.34	-0.55	0.58 (0.21-1.6)	1.1	0.3	-0.55	0.58 (0.21-1.6)	1.1	0.3
Antigen processing and presentation	MHC II	KIF5B	-0.1	0.9 (0.7-1.2)	0.66	0.42	-0.37	0.69 (0.42-1.1)	2.1	0.15	-0.25	0.78 (0.41-1.5)	0.56	0.45	-0.34	0.71 (0.38-1.3)	1.2	0.28	-0.073	0.93 (0.58-1.5)	0.09	0.76	-0.073	0.93 (0.58-1.5)	0.09	0.76
Antigen processing and presentation	MHC II	KLC1	-0.12	0.89 (0.7-1.1)	0.92	0.34	-0.029	0.97 (0.63-1.5)	0.02	0.9	-0.05	0.95 (0.54-1.7)	0.03	0.86	-0.48	0.62 (0.35-1.1)	2.7	0.1	0.0056	1 (0.62-1.6)	0	0.98	0.0056	1 (0.62-1.6)	0	0.98
Antigen processing and presentation	MHC II	KLC2	0.49	1.6 (1.1-2.4)	6.5	0.011	-0.14	0.87 (0.39-1.9)	0.11	0.74	0.84	2.3 (0.93-5.8)	3.2	0.073	-0.013	0.99 (0.37-2.7)	0	0.98	0.5	1.7 (0.8-3.4)	1.8	0.17	0.5	1.7 (0.8-3.4)	1.8	0.17
Antigen processing and presentation	MHC II	LAG3	-0.36	0.7 (0.51-0.95)	5.2	0.023	-1	0.35 (0.19-0.67)	10	0.0016	-0.65	0.52 (0.25-1.1)	3.1	0.079	0.36	1.4 (0.53-3.9)	0.51	0.47	-0.76	0.47 (0.22-0.98)	4.1	0.043	-0.76	0.47 (0.22-0.98)	4.1	0.043
Antigen processing and presentation	MHC II	LGMN	0.1	1.1 (0.91-1.3)	0.99	0.32	-0.17	0.84 (0.57-1.2)	0.76	0.38	0.099	1.1 (0.58-2.1)	0.09	0.76	0.59	1.8 (1.1-3)	4.8	0.028	-0.23	0.8 (0.5-1.3)	0.95	0.33	-0.23	0.8 (0.5-1.3)	0.95	0.33
Antigen processing and presentation	MHC II	OSBPL1A	-0.17	0.84 (0.72-0.99)	4.6	0.032	0.21	1.2 (0.89-1.7)	1.6	0.2	0.26	1.3 (0.86-2)	1.6	0.21	-0.33	0.72 (0.49-1.1)	2.7	0.1	-0.11	0.89 (0.66-1.2)	0.5	0.48	-0.11	0.89 (0.66-1.2)	0.5	0.48
Antigen processing and presentation	MHC II	RAB7A	0.15	1.2 (0.85-1.6)	0.84	0.36	0.13	1.1 (0.63-2.1)	0.18	0.67	0.004	1 (0.45-2.3)	0	0.99	-0.018	0.98 (0.45-2.1)	0	0.96	0.03	1 (0.53-2)	0.01	0.93	0.03	1 (0.53-2)	0.01	0.93
Antigen processing and presentation	MHC II	RACGAP1	0.48	1.6 (1.4-1.9)	40	2.7e-10	0.15	1.2 (0.77-1.8)	0.53	0.47	0.31	1.4 (0.83-2.2)	1.5	0.22	0.79	2.2 (1.4-3.5)	11	0.0011	0.64	1.9 (1.2-3)	7.7	0.0055	0.64	1.9 (1.2-3)	7.7	0.0055
Antigen processing and presentation	MHC II	SH3GL2	0.0068	1 (0.64-1.6)	0	0.98	-0.065	0.94 (0.43-2)	0.03	0.87	-0.84	0.43 (0.077-2.4)	0.9	0.34	-0.39	0.68 (0.22-2.1)	0.45	0.5	0.48	1.6 (0.68-3.9)	1.2	0.27	0.48	1.6 (0.68-3.9)	1.2	0.27
Antigen processing and presentation	MHC II	SPTBN2	0.19	1.2 (0.89-1.7)	1.5	0.22	-0.48	0.62 (0.31-1.2)	1.8	0.18	-0.27	0.76 (0.29-2)	0.3	0.58	0.3	1.3 (0.64-2.8)	0.6	0.44	-0.045	0.96 (0.53-1.7)	0.02	0.88	-0.045	0.96 (0.53-1.7)	0.02	0.88
Antigen processing and presentation	Proteasome	ANAPC10	0.34	1.4 (1.1-1.8)	6.6	0.01	0.34	1.4 (0.85-2.3)	1.7	0.19	0.52	1.7 (0.97-2.9)	3.4	0.065	0.55	1.7 (0.95-3.2)	3.2	0.075	-0.13	0.88 (0.53-1.5)	0.24	0.63	-0.13	0.88 (0.53-1.5)	0.24	0.63
Antigen processing and presentation	Proteasome	ANAPC13	0.12	1.1 (0.83-1.5)	0.55	0.46	0.64	1.9 (1-3.5)	4.2	0.041	0.75	2.1 (1-4.4)	4.1	0.042	-0.58	0.56 (0.25-1.3)	1.9	0.17	-0.12	0.89 (0.45-1.8)	0.11	0.73	-0.12	0.89 (0.45-1.8)	0.11	0.73
Antigen processing and presentation	Proteasome	ANAPC2	0.19	1.2 (0.88-1.7)	1.4	0.24	0.39	1.5 (0.78-2.8)	1.4	0.23	-0.21	0.81 (0.4-1.7)	0.32	0.57	0.058	1.1 (0.47-2.4)	0.02	0.89	0.55	1.7 (0.91-3.3)	2.8	0.093	0.55	1.7 (0.91-3.3)	2.8	0.093
Antigen processing and presentation	Proteasome	ANAPC5	-0.18	0.84 (0.65-1.1)	1.9	0.16	-0.25	0.78 (0.47-1.3)	0.87	0.35	-0.54	0.58 (0.3-1.1)	2.6	0.11	-0.011	0.99 (0.55-1.8)	0	0.97	-0.36	0.69 (0.42-1.1)	2	0.15	-0.36	0.69 (0.42-1.1)	2	0.15
Antigen processing and presentation	Proteasome	AREL1	-0.34	0.71 (0.53-0.95)	5.2	0.022	-0.56	0.57 (0.31-1)	3.3	0.069	-0.059	0.94 (0.47-1.9)	0.03	0.87	-0.45	0.64 (0.32-1.3)	1.5	0.22	-0.068	0.93 (0.52-1.7)	0.05	0.82	-0.068	0.93 (0.52-1.7)	0.05	0.82
Antigen processing and presentation	Proteasome	ARIH2	-0.031	0.97 (0.71-1.3)	0.04	0.85	0.34	1.4 (0.7-2.8)	0.91	0.34	-0.2	0.82 (0.38-1.8)	0.26	0.61	-0.69	0.5 (0.25-1)	3.8	0.052	0.26	1.3 (0.77-2.2)	0.97	0.32	0.26	1.3 (0.77-2.2)	0.97	0.32
Antigen processing and presentation	Proteasome	ASB1	-0.25	0.78 (0.48-1.3)	1	0.31	0.59	1.8 (0.74-4.4)	1.7	0.19	-0.81	0.44 (0.14-1.4)	1.8	0.17	0.17	1.2 (0.38-3.8)	0.09	0.77	0.0019	1 (0.33-3)	0	1	0.0019	1 (0.33-3)	0	1
Antigen processing and presentation	Proteasome	ASB13	-0.038	0.96 (0.79-1.2)	0.15	0.7	0.026	1 (0.61-1.7)	0.01	0.92	0.43	1.5 (0.92-2.5)	2.7	0.099	-0.25	0.78 (0.48-1.3)	1	0.31	-0.17	0.85 (0.58-1.2)	0.75	0.39	-0.17	0.85 (0.58-1.2)	0.75	0.39
Antigen processing and presentation	Proteasome	ASB4	-0.29	0.75 (0.37-1.5)	0.65	0.42	-0.52	0.59 (0.12-2.9)	0.41	0.52	-0.63	0.53 (0.078-3.6)	0.41	0.52	-0.24	0.79 (0.18-3.4)	0.1	0.75	-0.19	0.83 (0.18-3.7)	0.06	0.8	-0.19	0.83 (0.18-3.7)	0.06	0.8
Antigen processing and presentation	Proteasome	ASB6	0.35	1.4 (0.9-2.2)	2.3	0.13	0.27	1.3 (0.54-3.2)	0.35	0.55	0.46	1.6 (0.54-4.6)	0.69	0.41	-0.19	0.83 (0.3-2.3)	0.13	0.72	0.24	1.3 (0.54-3)	0.29	0.59	0.24	1.3 (0.54-3)	0.29	0.59
Antigen processing and presentation	Proteasome	ASB7	0.12	1.1 (0.68-1.9)	0.22	0.64	0.11	1.1 (0.43-2.9)	0.05	0.82	0.051	1.1 (0.35-3.1)	0.01	0.93	-0.46	0.63 (0.18-2.2)	0.53	0.47	0.21	1.2 (0.38-4.1)	0.13	0.72	0.21	1.2 (0.38-4.1)	0.13	0.72
Antigen processing and presentation	Proteasome	ASB8	-0.27	0.76 (0.51-1.2)	1.6	0.2	-0.66	0.51 (0.21-1.3)	2	0.16	-0.41	0.66 (0.23-1.9)	0.58	0.45	0.035	1 (0.38-2.8)	0	0.94	0.21	1.2 (0.51-3)	0.21	0.65	0.21	1.2 (0.51-3)	0.21	0.65
Antigen processing and presentation	Proteasome	ASB9	0.22	1.2 (0.78-2)	0.85	0.36	-0.56	0.57 (0.21-1.5)	1.2	0.27	0.46	1.6 (0.43-5.9)	0.48	0.49	0.27	1.3 (0.41-4.2)	0.2	0.65	0.39	1.5 (0.8-2.7)	1.6	0.21	0.39	1.5 (0.8-2.7)	1.6	0.21
Antigen processing and presentation	Proteasome	ATG7	-0.24	0.79 (0.54-1.1)	1.5	0.22	-0.46	0.63 (0.35-1.1)	2.3	0.13	-0.64	0.53 (0.23-1.2)	2.2	0.14	0.16	1.2 (0.42-3.3)	0.09	0.77	-0.017	0.98 (0.4-2.4)	0	0.97	-0.017	0.98 (0.4-2.4)	0	0.97
Antigen processing and presentation	Proteasome	BLMH	-0.14	0.87 (0.7-1.1)	1.6	0.21	-0.11	0.89 (0.53-1.5)	0.18	0.67	-0.034	0.97 (0.63-1.5)	0.02	0.87	-0.18	0.83 (0.5-1.4)	0.5	0.48	-0.11	0.89 (0.64-1.3)	0.42	0.52	-0.11	0.89 (0.64-1.3)	0.42	0.52
Antigen processing and presentation	Proteasome	BTBD1	-0.0088	0.99 (0.77-1.3)	0	0.94	0.25	1.3 (0.82-2)	1.2	0.28	0.57	1.8 (0.96-3.3)	3.3	0.069	-0.31	0.74 (0.4-1.4)	0.93	0.33	-0.13	0.88 (0.52-1.5)	0.24	0.62	-0.13	0.88 (0.52-1.5)	0.24	0.62
Antigen processing and presentation	Proteasome	BTRC	-0.54	0.58 (0.38-0.91)	5.8	0.016	-0.56	0.57 (0.18-1.8)	0.9	0.34	-0.68	0.51 (0.098-2.6)	0.65	0.42	-1	0.37 (0.16-0.87)	5.1	0.023	-0.09	0.91 (0.39-2.1)	0.04	0.83	-0.09	0.91 (0.39-2.1)	0.04	0.83
Antigen processing and presentation	Proteasome	CBLB	0.14	1.1 (0.89-1.5)	1.1	0.3	0.23	1.3 (0.82-2)	1.1	0.29	0.22	1.2 (0.61-2.5)	0.36	0.55	0.3	1.4 (0.73-2.5)	0.91	0.34	0.14	1.1 (0.65-2)	0.23	0.63	0.14	1.1 (0.65-2)	0.23	0.63
Antigen processing and presentation	Proteasome	CCNF	0.55	1.7 (1.2-2.4)	10	0.0013	-0.15	0.86 (0.39-1.9)	0.13	0.72	0.19	1.2 (0.55-2.6)	0.22	0.64	-0.31	0.73 (0.28-1.9)	0.38	0.54	0.44	1.6 (0.76-3.2)	1.5	0.22	0.44	1.6 (0.76-3.2)	1.5	0.22
Antigen processing and presentation	Proteasome	CDC16	-0.25	0.78 (0.59-1)	3	0.081	0.21	1.2 (0.74-2.1)	0.67	0.41	-0.065	0.94 (0.47-1.9)	0.03	0.85	-0.55	0.58 (0.28-1.2)	2.2	0.14	-0.15	0.86 (0.52-1.4)	0.33	0.57	-0.15	0.86 (0.52-1.4)	0.33	0.57
Antigen processing and presentation	Proteasome	CDC20	0.25	1.3 (1.1-1.4)	19	1.3e-05	0.061	1.1 (0.75-1.5)	0.12	0.73	-0.16	0.85 (0.54-1.3)	0.47	0.49	0.25	1.3 (0.82-2)	1.2	0.28	0.44	1.6 (0.98-2.5)	3.5	0.061	0.44	1.6 (0.98-2.5)	3.5	0.061
Antigen processing and presentation	Proteasome	CDC23	0.28	1.3 (1-1.7)	4.6	0.033	0.34	1.4 (0.82-2.4)	1.5	0.21	0.36	1.4 (0.78-2.6)	1.3	0.25	0.34	1.4 (0.79-2.5)	1.4	0.25	0.34	1.4 (0.78-2.5)	1.3	0.26	0.34	1.4 (0.78-2.5)	1.3	0.26
Antigen processing and presentation	Proteasome	CDC27	0.0031	1 (0.8-1.3)	0	0.98	-0.25	0.78 (0.48-1.3)	1	0.32	-0.28	0.75 (0.46-1.2)	1.2	0.27	0.21	1.2 (0.69-2.2)	0.51	0.48	-0.098	0.91 (0.57-1.4)	0.18	0.68	-0.098	0.91 (0.57-1.4)	0.18	0.68
Antigen processing and presentation	Proteasome	CDC34	0.1	1.1 (0.85-1.4)	0.59	0.44	0.17	1.2 (0.69-2)	0.39	0.53	0.022	1 (0.55-1.9)	0	0.95	-0.032	0.97 (0.52-1.8)	0.01	0.92	-0.37	0.69 (0.42-1.1)	2.2	0.13	-0.37	0.69 (0.42-1.1)	2.2	0.13
Antigen processing and presentation	Proteasome	CUL1	-0.37	0.69 (0.52-0.91)	6.7	0.0098	-0.44	0.64 (0.4-1)	3.4	0.066	-0.18	0.83 (0.38-1.8)	0.22	0.64	-0.12	0.89 (0.42-1.9)	0.09	0.76	-0.68	0.51 (0.29-0.88)	5.8	0.016	-0.68	0.51 (0.29-0.88)	5.8	0.016
Antigen processing and presentation	Proteasome	CUL2	0.03	1 (0.73-1.5)	0.03	0.86	-0.035	0.97 (0.52-1.8)	0.01	0.91	0.34	1.4 (0.57-3.4)	0.53	0.47	-0.065	0.94 (0.38-2.3)	0.02	0.89	-0.14	0.87 (0.39-1.9)	0.12	0.73	-0.14	0.87 (0.39-1.9)	0.12	0.73
Antigen processing and presentation	Proteasome	CUL3	-0.026	0.97 (0.7-1.4)	0.02	0.87	0.074	1.1 (0.52-2.2)	0.04	0.84	0.32	1.4 (0.56-3.4)	0.49	0.48	0.2	1.2 (0.57-2.6)	0.25	0.61	-0.2	0.81 (0.39-1.7)	0.31	0.58	-0.2	0.81 (0.39-1.7)	0.31	0.58
Antigen processing and presentation	Proteasome	CUL5	0.1	1.1 (0.87-1.4)	0.69	0.41	0.77	2.2 (1.3-3.6)	9	0.0026	0.41	1.5 (0.77-3)	1.4	0.23	-0.062	0.94 (0.52-1.7)	0.04	0.84	0.022	1 (0.65-1.6)	0.01	0.93	0.022	1 (0.65-1.6)	0.01	0.93
Antigen processing and presentation	Proteasome	DET1	-0.023	0.98 (0.74-1.3)	0.02	0.87	-0.18	0.83 (0.47-1.5)	0.4	0.53	0.11	1.1 (0.56-2.2)	0.1	0.76	-0.005	0.99 (0.53-1.9)	0	0.99	0.51	1.7 (0.87-3.2)	2.4	0.12	0.51	1.7 (0.87-3.2)	2.4	0.12
Antigen processing and presentation	Proteasome	DZIP3	0.094	1.1 (0.89-1.3)	0.81	0.37	0.13	1.1 (0.63-2.1)	0.18	0.67	0.088	1.1 (0.7-1.7)	0.15	0.69	-0.022	0.98 (0.6-1.6)	0.01	0.93	0.33	1.4 (0.97-2)	3.2	0.075	0.33	1.4 (0.97-2)	3.2	0.075
Antigen processing and presentation	Proteasome	ELOB	0.48	1.6 (1.2-2.2)	8.6	0.0033	0.36	1.4 (0.73-2.8)	1.1	0.29	1.3	3.5 (1.4-8.6)	7.4	0.0064	-0.095	0.91 (0.4-2.1)	0.05	0.82	0.58	1.8 (0.92-3.5)	3	0.086	0.58	1.8 (0.92-3.5)	3	0.086
Antigen processing and presentation	Proteasome	ELOC	0.29	1.3 (1.1-1.6)	12	0.00042	-0.032	0.97 (0.68-1.4)	0.03	0.86	0.17	1.2 (0.75-1.9)	0.5	0.48	0.17	1.2 (0.79-1.8)	0.68	0.41	0.29	1.3 (0.95-1.9)	2.8	0.096	0.29	1.3 (0.95-1.9)	2.8	0.096
Antigen processing and presentation	Proteasome	FBXL12	0.049	1 (0.72-1.5)	0.06	0.8	-0.36	0.7 (0.34-1.4)	0.99	0.32	0.89	2.4 (0.99-6)	3.7	0.053	0.57	1.8 (0.69-4.6)	1.4	0.24	0.24	1.3 (0.57-2.8)	0.34	0.56	0.24	1.3 (0.57-2.8)	0.34	0.56
Antigen processing and presentation	Proteasome	FBXL14	0.079	1.1 (0.84-1.4)	0.37	0.54	0.075	1.1 (0.74-1.6)	0.15	0.7	0.14	1.2 (0.61-2.2)	0.19	0.67	-0.17	0.84 (0.41-1.7)	0.22	0.64	0.23	1.3 (0.77-2.1)	0.82	0.36	0.23	1.3 (0.77-2.1)	0.82	0.36
Antigen processing and presentation	Proteasome	FBXL15	0.16	1.2 (0.86-1.6)	1	0.31	0.2	1.2 (0.59-2.5)	0.29	0.59	0.11	1.1 (0.44-2.8)	0.06	0.81	-0.25	0.78 (0.36-1.7)	0.43	0.51	0.36	1.4 (0.79-2.6)	1.4	0.23	0.36	1.4 (0.79-2.6)	1.4	0.23
Antigen processing and presentation	Proteasome	FBXL18	0.067	1.1 (0.76-1.5)	0.14	0.7	-0.73	0.48 (0.23-1)	3.7	0.055	0.27	1.3 (0.65-2.7)	0.56	0.45	0.012	1 (0.47-2.2)	0	0.98	0.31	1.4 (0.69-2.7)	0.79	0.37	0.31	1.4 (0.69-2.7)	0.79	0.37
Antigen processing and presentation	Proteasome	FBXL4	0.43	1.5 (1.1-2.1)	7	0.0083	0.67	2 (1.3-3)	9.2	0.0024	0.8	2.2 (0.98-5)	3.7	0.055	0.19	1.2 (0.51-2.9)	0.18	0.67	-0.14	0.87 (0.43-1.8)	0.15	0.7	-0.14	0.87 (0.43-1.8)	0.15	0.7
Antigen processing and presentation	Proteasome	FBXL5	-0.074	0.93 (0.76-1.1)	0.52	0.47	0.0076	1 (0.62-1.6)	0	0.98	0.19	1.2 (0.66-2.2)	0.37	0.54	-0.027	0.97 (0.53-1.8)	0.01	0.93	0.024	1 (0.64-1.6)	0.01	0.92	0.024	1 (0.64-1.6)	0.01	0.92
Antigen processing and presentation	Proteasome	FBXL7	0.022	1 (0.85-1.2)	0.06	0.81	0.25	1.3 (0.72-2.3)	0.72	0.4	0.0012	1 (0.53-1.9)	0	1	0.012	1 (0.66-1.6)	0	0.96	0.18	1.2 (0.89-1.6)	1.4	0.23	0.18	1.2 (0.89-1.6)	1.4	0.23
Antigen processing and presentation	Proteasome	FBXL8	0.15	1.2 (0.69-2)	0.33	0.57	-0.066	0.94 (0.3-2.9)	0.01	0.91	0.74	2.1 (0.83-5.3)	2.4	0.12	-0.6	0.55 (0.16-1.9)	0.92	0.34	-0.21	0.81 (0.26-2.6)	0.13	0.72	-0.21	0.81 (0.26-2.6)	0.13	0.72
Antigen processing and presentation	Proteasome	FBXO17	0.034	1 (0.79-1.4)	0.06	0.8	0.071	1.1 (0.72-1.6)	0.12	0.73	0.4	1.5 (0.64-3.4)	0.86	0.35	0.37	1.5 (0.67-3.1)	0.91	0.34	-0.19	0.83 (0.48-1.4)	0.5	0.48	-0.19	0.83 (0.48-1.4)	0.5	0.48
Antigen processing and presentation	Proteasome	FBXO2	-0.043	0.96 (0.78-1.2)	0.18	0.67	-0.32	0.73 (0.48-1.1)	2.1	0.14	0.22	1.2 (0.73-2.1)	0.65	0.42	0.15	1.2 (0.77-1.7)	0.52	0.47	-0.02	0.98 (0.72-1.3)	0.02	0.9	-0.02	0.98 (0.72-1.3)	0.02	0.9
Antigen processing and presentation	Proteasome	FBXO21	0.15	1.2 (0.91-1.5)	1.5	0.23	0.11	1.1 (0.69-1.8)	0.18	0.67	0.1	1.1 (0.63-1.9)	0.12	0.73	0.13	1.1 (0.61-2.1)	0.17	0.68	0.22	1.3 (0.75-2.1)	0.75	0.39	0.22	1.3 (0.75-2.1)	0.75	0.39
Antigen processing and presentation	Proteasome	FBXO22	0.75	2.1 (0.88-5)	2.8	0.094	0.24	1.3 (0.24-6.8)	0.08	0.78	2	7.2 (0.88-59)	3.4	0.065	-0.49	0.61 (0.072-5.2)	0.2	0.65	1.5	4.3 (0.71-26)	2.5	0.11	1.5	4.3 (0.71-26)	2.5	0.11
Antigen processing and presentation	Proteasome	FBXO31	0.028	1 (0.57-1.9)	0.01	0.93	-0.75	0.47 (0.12-1.9)	1.2	0.28	0.0058	1 (0.27-3.8)	0	0.99	1	2.7 (0.71-10)	2.1	0.14	-0.28	0.76 (0.24-2.4)	0.22	0.64	-0.28	0.76 (0.24-2.4)	0.22	0.64
Antigen processing and presentation	Proteasome	FBXO40	-0.058	0.94 (0.49-1.8)	0.03	0.86	-0.95	0.39 (0.087-1.7)	1.6	0.21	-1.4	0.26 (0.055-1.2)	3	0.083	0.12	1.1 (0.29-4.4)	0.03	0.86	0.11	1.1 (0.28-4.5)	0.03	0.87	0.11	1.1 (0.28-4.5)	0.03	0.87
Antigen processing and presentation	Proteasome	FBXO41	0.84	2.3 (1.5-3.7)	13	0.00034	0.28	1.3 (0.49-3.5)	0.31	0.58	0.52	1.7 (0.5-5.7)	0.7	0.4	1.1	2.9 (1-8)	4.1	0.043	1.2	3.3 (1.4-8)	7.4	0.0066	1.2	3.3 (1.4-8)	7.4	0.0066
Antigen processing and presentation	Proteasome	FBXO7	-0.65	0.52 (0.35-0.78)	10	0.0015	-0.84	0.43 (0.18-1)	3.8	0.052	0.38	1.5 (0.62-3.4)	0.75	0.39	-1.3	0.27 (0.11-0.67)	8.1	0.0045	-0.81	0.45 (0.21-0.95)	4.3	0.038	-0.81	0.45 (0.21-0.95)	4.3	0.038
Antigen processing and presentation	Proteasome	FBXO9	-0.11	0.89 (0.68-1.2)	0.7	0.4	0.083	1.1 (0.62-1.9)	0.08	0.77	-0.16	0.86 (0.43-1.7)	0.2	0.65	-0.0087	0.99 (0.54-1.8)	0	0.98	-0.12	0.89 (0.56-1.4)	0.24	0.63	-0.12	0.89 (0.56-1.4)	0.24	0.63
Antigen processing and presentation	Proteasome	FBXW11	0.17	1.2 (0.85-1.6)	1	0.31	0.68	2 (1-3.7)	4.4	0.035	0.16	1.2 (0.55-2.5)	0.17	0.68	-0.3	0.74 (0.33-1.6)	0.55	0.46	0.082	1.1 (0.56-2.1)	0.06	0.81	0.082	1.1 (0.56-2.1)	0.06	0.81
Antigen processing and presentation	Proteasome	FBXW12	0.41	1.5 (1.1-2)	8.8	0.003	0.61	1.8 (1.1-3.2)	4.8	0.028	0.42	1.5 (0.85-2.7)	2	0.16	0.51	1.7 (0.88-3.2)	2.5	0.11	0.65	1.9 (1.1-3.4)	4.8	0.028	0.65	1.9 (1.1-3.4)	4.8	0.028
Antigen processing and presentation	Proteasome	FBXW2	-0.077	0.93 (0.76-1.1)	0.56	0.45	0.19	1.2 (0.82-1.8)	0.94	0.33	-0.15	0.86 (0.53-1.4)	0.36	0.55	0.015	1 (0.56-1.8)	0	0.96	-0.25	0.78 (0.47-1.3)	0.97	0.33	-0.25	0.78 (0.47-1.3)	0.97	0.33
Antigen processing and presentation	Proteasome	FBXW4	-0.66	0.51 (0.38-0.69)	20	1e-05	-0.17	0.85 (0.41-1.7)	0.21	0.65	-0.31	0.73 (0.32-1.7)	0.53	0.46	-1.4	0.24 (0.11-0.53)	13	0.00035	-0.69	0.5 (0.25-1)	3.7	0.055	-0.69	0.5 (0.25-1)	3.7	0.055
Antigen processing and presentation	Proteasome	FBXW7	-0.026	0.97 (0.72-1.3)	0.03	0.87	0.12	1.1 (0.66-1.9)	0.19	0.66	-0.15	0.86 (0.42-1.7)	0.18	0.67	0.074	1.1 (0.47-2.5)	0.03	0.86	0.085	1.1 (0.53-2.2)	0.05	0.82	0.085	1.1 (0.53-2.2)	0.05	0.82
Antigen processing and presentation	Proteasome	FZR1	-0.052	0.95 (0.63-1.4)	0.06	0.81	0.039	1 (0.44-2.5)	0.01	0.93	0.69	2 (0.71-5.6)	1.7	0.19	-0.85	0.43 (0.17-1.1)	3.4	0.066	-0.017	0.98 (0.43-2.3)	0	0.97	-0.017	0.98 (0.43-2.3)	0	0.97
Antigen processing and presentation	Proteasome	GAN	0.82	2.3 (1.1-4.6)	5	0.025	0.39	1.5 (0.48-4.6)	0.46	0.5	2.3	10 (1.4-72)	5.4	0.021	-0.0084	0.99 (0.087-11)	0	0.99	0.46	1.6 (0.28-9)	0.27	0.6	0.46	1.6 (0.28-9)	0.27	0.6
Antigen processing and presentation	Proteasome	HECTD3	-0.18	0.83 (0.61-1.1)	1.2	0.26	-0.12	0.88 (0.5-1.6)	0.18	0.67	0.18	1.2 (0.66-2.2)	0.35	0.55	-1.1	0.35 (0.14-0.88)	4.9	0.026	-0.1	0.9 (0.47-1.7)	0.1	0.75	-0.1	0.9 (0.47-1.7)	0.1	0.75
Antigen processing and presentation	Proteasome	HERC1	0.039	1 (0.81-1.3)	0.1	0.76	0.17	1.2 (0.74-1.9)	0.48	0.49	0.55	1.7 (0.95-3.1)	3.3	0.071	-0.072	0.93 (0.54-1.6)	0.07	0.8	0.29	1.3 (0.79-2.2)	1.2	0.28	0.29	1.3 (0.79-2.2)	1.2	0.28
Antigen processing and presentation	Proteasome	HERC2	0.059	1.1 (0.85-1.3)	0.29	0.59	0.19	1.2 (0.84-1.7)	1.1	0.3	0.2	1.2 (0.73-2.1)	0.58	0.45	0.24	1.3 (0.71-2.3)	0.67	0.41	0.17	1.2 (0.75-1.9)	0.53	0.47	0.17	1.2 (0.75-1.9)	0.53	0.47
Antigen processing and presentation	Proteasome	HERC5	0.024	1 (0.89-1.2)	0.11	0.74	-0.089	0.92 (0.7-1.2)	0.42	0.52	-0.14	0.87 (0.61-1.2)	0.58	0.45	0.037	1 (0.69-1.6)	0.03	0.86	-0.099	0.91 (0.66-1.2)	0.39	0.53	-0.099	0.91 (0.66-1.2)	0.39	0.53
Antigen processing and presentation	Proteasome	HERC6	0.066	1.1 (0.94-1.2)	1.1	0.3	-0.049	0.95 (0.73-1.2)	0.13	0.72	-0.11	0.89 (0.67-1.2)	0.57	0.45	0.12	1.1 (0.86-1.5)	0.79	0.37	-0.061	0.94 (0.74-1.2)	0.24	0.63	-0.061	0.94 (0.74-1.2)	0.24	0.63
Antigen processing and presentation	Proteasome	HUWE1	-0.14	0.87 (0.65-1.2)	0.91	0.34	-0.49	0.62 (0.37-1)	3.6	0.056	0.022	1 (0.49-2.2)	0	0.95	-0.11	0.89 (0.44-1.8)	0.09	0.76	-0.23	0.8 (0.43-1.5)	0.51	0.47	-0.23	0.8 (0.43-1.5)	0.51	0.47
Antigen processing and presentation	Proteasome	ITCH	0.2	1.2 (0.87-1.7)	1.3	0.25	-0.48	0.62 (0.3-1.2)	1.8	0.18	-0.19	0.83 (0.32-2.2)	0.15	0.7	-0.39	0.68 (0.24-1.9)	0.55	0.46	0.022	1 (0.44-2.4)	0	0.96	0.022	1 (0.44-2.4)	0	0.96
Antigen processing and presentation	Proteasome	KEAP1	-0.23	0.8 (0.57-1.1)	1.8	0.18	-0.2	0.82 (0.45-1.5)	0.4	0.53	0.5	1.7 (0.73-3.8)	1.4	0.23	-0.57	0.56 (0.23-1.4)	1.6	0.21	-0.16	0.85 (0.44-1.6)	0.23	0.63	-0.16	0.85 (0.44-1.6)	0.23	0.63
Antigen processing and presentation	Proteasome	KLHL2	0.11	1.1 (0.92-1.4)	1.3	0.26	0.37	1.4 (0.94-2.2)	2.8	0.093	0.15	1.2 (0.73-1.9)	0.39	0.53	0.51	1.7 (1-2.7)	4.2	0.04	0.14	1.2 (0.77-1.7)	0.47	0.49	0.14	1.2 (0.77-1.7)	0.47	0.49
Antigen processing and presentation	Proteasome	KLHL20	0.43	1.5 (1-2.3)	4.7	0.029	0.56	1.7 (0.83-3.7)	2.1	0.14	0.95	2.6 (1-6.6)	3.9	0.049	0.77	2.2 (0.95-4.9)	3.4	0.065	0.84	2.3 (0.98-5.5)	3.6	0.057	0.84	2.3 (0.98-5.5)	3.6	0.057
Antigen processing and presentation	Proteasome	KLHL21	-0.13	0.88 (0.66-1.2)	0.85	0.36	0.096	1.1 (0.67-1.8)	0.15	0.7	0.3	1.4 (0.59-3.1)	0.51	0.48	-0.28	0.76 (0.34-1.7)	0.46	0.5	-0.084	0.92 (0.52-1.6)	0.08	0.78	-0.084	0.92 (0.52-1.6)	0.08	0.78
Antigen processing and presentation	Proteasome	KLHL22	0.081	1.1 (0.75-1.6)	0.19	0.66	0.2	1.2 (0.6-2.5)	0.3	0.58	-0.36	0.7 (0.3-1.6)	0.71	0.4	0.046	1 (0.47-2.3)	0.01	0.91	-0.2	0.82 (0.38-1.8)	0.27	0.61	-0.2	0.82 (0.38-1.8)	0.27	0.61
Antigen processing and presentation	Proteasome	KLHL25	0.64	1.9 (1.2-3.1)	6.4	0.011	-0.66	0.52 (0.19-1.4)	1.7	0.19	1.3	3.7 (1.2-11)	5.1	0.024	-0.015	0.99 (0.3-3.2)	0	0.98	0.92	2.5 (0.86-7.3)	2.8	0.094	0.92	2.5 (0.86-7.3)	2.8	0.094
Antigen processing and presentation	Proteasome	KLHL3	-0.064	0.94 (0.67-1.3)	0.13	0.71	0.43	1.5 (0.83-2.9)	1.9	0.17	0.31	1.4 (0.56-3.3)	0.47	0.5	-0.18	0.83 (0.34-2.1)	0.15	0.69	0.44	1.6 (0.74-3.3)	1.4	0.24	0.44	1.6 (0.74-3.3)	1.4	0.24
Antigen processing and presentation	Proteasome	KLHL41	-0.34	0.71 (0.33-1.5)	0.79	0.38	-0.092	0.91 (0.089-9.4)	0.01	0.94	1.6	5.2 (0.43-63)	1.7	0.19	0.35	1.4 (0.19-10)	0.12	0.73	0.13	1.1 (0.44-2.9)	0.07	0.79	0.13	1.1 (0.44-2.9)	0.07	0.79
Antigen processing and presentation	Proteasome	KLHL5	1.1	3 (1.5-6.1)	9.5	0.0021	1.5	4.3 (1.3-14)	6	0.014	1.8	6.2 (0.5-79)	2	0.16	0.072	1.1 (0.14-8.1)	0	0.94	1.3	3.7 (0.55-25)	1.8	0.18	1.3	3.7 (0.55-25)	1.8	0.18
Antigen processing and presentation	Proteasome	KLHL9	-0.22	0.8 (0.63-1)	3.3	0.069	0.33	1.4 (0.89-2.2)	2.1	0.14	-0.17	0.84 (0.4-1.8)	0.21	0.65	-0.38	0.69 (0.35-1.4)	1.2	0.28	-0.02	0.98 (0.62-1.6)	0.01	0.93	-0.02	0.98 (0.62-1.6)	0.01	0.93
Antigen processing and presentation	Proteasome	LMO7	0.021	1 (0.44-2.3)	0	0.96	0.53	1.7 (0.39-7.4)	0.5	0.48	-1.7	0.19 (0.02-1.8)	2.1	0.15	0.45	1.6 (0.22-11)	0.2	0.66	0.65	1.9 (0.27-14)	0.42	0.52	0.65	1.9 (0.27-14)	0.42	0.52
Antigen processing and presentation	Proteasome	LNPEP	0.96	2.6 (1.5-4.5)	12	0.0007	0.28	1.3 (0.38-4.7)	0.19	0.66	0.24	1.3 (0.34-4.8)	0.12	0.72	1.1	3 (0.8-12)	2.7	0.1	1.1	3.1 (1.2-8.2)	5	0.025	1.1	3.1 (1.2-8.2)	5	0.025
Antigen processing and presentation	Proteasome	LONRF1	0.2	1.2 (0.8-1.9)	0.88	0.35	0.81	2.2 (1.2-4.4)	5.7	0.017	0.37	1.4 (0.57-3.7)	0.61	0.44	0.32	1.4 (0.5-3.8)	0.39	0.53	-0.12	0.89 (0.34-2.4)	0.06	0.81	-0.12	0.89 (0.34-2.4)	0.06	0.81
Antigen processing and presentation	Proteasome	LRRC41	-0.27	0.76 (0.56-1.1)	2.7	0.099	-0.26	0.77 (0.45-1.3)	0.91	0.34	0.022	1 (0.43-2.4)	0	0.96	-0.27	0.76 (0.36-1.6)	0.5	0.48	-1.2	0.3 (0.14-0.65)	9.5	0.0021	-1.2	0.3 (0.14-0.65)	9.5	0.0021
Antigen processing and presentation	Proteasome	MEX3C	0.16	1.2 (0.92-1.5)	1.7	0.2	0.63	1.9 (1.3-2.8)	10	0.0016	0.42	1.5 (0.76-3.1)	1.4	0.23	0.22	1.2 (0.66-2.3)	0.45	0.5	-0.14	0.87 (0.51-1.5)	0.25	0.61	-0.14	0.87 (0.51-1.5)	0.25	0.61
Antigen processing and presentation	Proteasome	MGRN1	0.28	1.3 (0.96-1.8)	3	0.082	-0.13	0.88 (0.47-1.6)	0.16	0.69	0.12	1.1 (0.46-2.8)	0.07	0.79	0.35	1.4 (0.67-3.1)	0.84	0.36	0.48	1.6 (0.84-3.1)	2.1	0.15	0.48	1.6 (0.84-3.1)	2.1	0.15
Antigen processing and presentation	Proteasome	MKRN1	0.22	1.2 (1-1.6)	4	0.045	0.066	1.1 (0.72-1.6)	0.11	0.74	0.53	1.7 (1-2.9)	3.8	0.052	0.012	1 (0.59-1.7)	0	0.97	0.3	1.3 (0.89-2)	2	0.16	0.3	1.3 (0.89-2)	2	0.16
Antigen processing and presentation	Proteasome	MYLIP	-0.12	0.89 (0.69-1.2)	0.77	0.38	-0.37	0.69 (0.39-1.2)	1.6	0.21	0.35	1.4 (0.83-2.4)	1.6	0.2	-0.22	0.81 (0.43-1.5)	0.45	0.5	-0.0013	1 (0.62-1.6)	0	1	-0.0013	1 (0.62-1.6)	0	1
Antigen processing and presentation	Proteasome	NEDD4	0.17	1.2 (0.9-1.6)	1.4	0.23	0.66	1.9 (1.2-3.2)	6.4	0.011	0.38	1.5 (0.76-2.8)	1.3	0.25	0.3	1.4 (0.65-2.8)	0.65	0.42	0.003	1 (0.56-1.8)	0	0.99	0.003	1 (0.56-1.8)	0	0.99
Antigen processing and presentation	Proteasome	NEDD4L	-0.064	0.94 (0.78-1.1)	0.48	0.49	-0.11	0.89 (0.6-1.3)	0.31	0.58	0.21	1.2 (0.81-1.9)	0.98	0.32	-0.35	0.71 (0.46-1.1)	2.6	0.11	0.15	1.2 (0.82-1.6)	0.72	0.4	0.15	1.2 (0.82-1.6)	0.72	0.4
Antigen processing and presentation	Proteasome	NPEPPS	0.14	1.2 (0.95-1.4)	2.1	0.14	0.48	1.6 (1-2.6)	3.8	0.052	-0.017	0.98 (0.62-1.6)	0.01	0.94	0.19	1.2 (0.74-2)	0.59	0.44	0.2	1.2 (0.86-1.7)	1.3	0.26	0.2	1.2 (0.86-1.7)	1.3	0.26
Antigen processing and presentation	Proteasome	PJA1	0.18	1.2 (0.9-1.6)	1.5	0.22	0.062	1.1 (0.63-1.8)	0.05	0.82	0.6	1.8 (0.86-3.9)	2.5	0.12	0.18	1.2 (0.6-2.4)	0.26	0.61	0.0064	1 (0.58-1.8)	0	0.98	0.0064	1 (0.58-1.8)	0	0.98
Antigen processing and presentation	Proteasome	PJA2	-0.14	0.87 (0.72-1)	2.3	0.13	0.26	1.3 (0.85-2)	1.4	0.23	-0.15	0.86 (0.51-1.4)	0.35	0.55	-0.13	0.88 (0.55-1.4)	0.28	0.6	-0.019	0.98 (0.64-1.5)	0.01	0.93	-0.019	0.98 (0.64-1.5)	0.01	0.93
Antigen processing and presentation	Proteasome	PSMA1	-0.17	0.85 (0.61-1.2)	0.94	0.33	-0.39	0.68 (0.38-1.2)	1.7	0.19	-0.19	0.83 (0.35-2)	0.18	0.67	-0.16	0.85 (0.36-2)	0.14	0.71	-0.1	0.9 (0.48-1.7)	0.1	0.76	-0.1	0.9 (0.48-1.7)	0.1	0.76
Antigen processing and presentation	Proteasome	PSMA1	-0.17	0.85 (0.61-1.2)	0.94	0.33	-0.39	0.68 (0.38-1.2)	1.7	0.19	-0.19	0.83 (0.35-2)	0.18	0.67	-0.16	0.85 (0.36-2)	0.14	0.71	-0.1	0.9 (0.48-1.7)	0.1	0.76	-0.1	0.9 (0.48-1.7)	0.1	0.76
Antigen processing and presentation	Proteasome	PSMA2	0.48	1.6 (1.2-2.2)	10	0.0012	0.092	1.1 (0.63-1.9)	0.11	0.74	0.39	1.5 (0.75-3)	1.3	0.26	0.45	1.6 (0.73-3.4)	1.4	0.24	0.13	1.1 (0.62-2.1)	0.18	0.67	0.13	1.1 (0.62-2.1)	0.18	0.67
Antigen processing and presentation	Proteasome	PSMA2	0.48	1.6 (1.2-2.2)	10	0.0012	0.092	1.1 (0.63-1.9)	0.11	0.74	0.39	1.5 (0.75-3)	1.3	0.26	0.45	1.6 (0.73-3.4)	1.4	0.24	0.13	1.1 (0.62-2.1)	0.18	0.67	0.13	1.1 (0.62-2.1)	0.18	0.67
Antigen processing and presentation	Proteasome	PSMA3	0.2	1.2 (0.93-1.6)	2	0.16	-0.1	0.9 (0.53-1.5)	0.15	0.7	0.27	1.3 (0.66-2.6)	0.59	0.44	0.13	1.1 (0.54-2.4)	0.11	0.74	0.11	1.1 (0.62-2)	0.13	0.72	0.11	1.1 (0.62-2)	0.13	0.72
Antigen processing and presentation	Proteasome	PSMA3	0.2	1.2 (0.93-1.6)	2	0.16	-0.1	0.9 (0.53-1.5)	0.15	0.7	0.27	1.3 (0.66-2.6)	0.59	0.44	0.13	1.1 (0.54-2.4)	0.11	0.74	0.11	1.1 (0.62-2)	0.13	0.72	0.11	1.1 (0.62-2)	0.13	0.72
Antigen processing and presentation	Proteasome	PSMA4	0.33	1.4 (1-1.9)	4.4	0.036	0.14	1.2 (0.66-2)	0.24	0.62	0.37	1.5 (0.66-3.2)	0.85	0.36	0.094	1.1 (0.48-2.5)	0.05	0.82	0.13	1.1 (0.6-2.2)	0.16	0.68	0.13	1.1 (0.6-2.2)	0.16	0.68
Antigen processing and presentation	Proteasome	PSMA4	0.33	1.4 (1-1.9)	4.4	0.036	0.14	1.2 (0.66-2)	0.24	0.62	0.37	1.5 (0.66-3.2)	0.85	0.36	0.094	1.1 (0.48-2.5)	0.05	0.82	0.13	1.1 (0.6-2.2)	0.16	0.68	0.13	1.1 (0.6-2.2)	0.16	0.68
Antigen processing and presentation	Proteasome	PSMA5	0.0078	1 (0.74-1.4)	0	0.96	-0.57	0.56 (0.3-1)	3.4	0.067	0.28	1.3 (0.55-3.2)	0.4	0.53	-0.22	0.8 (0.35-1.8)	0.28	0.6	-0.45	0.64 (0.36-1.2)	2.2	0.14	-0.45	0.64 (0.36-1.2)	2.2	0.14
Antigen processing and presentation	Proteasome	PSMA5	0.0078	1 (0.74-1.4)	0	0.96	-0.57	0.56 (0.3-1)	3.4	0.067	0.28	1.3 (0.55-3.2)	0.4	0.53	-0.22	0.8 (0.35-1.8)	0.28	0.6	-0.45	0.64 (0.36-1.2)	2.2	0.14	-0.45	0.64 (0.36-1.2)	2.2	0.14
Antigen processing and presentation	Proteasome	PSMA7	0.28	1.3 (1.1-1.6)	6.8	0.0089	-0.11	0.9 (0.56-1.4)	0.2	0.66	0.11	1.1 (0.64-1.9)	0.15	0.7	0.086	1.1 (0.62-1.9)	0.09	0.77	-0.078	0.93 (0.6-1.4)	0.12	0.73	-0.078	0.93 (0.6-1.4)	0.12	0.73
Antigen processing and presentation	Proteasome	PSMA7	0.28	1.3 (1.1-1.6)	6.8	0.0089	-0.11	0.9 (0.56-1.4)	0.2	0.66	0.11	1.1 (0.64-1.9)	0.15	0.7	0.086	1.1 (0.62-1.9)	0.09	0.77	-0.078	0.93 (0.6-1.4)	0.12	0.73	-0.078	0.93 (0.6-1.4)	0.12	0.73
Antigen processing and presentation	Proteasome	PSMB1	-0.31	0.74 (0.54-1)	3.7	0.053	-0.7	0.5 (0.29-0.84)	6.7	0.0098	0.57	1.8 (0.74-4.3)	1.6	0.2	-0.44	0.64 (0.31-1.3)	1.4	0.23	-0.61	0.54 (0.3-0.98)	4.1	0.042	-0.61	0.54 (0.3-0.98)	4.1	0.042
Antigen processing and presentation	Proteasome	PSMB1	-0.31	0.74 (0.54-1)	3.7	0.053	-0.7	0.5 (0.29-0.84)	6.7	0.0098	0.57	1.8 (0.74-4.3)	1.6	0.2	-0.44	0.64 (0.31-1.3)	1.4	0.23	-0.61	0.54 (0.3-0.98)	4.1	0.042	-0.61	0.54 (0.3-0.98)	4.1	0.042
Antigen processing and presentation	Proteasome	PSMB10	-0.058	0.94 (0.78-1.1)	0.35	0.56	-0.3	0.74 (0.54-1)	3.2	0.076	-0.17	0.85 (0.54-1.3)	0.51	0.48	0.084	1.1 (0.63-1.9)	0.09	0.77	-0.19	0.82 (0.56-1.2)	0.95	0.33	-0.19	0.82 (0.56-1.2)	0.95	0.33
Antigen processing and presentation	Proteasome	PSMB10	-0.058	0.94 (0.78-1.1)	0.35	0.56	-0.3	0.74 (0.54-1)	3.2	0.076	-0.17	0.85 (0.54-1.3)	0.51	0.48	0.084	1.1 (0.63-1.9)	0.09	0.77	-0.19	0.82 (0.56-1.2)	0.95	0.33	-0.19	0.82 (0.56-1.2)	0.95	0.33
Antigen processing and presentation	Proteasome	PSMB2	0.078	1.1 (0.83-1.4)	0.34	0.56	-0.72	0.49 (0.28-0.86)	6.1	0.014	0.062	1.1 (0.41-2.8)	0.02	0.9	-0.75	0.47 (0.21-1.1)	3.1	0.076	0.052	1.1 (0.58-1.9)	0.03	0.86	0.052	1.1 (0.58-1.9)	0.03	0.86
Antigen processing and presentation	Proteasome	PSMB2	0.078	1.1 (0.83-1.4)	0.34	0.56	-0.72	0.49 (0.28-0.86)	6.1	0.014	0.062	1.1 (0.41-2.8)	0.02	0.9	-0.75	0.47 (0.21-1.1)	3.1	0.076	0.052	1.1 (0.58-1.9)	0.03	0.86	0.052	1.1 (0.58-1.9)	0.03	0.86
Antigen processing and presentation	Proteasome	PSMB3	0.23	1.3 (1-1.5)	5.8	0.016	-0.18	0.83 (0.53-1.3)	0.64	0.42	0.1	1.1 (0.78-1.6)	0.34	0.56	-0.038	0.96 (0.49-1.9)	0.01	0.91	0.21	1.2 (0.77-1.9)	0.77	0.38	0.21	1.2 (0.77-1.9)	0.77	0.38
Antigen processing and presentation	Proteasome	PSMB3	0.23	1.3 (1-1.5)	5.8	0.016	-0.18	0.83 (0.53-1.3)	0.64	0.42	0.1	1.1 (0.78-1.6)	0.34	0.56	-0.038	0.96 (0.49-1.9)	0.01	0.91	0.21	1.2 (0.77-1.9)	0.77	0.38	0.21	1.2 (0.77-1.9)	0.77	0.38
Antigen processing and presentation	Proteasome	PSMB4	0.013	1 (0.77-1.3)	0.01	0.93	-0.54	0.58 (0.33-1)	3.6	0.057	-0.048	0.95 (0.45-2)	0.02	0.9	0.077	1.1 (0.52-2.2)	0.04	0.84	0.15	1.2 (0.66-2.1)	0.28	0.6	0.15	1.2 (0.66-2.1)	0.28	0.6
Antigen processing and presentation	Proteasome	PSMB4	0.013	1 (0.77-1.3)	0.01	0.93	-0.54	0.58 (0.33-1)	3.6	0.057	-0.048	0.95 (0.45-2)	0.02	0.9	0.077	1.1 (0.52-2.2)	0.04	0.84	0.15	1.2 (0.66-2.1)	0.28	0.6	0.15	1.2 (0.66-2.1)	0.28	0.6
Antigen processing and presentation	Proteasome	PSMB5	0.46	1.6 (1.2-2.1)	10	0.0016	0.15	1.2 (0.66-2)	0.26	0.61	0.59	1.8 (0.84-3.9)	2.3	0.13	-0.55	0.58 (0.25-1.3)	1.7	0.2	0.28	1.3 (0.75-2.3)	0.93	0.33	0.28	1.3 (0.75-2.3)	0.93	0.33
Antigen processing and presentation	Proteasome	PSMB5	0.46	1.6 (1.2-2.1)	10	0.0016	0.15	1.2 (0.66-2)	0.26	0.61	0.59	1.8 (0.84-3.9)	2.3	0.13	-0.55	0.58 (0.25-1.3)	1.7	0.2	0.28	1.3 (0.75-2.3)	0.93	0.33	0.28	1.3 (0.75-2.3)	0.93	0.33
Antigen processing and presentation	Proteasome	PSMB6	0.27	1.3 (0.95-1.8)	2.8	0.096	-0.2	0.82 (0.41-1.6)	0.33	0.57	0.17	1.2 (0.5-2.8)	0.14	0.7	0.023	1 (0.52-2)	0	0.95	0.36	1.4 (0.79-2.6)	1.4	0.24	0.36	1.4 (0.79-2.6)	1.4	0.24
Antigen processing and presentation	Proteasome	PSMB6	0.27	1.3 (0.95-1.8)	2.8	0.096	-0.2	0.82 (0.41-1.6)	0.33	0.57	0.17	1.2 (0.5-2.8)	0.14	0.7	0.023	1 (0.52-2)	0	0.95	0.36	1.4 (0.79-2.6)	1.4	0.24	0.36	1.4 (0.79-2.6)	1.4	0.24
Antigen processing and presentation	Proteasome	PSMB7	0.49	1.6 (1.2-2.2)	10	0.0014	0.13	1.1 (0.63-2)	0.18	0.67	0.61	1.8 (1-3.3)	4.1	0.044	-0.3	0.74 (0.32-1.7)	0.49	0.49	0.31	1.4 (0.75-2.5)	1	0.31	0.31	1.4 (0.75-2.5)	1	0.31
Antigen processing and presentation	Proteasome	PSMB7	0.49	1.6 (1.2-2.2)	10	0.0014	0.13	1.1 (0.63-2)	0.18	0.67	0.61	1.8 (1-3.3)	4.1	0.044	-0.3	0.74 (0.32-1.7)	0.49	0.49	0.31	1.4 (0.75-2.5)	1	0.31	0.31	1.4 (0.75-2.5)	1	0.31
Antigen processing and presentation	Proteasome	PSMB8	-0.23	0.8 (0.68-0.93)	8.3	0.004	-0.31	0.74 (0.57-0.95)	5.6	0.018	-0.3	0.74 (0.54-1)	3.2	0.073	-0.056	0.95 (0.61-1.5)	0.06	0.81	-0.36	0.7 (0.53-0.92)	6.3	0.012	-0.36	0.7 (0.53-0.92)	6.3	0.012
Antigen processing and presentation	Proteasome	PSMB8	-0.23	0.8 (0.68-0.93)	8.3	0.004	-0.31	0.74 (0.57-0.95)	5.6	0.018	-0.3	0.74 (0.54-1)	3.2	0.073	-0.056	0.95 (0.61-1.5)	0.06	0.81	-0.36	0.7 (0.53-0.92)	6.3	0.012	-0.36	0.7 (0.53-0.92)	6.3	0.012
Antigen processing and presentation	Proteasome	PSMB9	-0.14	0.87 (0.77-0.98)	5	0.026	-0.34	0.71 (0.58-0.88)	10	0.0013	-0.27	0.76 (0.58-1)	3.6	0.056	0.031	1 (0.71-1.5)	0.02	0.87	-0.18	0.83 (0.65-1.1)	2.2	0.14	-0.18	0.83 (0.65-1.1)	2.2	0.14
Antigen processing and presentation	Proteasome	PSMB9	-0.14	0.87 (0.77-0.98)	5	0.026	-0.34	0.71 (0.58-0.88)	10	0.0013	-0.27	0.76 (0.58-1)	3.6	0.056	0.031	1 (0.71-1.5)	0.02	0.87	-0.18	0.83 (0.65-1.1)	2.2	0.14	-0.18	0.83 (0.65-1.1)	2.2	0.14
Antigen processing and presentation	Proteasome	PSMC1	0.29	1.3 (0.89-2)	2	0.16	-0.37	0.69 (0.31-1.6)	0.8	0.37	0.55	1.7 (0.69-4.4)	1.4	0.24	-0.28	0.76 (0.27-2.2)	0.27	0.61	0.72	2.1 (0.9-4.7)	2.9	0.09	0.72	2.1 (0.9-4.7)	2.9	0.09
Antigen processing and presentation	Proteasome	PSMC2	0.068	1.1 (0.8-1.4)	0.21	0.65	0.2	1.2 (0.7-2.1)	0.49	0.49	0.81	2.3 (0.91-5.6)	3.1	0.078	0.24	1.3 (0.62-2.6)	0.42	0.52	-0.46	0.63 (0.34-1.2)	2.2	0.14	-0.46	0.63 (0.34-1.2)	2.2	0.14
Antigen processing and presentation	Proteasome	PSMC3	-0.04	0.96 (0.78-1.2)	0.15	0.7	-0.37	0.69 (0.48-1)	3.9	0.048	-0.42	0.66 (0.37-1.2)	2	0.15	-0.065	0.94 (0.57-1.5)	0.06	0.8	0.077	1.1 (0.73-1.6)	0.15	0.7	0.077	1.1 (0.73-1.6)	0.15	0.7
Antigen processing and presentation	Proteasome	PSMC4	-0.092	0.91 (0.67-1.2)	0.33	0.57	-0.77	0.46 (0.25-0.84)	6.3	0.012	-0.39	0.68 (0.32-1.5)	0.99	0.32	-0.34	0.71 (0.27-1.9)	0.48	0.49	0.18	1.2 (0.62-2.3)	0.29	0.59	0.18	1.2 (0.62-2.3)	0.29	0.59
Antigen processing and presentation	Proteasome	PSMC5	0.17	1.2 (0.91-1.6)	1.6	0.21	-0.5	0.61 (0.33-1.1)	2.6	0.11	0.2	1.2 (0.68-2.2)	0.46	0.5	0.14	1.2 (0.54-2.5)	0.13	0.71	0.16	1.2 (0.72-1.9)	0.4	0.53	0.16	1.2 (0.72-1.9)	0.4	0.53
Antigen processing and presentation	Proteasome	PSMC6	0.37	1.4 (1.1-1.8)	9.2	0.0023	0.3	1.4 (0.88-2.1)	1.9	0.16	0.68	2 (1.2-3.3)	6.4	0.012	0.48	1.6 (0.89-2.9)	2.4	0.12	0.18	1.2 (0.7-2)	0.42	0.52	0.18	1.2 (0.7-2)	0.42	0.52
Antigen processing and presentation	Proteasome	PSMD1	-0.072	0.93 (0.7-1.2)	0.23	0.63	-0.5	0.61 (0.36-1)	3.5	0.061	0.082	1.1 (0.49-2.4)	0.04	0.84	-0.031	0.97 (0.46-2)	0.01	0.93	-0.43	0.65 (0.35-1.2)	1.8	0.17	-0.43	0.65 (0.35-1.2)	1.8	0.17
Antigen processing and presentation	Proteasome	PSMD10	0.29	1.3 (1-1.8)	4	0.045	0.21	1.2 (0.75-2)	0.67	0.41	0.59	1.8 (0.88-3.7)	2.6	0.11	0.14	1.2 (0.53-2.5)	0.13	0.72	-0.31	0.74 (0.39-1.4)	0.88	0.35	-0.31	0.74 (0.39-1.4)	0.88	0.35
Antigen processing and presentation	Proteasome	PSMD11	0.33	1.4 (1.1-1.7)	8.6	0.0035	-0.26	0.77 (0.47-1.3)	1.1	0.3	0.033	1 (0.57-1.9)	0.01	0.91	-0.053	0.95 (0.48-1.9)	0.02	0.88	0.5	1.6 (1-2.7)	4	0.044	0.5	1.6 (1-2.7)	4	0.044
Antigen processing and presentation	Proteasome	PSMD12	0.3	1.3 (1.1-1.6)	11	0.00088	-0.11	0.89 (0.59-1.4)	0.26	0.61	0.39	1.5 (0.96-2.3)	3.2	0.075	0.029	1 (0.54-2)	0.01	0.93	0.093	1.1 (0.75-1.6)	0.23	0.63	0.093	1.1 (0.75-1.6)	0.23	0.63
Antigen processing and presentation	Proteasome	PSMD13	0.3	1.4 (0.99-1.8)	3.7	0.055	-0.13	0.88 (0.48-1.6)	0.18	0.67	0.52	1.7 (0.78-3.6)	1.8	0.19	0.37	1.4 (0.69-3)	0.95	0.33	0.17	1.2 (0.65-2.2)	0.32	0.57	0.17	1.2 (0.65-2.2)	0.32	0.57
Antigen processing and presentation	Proteasome	PSMD14	0.51	1.7 (1.2-2.2)	12	0.00062	0.21	1.2 (0.66-2.3)	0.43	0.51	0.44	1.6 (0.67-3.6)	1	0.31	-0.23	0.8 (0.34-1.8)	0.28	0.59	0.47	1.6 (0.87-2.9)	2.2	0.13	0.47	1.6 (0.87-2.9)	2.2	0.13
Antigen processing and presentation	Proteasome	PSMD2	0.67	2 (1.5-2.6)	19	1.1e-05	0.099	1.1 (0.6-2)	0.1	0.75	0.75	2.1 (1.1-4.2)	4.6	0.031	0.032	1 (0.34-3.1)	0	0.95	0.85	2.3 (1.1-4.9)	5.3	0.022	0.85	2.3 (1.1-4.9)	5.3	0.022
Antigen processing and presentation	Proteasome	PSMD3	0.096	1.1 (0.97-1.2)	2.4	0.12	-0.42	0.66 (0.46-0.93)	5.5	0.019	-0.0077	0.99 (0.8-1.2)	0	0.95	0.05	1.1 (0.62-1.8)	0.03	0.86	0.11	1.1 (0.81-1.5)	0.46	0.5	0.11	1.1 (0.81-1.5)	0.46	0.5
Antigen processing and presentation	Proteasome	PSMD4	0.25	1.3 (0.96-1.7)	2.9	0.09	-0.64	0.53 (0.29-0.96)	4.3	0.037	0.62	1.9 (0.92-3.7)	3	0.084	0.46	1.6 (0.81-3.1)	1.8	0.18	0.77	2.1 (1.2-3.8)	6.6	0.01	0.77	2.1 (1.2-3.8)	6.6	0.01
Antigen processing and presentation	Proteasome	PSMD5	-0.14	0.87 (0.68-1.1)	1.3	0.26	0.26	1.3 (0.78-2.2)	1	0.31	-0.055	0.95 (0.55-1.6)	0.04	0.84	-0.32	0.72 (0.4-1.3)	1.1	0.29	-0.48	0.62 (0.37-1)	3.2	0.073	-0.48	0.62 (0.37-1)	3.2	0.073
Antigen processing and presentation	Proteasome	PSMD6	0.0043	1 (0.73-1.4)	0	0.98	0.15	1.2 (0.63-2.2)	0.23	0.63	-0.054	0.95 (0.47-1.9)	0.02	0.88	-0.3	0.74 (0.36-1.5)	0.64	0.42	0.069	1.1 (0.53-2.1)	0.04	0.85	0.069	1.1 (0.53-2.1)	0.04	0.85
Antigen processing and presentation	Proteasome	PSMD7	0.42	1.5 (1.2-2)	9.8	0.0017	-0.16	0.85 (0.47-1.5)	0.28	0.59	0.78	2.2 (1.1-4.3)	5	0.025	0.36	1.4 (0.72-2.8)	1.1	0.3	-0.28	0.75 (0.43-1.3)	0.96	0.33	-0.28	0.75 (0.43-1.3)	0.96	0.33
Antigen processing and presentation	Proteasome	PSMD8	0.033	1 (0.8-1.3)	0.07	0.8	-0.065	0.94 (0.61-1.5)	0.08	0.77	-0.27	0.76 (0.43-1.4)	0.85	0.36	-0.29	0.75 (0.37-1.5)	0.66	0.42	-0.1	0.9 (0.51-1.6)	0.12	0.73	-0.1	0.9 (0.51-1.6)	0.12	0.73
Antigen processing and presentation	Proteasome	PSMD9	0.21	1.2 (0.88-1.7)	1.5	0.22	0.34	1.4 (0.72-2.7)	0.99	0.32	0.14	1.2 (0.51-2.6)	0.12	0.73	-0.023	0.98 (0.43-2.2)	0	0.96	-0.12	0.89 (0.44-1.8)	0.12	0.73	-0.12	0.89 (0.44-1.8)	0.12	0.73
Antigen processing and presentation	Proteasome	PSME1	-0.22	0.8 (0.59-1.1)	2.1	0.14	-0.7	0.5 (0.3-0.82)	7.3	0.0067	0.035	1 (0.48-2.3)	0.01	0.93	-0.64	0.53 (0.21-1.3)	1.9	0.17	-0.13	0.87 (0.45-1.7)	0.16	0.69	-0.13	0.87 (0.45-1.7)	0.16	0.69
Antigen processing and presentation	Proteasome	PSME3	0.12	1.1 (0.87-1.5)	0.84	0.36	-0.15	0.86 (0.51-1.4)	0.31	0.58	-0.66	0.52 (0.24-1.1)	2.9	0.089	-0.051	0.95 (0.48-1.9)	0.02	0.88	0.46	1.6 (0.91-2.7)	2.7	0.1	0.46	1.6 (0.91-2.7)	2.7	0.1
Antigen processing and presentation	Proteasome	PSME4	0.1	1.1 (0.91-1.3)	1.1	0.3	-0.19	0.83 (0.54-1.3)	0.8	0.37	0.1	1.1 (0.61-2)	0.11	0.73	0.18	1.2 (0.65-2.2)	0.34	0.56	0.053	1.1 (0.64-1.7)	0.04	0.84	0.053	1.1 (0.64-1.7)	0.04	0.84
Antigen processing and presentation	Proteasome	PSMF1	0.07	1.1 (0.85-1.3)	0.36	0.55	0.24	1.3 (0.8-2)	1	0.31	0.095	1.1 (0.62-2)	0.1	0.75	0.069	1.1 (0.6-1.9)	0.05	0.82	0.044	1 (0.62-1.8)	0.03	0.87	0.044	1 (0.62-1.8)	0.03	0.87
Antigen processing and presentation	Proteasome	RBBP6	0.067	1.1 (0.82-1.4)	0.25	0.62	0.28	1.3 (0.78-2.2)	1.1	0.29	0.2	1.2 (0.61-2.4)	0.32	0.57	0.12	1.1 (0.63-2)	0.16	0.69	-0.0099	0.99 (0.59-1.7)	0	0.97	-0.0099	0.99 (0.59-1.7)	0	0.97
Antigen processing and presentation	Proteasome	RBCK1	0.09	1.1 (0.87-1.4)	0.62	0.43	-0.33	0.72 (0.47-1.1)	2.2	0.14	-0.068	0.93 (0.54-1.6)	0.06	0.81	0.14	1.1 (0.63-2.1)	0.2	0.65	-0.19	0.83 (0.52-1.3)	0.6	0.44	-0.19	0.83 (0.52-1.3)	0.6	0.44
Antigen processing and presentation	Proteasome	RBX1	-0.032	0.97 (0.72-1.3)	0.05	0.83	0.092	1.1 (0.59-2)	0.09	0.77	0.35	1.4 (0.63-3.2)	0.71	0.4	-0.34	0.71 (0.38-1.4)	1	0.3	-0.35	0.71 (0.4-1.3)	1.4	0.24	-0.35	0.71 (0.4-1.3)	1.4	0.24
Antigen processing and presentation	Proteasome	RCHY1	-0.15	0.86 (0.71-1.1)	2	0.15	0.16	1.2 (0.78-1.8)	0.58	0.45	0.12	1.1 (0.7-1.8)	0.24	0.63	-0.28	0.75 (0.46-1.2)	1.3	0.25	-0.38	0.69 (0.45-1)	3.1	0.077	-0.38	0.69 (0.45-1)	3.1	0.077
Antigen processing and presentation	Proteasome	RNF111	0.12	1.1 (0.86-1.5)	0.76	0.38	0.58	1.8 (1.1-2.8)	5.9	0.015	0.38	1.5 (0.72-3)	1.1	0.3	0.064	1.1 (0.53-2.1)	0.03	0.86	0.35	1.4 (0.77-2.6)	1.2	0.26	0.35	1.4 (0.77-2.6)	1.2	0.26
Antigen processing and presentation	Proteasome	RNF114	0.0089	1 (0.81-1.3)	0.01	0.94	-0.53	0.59 (0.37-0.95)	4.7	0.03	-0.066	0.94 (0.54-1.6)	0.06	0.81	0.32	1.4 (0.73-2.6)	0.98	0.32	-0.25	0.78 (0.5-1.2)	1.2	0.28	-0.25	0.78 (0.5-1.2)	1.2	0.28
Antigen processing and presentation	Proteasome	RNF115	-0.041	0.96 (0.73-1.3)	0.08	0.77	0.038	1 (0.63-1.7)	0.02	0.88	0.2	1.2 (0.6-2.5)	0.3	0.58	-0.25	0.78 (0.41-1.5)	0.61	0.43	0.12	1.1 (0.6-2.1)	0.13	0.72	0.12	1.1 (0.6-2.1)	0.13	0.72
Antigen processing and presentation	Proteasome	RNF123	-0.16	0.85 (0.55-1.3)	0.52	0.47	-0.97	0.38 (0.13-1.1)	3.1	0.078	-1	0.36 (0.099-1.3)	2.5	0.11	-0.2	0.82 (0.31-2.1)	0.17	0.68	0.015	1 (0.47-2.2)	0	0.97	0.015	1 (0.47-2.2)	0	0.97
Antigen processing and presentation	Proteasome	RNF126	-0.073	0.93 (0.67-1.3)	0.19	0.66	0.24	1.3 (0.62-2.6)	0.43	0.51	-0.13	0.88 (0.4-1.9)	0.11	0.74	-0.13	0.88 (0.43-1.8)	0.12	0.72	-0.7	0.5 (0.26-0.95)	4.4	0.036	-0.7	0.5 (0.26-0.95)	4.4	0.036
Antigen processing and presentation	Proteasome	RNF130	-0.21	0.81 (0.59-1.1)	1.7	0.19	0.0056	1 (0.57-1.8)	0	0.98	-0.0058	0.99 (0.43-2.3)	0	0.99	-0.17	0.85 (0.39-1.8)	0.18	0.67	-0.51	0.6 (0.32-1.1)	2.5	0.12	-0.51	0.6 (0.32-1.1)	2.5	0.12
Antigen processing and presentation	Proteasome	RNF138	0.075	1.1 (0.87-1.3)	0.46	0.5	0.2	1.2 (0.83-1.8)	1	0.31	0.28	1.3 (0.77-2.3)	1	0.31	0.21	1.2 (0.68-2.2)	0.48	0.49	-0.24	0.79 (0.48-1.3)	0.93	0.33	-0.24	0.79 (0.48-1.3)	0.93	0.33
Antigen processing and presentation	Proteasome	RNF14	-0.08	0.92 (0.76-1.1)	0.64	0.42	-0.12	0.88 (0.56-1.4)	0.27	0.6	0.015	1 (0.62-1.7)	0	0.95	-0.13	0.88 (0.56-1.4)	0.34	0.56	-0.14	0.87 (0.59-1.3)	0.47	0.5	-0.14	0.87 (0.59-1.3)	0.47	0.5
Antigen processing and presentation	Proteasome	RNF19A	-0.39	0.68 (0.52-0.89)	7.9	0.005	-0.66	0.52 (0.31-0.87)	6.1	0.013	-0.99	0.37 (0.18-0.77)	7.2	0.0074	-0.42	0.65 (0.33-1.3)	1.5	0.22	-0.29	0.75 (0.44-1.3)	1.2	0.28	-0.29	0.75 (0.44-1.3)	1.2	0.28
Antigen processing and presentation	Proteasome	RNF19B	-0.17	0.85 (0.68-1)	2.4	0.12	-0.28	0.75 (0.51-1.1)	2.1	0.15	-0.13	0.87 (0.52-1.5)	0.26	0.61	-0.33	0.72 (0.42-1.2)	1.4	0.24	-0.28	0.75 (0.43-1.3)	0.99	0.32	-0.28	0.75 (0.43-1.3)	0.99	0.32
Antigen processing and presentation	Proteasome	RNF220	-0.42	0.66 (0.43-1)	3.7	0.053	0.25	1.3 (0.59-2.8)	0.39	0.53	-0.5	0.61 (0.22-1.7)	0.9	0.34	-0.89	0.41 (0.15-1.1)	3.1	0.078	-0.61	0.55 (0.21-1.4)	1.6	0.2	-0.61	0.55 (0.21-1.4)	1.6	0.2
Antigen processing and presentation	Proteasome	RNF25	-0.45	0.64 (0.36-1.1)	2.4	0.12	-1.2	0.3 (0.086-1)	3.7	0.055	0.54	1.7 (0.49-6)	0.72	0.4	-0.84	0.43 (0.12-1.6)	1.6	0.21	-1	0.36 (0.11-1.2)	3	0.086	-1	0.36 (0.11-1.2)	3	0.086
Antigen processing and presentation	Proteasome	RNF34	0.42	1.5 (1.1-2.2)	5.5	0.019	-0.11	0.9 (0.44-1.8)	0.1	0.76	0.44	1.6 (0.71-3.4)	1.2	0.27	0.62	1.9 (0.8-4.4)	2.1	0.15	0.32	1.4 (0.68-2.8)	0.8	0.37	0.32	1.4 (0.68-2.8)	0.8	0.37
Antigen processing and presentation	Proteasome	RNF4	0.092	1.1 (0.78-1.5)	0.27	0.6	-0.5	0.6 (0.32-1.1)	2.5	0.11	0.067	1.1 (0.48-2.4)	0.03	0.87	0.63	1.9 (0.73-4.8)	1.7	0.19	0.025	1 (0.55-1.9)	0.01	0.94	0.025	1 (0.55-1.9)	0.01	0.94
Antigen processing and presentation	Proteasome	RNF41	0.13	1.1 (0.83-1.6)	0.65	0.42	0.23	1.3 (0.62-2.6)	0.4	0.53	-0.3	0.74 (0.3-1.8)	0.45	0.5	0.054	1.1 (0.44-2.5)	0.01	0.9	-0.36	0.7 (0.35-1.4)	1.1	0.3	-0.36	0.7 (0.35-1.4)	1.1	0.3
Antigen processing and presentation	Proteasome	RNF6	0.18	1.2 (0.97-1.5)	2.8	0.092	0.044	1 (0.69-1.6)	0.04	0.84	0.44	1.6 (0.94-2.6)	3	0.086	0.14	1.1 (0.72-1.8)	0.32	0.57	0.36	1.4 (0.9-2.3)	2.3	0.13	0.36	1.4 (0.9-2.3)	2.3	0.13
Antigen processing and presentation	Proteasome	RNF7	0.25	1.3 (0.96-1.7)	2.8	0.094	0.54	1.7 (1-2.8)	4.4	0.035	0.69	2 (1-3.9)	4	0.046	-0.18	0.84 (0.39-1.8)	0.21	0.65	0.04	1 (0.56-1.9)	0.02	0.9	0.04	1 (0.56-1.9)	0.02	0.9
Antigen processing and presentation	Proteasome	RPS27A	-0.21	0.81 (0.5-1.3)	0.73	0.39	1.1	3.1 (1-9)	4.1	0.043	0.67	2 (0.55-7)	1.1	0.3	0.2	1.2 (0.39-3.8)	0.11	0.73	-0.98	0.37 (0.15-0.91)	4.8	0.029	-0.98	0.37 (0.15-0.91)	4.8	0.029
Antigen processing and presentation	Proteasome	SEM1	0.47	1.6 (1.2-2.2)	9.3	0.0023	0.61	1.8 (1.1-3.2)	4.6	0.033	-0.028	0.97 (0.4-2.4)	0	0.95	0.55	1.7 (0.79-3.8)	1.9	0.17	0.0063	1 (0.5-2)	0	0.99	0.0063	1 (0.5-2)	0	0.99
Antigen processing and presentation	Proteasome	SIAH1	0.28	1.3 (0.98-1.8)	3.3	0.069	0.7	2 (1-4)	4	0.044	0.14	1.1 (0.58-2.3)	0.16	0.69	0.51	1.7 (0.82-3.4)	2	0.16	0.18	1.2 (0.65-2.2)	0.32	0.57	0.18	1.2 (0.65-2.2)	0.32	0.57
Antigen processing and presentation	Proteasome	SIAH2	-0.095	0.91 (0.79-1.1)	1.7	0.2	-0.034	0.97 (0.59-1.6)	0.02	0.89	0.16	1.2 (0.76-1.8)	0.54	0.46	-0.32	0.73 (0.51-1)	3.1	0.079	0.051	1.1 (0.8-1.4)	0.13	0.72	0.051	1.1 (0.8-1.4)	0.13	0.72
Antigen processing and presentation	Proteasome	SKP1	-0.022	0.98 (0.79-1.2)	0.04	0.84	0.3	1.3 (0.71-2.6)	0.82	0.36	-0.0086	0.99 (0.53-1.9)	0	0.98	-0.13	0.88 (0.44-1.7)	0.14	0.71	0.2	1.2 (0.71-2.1)	0.54	0.46	0.2	1.2 (0.71-2.1)	0.54	0.46
Antigen processing and presentation	Proteasome	SKP2	0.29	1.3 (1.1-1.6)	14	0.00023	0.31	1.4 (0.97-1.9)	3.2	0.075	-0.019	0.98 (0.61-1.6)	0.01	0.94	0.39	1.5 (0.79-2.7)	1.5	0.22	0.38	1.5 (0.94-2.3)	2.8	0.093	0.38	1.5 (0.94-2.3)	2.8	0.093
Antigen processing and presentation	Proteasome	SMURF1	-0.091	0.91 (0.66-1.3)	0.3	0.58	0.29	1.3 (0.77-2.3)	1	0.31	-0.093	0.91 (0.44-1.9)	0.06	0.8	-0.26	0.77 (0.35-1.7)	0.41	0.52	-0.17	0.84 (0.42-1.7)	0.24	0.62	-0.17	0.84 (0.42-1.7)	0.24	0.62
Antigen processing and presentation	Proteasome	SMURF2	0.32	1.4 (1.1-1.7)	10	0.0012	0.28	1.3 (0.86-2)	1.6	0.2	0.28	1.3 (0.83-2.1)	1.4	0.24	0.6	1.8 (1-3.3)	3.9	0.048	0.23	1.3 (0.84-1.9)	1.2	0.26	0.23	1.3 (0.84-1.9)	1.2	0.26
Antigen processing and presentation	Proteasome	SOCS1	-0.44	0.65 (0.46-0.91)	6.2	0.013	-1.3	0.28 (0.14-0.54)	14	0.00018	-0.98	0.37 (0.14-0.98)	4	0.045	0.25	1.3 (0.48-3.5)	0.24	0.62	-0.64	0.53 (0.21-1.3)	1.9	0.17	-0.64	0.53 (0.21-1.3)	1.9	0.17
Antigen processing and presentation	Proteasome	SOCS3	-0.54	0.58 (0.41-0.83)	9.3	0.0023	0.17	1.2 (0.55-2.5)	0.18	0.67	-1.4	0.25 (0.082-0.78)	5.8	0.016	-0.96	0.38 (0.17-0.89)	4.9	0.026	-0.98	0.38 (0.16-0.91)	4.7	0.03	-0.98	0.38 (0.16-0.91)	4.7	0.03
Antigen processing and presentation	Proteasome	SPSB1	0.2	1.2 (0.89-1.7)	1.6	0.21	0.55	1.7 (0.96-3.1)	3.3	0.07	0.2	1.2 (0.52-2.9)	0.21	0.65	-0.069	0.93 (0.44-2)	0.03	0.86	0.45	1.6 (0.66-3.7)	1	0.31	0.45	1.6 (0.66-3.7)	1	0.31
Antigen processing and presentation	Proteasome	STUB1	0.27	1.3 (0.94-1.8)	2.6	0.11	0.13	1.1 (0.57-2.3)	0.14	0.71	1.6	4.9 (1.9-12)	11	0.00073	-0.5	0.6 (0.28-1.3)	1.6	0.21	0.24	1.3 (0.69-2.4)	0.58	0.44	0.24	1.3 (0.69-2.4)	0.58	0.44
Antigen processing and presentation	Proteasome	TPP2	-0.093	0.91 (0.72-1.2)	0.58	0.44	0.13	1.1 (0.76-1.7)	0.41	0.52	0.091	1.1 (0.6-2)	0.09	0.77	0.11	1.1 (0.64-2)	0.14	0.71	-0.081	0.92 (0.57-1.5)	0.11	0.74	-0.081	0.92 (0.57-1.5)	0.11	0.74
Antigen processing and presentation	Proteasome	TRAIP	0.9	2.5 (1.5-4)	12	0.00042	0.18	1.2 (0.42-3.4)	0.11	0.74	-0.75	0.47 (0.16-1.4)	1.8	0.18	0.99	2.7 (0.71-10)	2.1	0.15	1.3	3.8 (1.2-12)	5.4	0.02	1.3	3.8 (1.2-12)	5.4	0.02
Antigen processing and presentation	Proteasome	TRIM21	-0.16	0.85 (0.59-1.2)	0.71	0.4	-0.85	0.43 (0.21-0.86)	5.6	0.018	-0.18	0.84 (0.34-2)	0.15	0.7	0.6	1.8 (0.68-4.9)	1.4	0.23	-0.27	0.76 (0.39-1.5)	0.64	0.42	-0.27	0.76 (0.39-1.5)	0.64	0.42
Antigen processing and presentation	Proteasome	TRIM32	0.25	1.3 (0.92-1.8)	2.1	0.14	0.73	2.1 (1.1-3.7)	5.8	0.016	0.43	1.5 (0.79-3)	1.6	0.21	0.01	1 (0.41-2.5)	0	0.98	-0.23	0.8 (0.39-1.6)	0.38	0.54	-0.23	0.8 (0.39-1.6)	0.38	0.54
Antigen processing and presentation	Proteasome	TRIM36	0.2	1.2 (1-1.4)	5.2	0.023	-0.2	0.82 (0.36-1.9)	0.22	0.64	0.12	1.1 (0.74-1.7)	0.29	0.59	-0.14	0.87 (0.53-1.4)	0.34	0.56	0.23	1.3 (1-1.6)	3.9	0.048	0.23	1.3 (1-1.6)	3.9	0.048
Antigen processing and presentation	Proteasome	TRIM37	0.26	1.3 (1.1-1.6)	6.1	0.014	0.18	1.2 (0.76-1.9)	0.59	0.44	0.12	1.1 (0.76-1.7)	0.37	0.54	0.22	1.3 (0.7-2.2)	0.58	0.45	-0.12	0.89 (0.55-1.4)	0.24	0.63	-0.12	0.89 (0.55-1.4)	0.24	0.63
Antigen processing and presentation	Proteasome	TRIM9	0.0071	1 (0.76-1.3)	0	0.96	-0.018	0.98 (0.53-1.8)	0	0.95	0.75	2.1 (0.31-14)	0.58	0.44	0.035	1 (0.54-2)	0.01	0.92	0.18	1.2 (0.85-1.7)	1	0.3	0.18	1.2 (0.85-1.7)	1	0.3
Antigen processing and presentation	Proteasome	TRIP12	-0.44	0.65 (0.45-0.93)	5.5	0.019	-0.75	0.47 (0.27-0.84)	6.5	0.011	-0.12	0.89 (0.39-2)	0.08	0.78	-0.21	0.81 (0.31-2.2)	0.17	0.68	-0.2	0.82 (0.37-1.8)	0.24	0.63	-0.2	0.82 (0.37-1.8)	0.24	0.63
Antigen processing and presentation	Proteasome	UBA1	0.094	1.1 (0.82-1.5)	0.39	0.53	-0.28	0.76 (0.49-1.2)	1.6	0.21	0.39	1.5 (0.66-3.3)	0.9	0.34	-0.17	0.84 (0.4-1.8)	0.21	0.65	0.35	1.4 (0.74-2.7)	1.1	0.29	0.35	1.4 (0.74-2.7)	1.1	0.29
Antigen processing and presentation	Proteasome	UBA3	0.11	1.1 (0.86-1.4)	0.65	0.42	0.52	1.7 (0.96-3)	3.3	0.069	0.15	1.2 (0.66-2)	0.26	0.61	0.37	1.4 (0.8-2.6)	1.5	0.23	-0.033	0.97 (0.56-1.7)	0.01	0.91	-0.033	0.97 (0.56-1.7)	0.01	0.91
Antigen processing and presentation	Proteasome	UBA5	0.3	1.4 (0.98-1.9)	3.4	0.066	0.73	2.1 (1.1-4)	4.8	0.028	0.62	1.9 (0.87-3.9)	2.6	0.11	0.068	1.1 (0.51-2.3)	0.03	0.86	0.28	1.3 (0.67-2.6)	0.63	0.43	0.28	1.3 (0.67-2.6)	0.63	0.43
Antigen processing and presentation	Proteasome	UBA52	-0.2	0.82 (0.47-1.4)	0.48	0.49	0.28	1.3 (0.44-4)	0.24	0.63	0.53	1.7 (0.46-6.3)	0.62	0.43	-0.17	0.84 (0.24-2.9)	0.07	0.79	-0.67	0.51 (0.18-1.5)	1.6	0.21	-0.67	0.51 (0.18-1.5)	1.6	0.21
Antigen processing and presentation	Proteasome	UBA6	-0.08	0.92 (0.74-1.1)	0.53	0.47	0.074	1.1 (0.74-1.6)	0.15	0.7	-0.4	0.67 (0.41-1.1)	2.5	0.11	-0.49	0.61 (0.32-1.2)	2.2	0.14	-0.23	0.79 (0.52-1.2)	1.2	0.28	-0.23	0.79 (0.52-1.2)	1.2	0.28
Antigen processing and presentation	Proteasome	UBB	1	2.8 (1.5-5.4)	10	0.0014	-0.64	0.53 (0.26-1.1)	3.1	0.077	1.4	4.2 (0.79-23)	2.8	0.092	1.4	4.1 (0.94-18)	3.5	0.061	1.7	5.4 (1.7-17)	8.2	0.0043	1.7	5.4 (1.7-17)	8.2	0.0043
Antigen processing and presentation	Proteasome	UBC	-0.33	0.72 (0.45-1.1)	2	0.15	-0.54	0.58 (0.23-1.5)	1.2	0.26	-0.54	0.58 (0.22-1.5)	1.2	0.28	-0.03	0.97 (0.35-2.7)	0	0.95	-0.91	0.4 (0.16-1)	3.8	0.051	-0.91	0.4 (0.16-1)	3.8	0.051
Antigen processing and presentation	Proteasome	UBE2A	0.23	1.3 (0.95-1.7)	2.5	0.12	-0.29	0.75 (0.44-1.3)	1.1	0.3	0.53	1.7 (0.73-4)	1.5	0.22	-0.15	0.86 (0.39-1.9)	0.13	0.71	-0.21	0.81 (0.43-1.5)	0.42	0.52	-0.21	0.81 (0.43-1.5)	0.42	0.52
Antigen processing and presentation	Proteasome	UBE2B	-0.12	0.89 (0.69-1.1)	0.91	0.34	0.056	1.1 (0.56-2)	0.03	0.86	0.14	1.1 (0.58-2.3)	0.15	0.7	-0.1	0.9 (0.49-1.6)	0.12	0.73	-0.23	0.79 (0.47-1.3)	0.75	0.39	-0.23	0.79 (0.47-1.3)	0.75	0.39
Antigen processing and presentation	Proteasome	UBE2C	0.29	1.3 (1.2-1.5)	20	8.3e-06	-0.21	0.81 (0.55-1.2)	1.1	0.29	-0.11	0.89 (0.55-1.5)	0.2	0.65	0.29	1.3 (0.78-2.3)	1.1	0.3	0.47	1.6 (1.1-2.4)	5.2	0.022	0.47	1.6 (1.1-2.4)	5.2	0.022
Antigen processing and presentation	Proteasome	UBE2D1	0.18	1.2 (0.86-1.7)	1.1	0.29	0.14	1.2 (0.59-2.3)	0.17	0.68	0.002	1 (0.39-2.6)	0	1	0.53	1.7 (0.79-3.7)	1.8	0.18	-0.5	0.61 (0.31-1.2)	2	0.15	-0.5	0.61 (0.31-1.2)	2	0.15
Antigen processing and presentation	Proteasome	UBE2D2	0.35	1.4 (1-2)	4.7	0.031	0.071	1.1 (0.59-1.9)	0.05	0.82	0.39	1.5 (0.67-3.3)	0.93	0.33	0.52	1.7 (0.76-3.7)	1.7	0.2	0.12	1.1 (0.64-2)	0.18	0.67	0.12	1.1 (0.64-2)	0.18	0.67
Antigen processing and presentation	Proteasome	UBE2D3	-0.3	0.74 (0.58-0.94)	6	0.014	-0.23	0.79 (0.51-1.2)	1.1	0.3	-0.44	0.65 (0.35-1.2)	1.9	0.17	-0.42	0.65 (0.35-1.2)	1.8	0.19	-0.45	0.64 (0.41-0.99)	4	0.045	-0.45	0.64 (0.41-0.99)	4	0.045
Antigen processing and presentation	Proteasome	UBE2E1	0.37	1.4 (1.1-1.9)	6.1	0.014	0.96	2.6 (1.5-4.7)	11	0.0011	0.57	1.8 (0.87-3.6)	2.4	0.12	0.0076	1 (0.51-2)	0	0.98	0.28	1.3 (0.69-2.5)	0.72	0.4	0.28	1.3 (0.69-2.5)	0.72	0.4
Antigen processing and presentation	Proteasome	UBE2E3	-0.12	0.89 (0.78-1)	2.9	0.087	0.19	1.2 (0.78-1.9)	0.72	0.4	0.13	1.1 (0.76-1.7)	0.39	0.53	0.0095	1 (0.74-1.4)	0	0.95	-0.35	0.71 (0.54-0.92)	6.5	0.011	-0.35	0.71 (0.54-0.92)	6.5	0.011
Antigen processing and presentation	Proteasome	UBE2G1	0.024	1 (0.85-1.2)	0.06	0.81	-0.013	0.99 (0.68-1.4)	0	0.94	0.11	1.1 (0.69-1.8)	0.21	0.64	-0.081	0.92 (0.62-1.4)	0.16	0.69	-0.091	0.91 (0.6-1.4)	0.19	0.67	-0.091	0.91 (0.6-1.4)	0.19	0.67
Antigen processing and presentation	Proteasome	UBE2G2	-0.1	0.9 (0.69-1.2)	0.54	0.46	-0.17	0.85 (0.51-1.4)	0.42	0.52	-0.17	0.84 (0.45-1.6)	0.3	0.59	0.21	1.2 (0.63-2.4)	0.39	0.53	-0.11	0.9 (0.55-1.5)	0.19	0.66	-0.11	0.9 (0.55-1.5)	0.19	0.66
Antigen processing and presentation	Proteasome	UBE2H	-0.24	0.79 (0.58-1.1)	2.4	0.12	-0.2	0.82 (0.44-1.5)	0.38	0.54	-0.23	0.8 (0.38-1.7)	0.36	0.55	-0.15	0.86 (0.44-1.7)	0.18	0.68	-0.72	0.49 (0.26-0.91)	5	0.025	-0.72	0.49 (0.26-0.91)	5	0.025
Antigen processing and presentation	Proteasome	UBE2J1	-0.42	0.66 (0.54-0.8)	17	4.6e-05	-0.38	0.68 (0.47-1)	3.8	0.05	-0.56	0.57 (0.33-1)	3.8	0.051	-0.072	0.93 (0.54-1.6)	0.07	0.79	-0.97	0.38 (0.24-0.61)	16	5.6e-05	-0.97	0.38 (0.24-0.61)	16	5.6e-05
Antigen processing and presentation	Proteasome	UBE2K	-0.0034	1 (0.8-1.2)	0	0.98	-0.19	0.83 (0.48-1.4)	0.49	0.48	0.031	1 (0.6-1.8)	0.01	0.91	0.16	1.2 (0.67-2.1)	0.31	0.58	0.029	1 (0.63-1.7)	0.01	0.91	0.029	1 (0.63-1.7)	0.01	0.91
Antigen processing and presentation	Proteasome	UBE2L3	0.12	1.1 (0.85-1.5)	0.67	0.41	-0.14	0.87 (0.48-1.6)	0.21	0.65	0.25	1.3 (0.58-2.8)	0.39	0.53	0.043	1 (0.49-2.2)	0.01	0.91	-0.25	0.78 (0.45-1.3)	0.84	0.36	-0.25	0.78 (0.45-1.3)	0.84	0.36
Antigen processing and presentation	Proteasome	UBE2L6	-0.11	0.9 (0.75-1.1)	1.4	0.24	-0.37	0.69 (0.5-0.95)	5.2	0.023	-0.25	0.78 (0.55-1.1)	2	0.16	0.19	1.2 (0.72-2.1)	0.52	0.47	-0.11	0.89 (0.64-1.2)	0.46	0.5	-0.11	0.89 (0.64-1.2)	0.46	0.5
Antigen processing and presentation	Proteasome	UBE2M	-0.035	0.97 (0.8-1.2)	0.14	0.71	-0.42	0.66 (0.44-0.97)	4.4	0.037	-0.24	0.79 (0.48-1.3)	0.88	0.35	-0.088	0.92 (0.6-1.4)	0.17	0.68	-0.067	0.93 (0.64-1.4)	0.12	0.73	-0.067	0.93 (0.64-1.4)	0.12	0.73
Antigen processing and presentation	Proteasome	UBE2N	-0.072	0.93 (0.73-1.2)	0.34	0.56	-0.43	0.65 (0.39-1.1)	2.8	0.095	-0.39	0.68 (0.36-1.3)	1.5	0.22	-0.35	0.71 (0.36-1.4)	1	0.31	-0.28	0.76 (0.46-1.2)	1.2	0.28	-0.28	0.76 (0.46-1.2)	1.2	0.28
Antigen processing and presentation	Proteasome	UBE2O	0.063	1.1 (0.74-1.5)	0.12	0.73	-0.51	0.6 (0.3-1.2)	2.2	0.14	-0.43	0.65 (0.29-1.5)	1.1	0.3	-0.58	0.56 (0.19-1.6)	1.1	0.29	0.6	1.8 (0.89-3.7)	2.7	0.1	0.6	1.8 (0.89-3.7)	2.7	0.1
Antigen processing and presentation	Proteasome	UBE2Q1	0.27	1.3 (0.96-1.8)	3	0.084	-0.28	0.75 (0.39-1.5)	0.72	0.4	0.57	1.8 (0.84-3.7)	2.2	0.13	0.4	1.5 (0.71-3.2)	1.1	0.3	0.37	1.5 (0.74-2.9)	1.2	0.28	0.37	1.5 (0.74-2.9)	1.2	0.28
Antigen processing and presentation	Proteasome	UBE2S	0.27	1.3 (1.1-1.5)	16	7.4e-05	-0.031	0.97 (0.71-1.3)	0.04	0.85	0.022	1 (0.68-1.5)	0.01	0.91	0.056	1.1 (0.69-1.6)	0.07	0.8	0.3	1.4 (0.93-2)	2.5	0.11	0.3	1.4 (0.93-2)	2.5	0.11
Antigen processing and presentation	Proteasome	UBE2V2	0.38	1.5 (1.2-1.8)	14	0.00019	0.2	1.2 (0.83-1.8)	1.1	0.3	0.1	1.1 (0.63-1.9)	0.12	0.72	0.2	1.2 (0.72-2.1)	0.56	0.45	0.31	1.4 (0.9-2.1)	2.1	0.14	0.31	1.4 (0.9-2.1)	2.1	0.14
Antigen processing and presentation	Proteasome	UBE2W	0.27	1.3 (1-1.7)	4.8	0.029	-0.02	0.98 (0.55-1.7)	0	0.95	0.091	1.1 (0.57-2.1)	0.08	0.78	0.42	1.5 (0.81-2.8)	1.7	0.19	0.13	1.1 (0.74-1.7)	0.35	0.56	0.13	1.1 (0.74-1.7)	0.35	0.56
Antigen processing and presentation	Proteasome	UBE2Z	-0.026	0.97 (0.71-1.3)	0.03	0.87	-0.31	0.73 (0.36-1.5)	0.72	0.4	-0.046	0.95 (0.56-1.6)	0.03	0.86	-0.71	0.49 (0.2-1.2)	2.3	0.13	0.22	1.2 (0.62-2.5)	0.38	0.54	0.22	1.2 (0.62-2.5)	0.38	0.54
Antigen processing and presentation	Proteasome	UBE3A	0.07	1.1 (0.88-1.3)	0.47	0.49	0.51	1.7 (1-2.7)	4.6	0.033	0.29	1.3 (0.78-2.3)	1.1	0.29	0.38	1.5 (0.85-2.5)	1.9	0.17	-0.043	0.96 (0.61-1.5)	0.04	0.85	-0.043	0.96 (0.61-1.5)	0.04	0.85
Antigen processing and presentation	Proteasome	UBE3B	0.22	1.2 (0.99-1.6)	3.7	0.055	0.057	1.1 (0.65-1.7)	0.05	0.82	-0.15	0.86 (0.47-1.6)	0.22	0.64	-0.21	0.81 (0.45-1.4)	0.54	0.46	0.39	1.5 (1-2.1)	4.5	0.034	0.39	1.5 (1-2.1)	4.5	0.034
Antigen processing and presentation	Proteasome	UBE3C	0.28	1.3 (1-1.7)	4.7	0.031	0.01	1 (0.65-1.6)	0	0.96	0.48	1.6 (0.85-3.1)	2.2	0.14	0.14	1.2 (0.58-2.3)	0.16	0.69	0.29	1.3 (0.81-2.2)	1.3	0.26	0.29	1.3 (0.81-2.2)	1.3	0.26
Antigen processing and presentation	Proteasome	UBE4A	0.029	1 (0.78-1.4)	0.04	0.84	0.14	1.2 (0.7-1.9)	0.31	0.58	0.31	1.4 (0.69-2.7)	0.78	0.38	0.34	1.4 (0.69-2.8)	0.88	0.35	0.037	1 (0.6-1.8)	0.02	0.9	0.037	1 (0.6-1.8)	0.02	0.9
Antigen processing and presentation	Proteasome	UBR2	-0.071	0.93 (0.67-1.3)	0.17	0.68	-0.33	0.72 (0.41-1.3)	1.3	0.26	0.17	1.2 (0.46-3.1)	0.13	0.72	-0.26	0.77 (0.34-1.8)	0.37	0.54	0.15	1.2 (0.55-2.4)	0.15	0.7	0.15	1.2 (0.55-2.4)	0.15	0.7
Antigen processing and presentation	Proteasome	UBR4	0.071	1.1 (0.79-1.5)	0.21	0.65	0.15	1.2 (0.63-2.1)	0.23	0.63	0.54	1.7 (0.79-3.7)	1.8	0.18	-0.46	0.63 (0.3-1.3)	1.4	0.23	0.54	1.7 (0.95-3.1)	3.2	0.072	0.54	1.7 (0.95-3.1)	3.2	0.072
Antigen processing and presentation	Proteasome	UFL1	0.22	1.2 (1-1.5)	3.8	0.051	0.44	1.6 (0.98-2.5)	3.5	0.06	0.42	1.5 (0.91-2.5)	2.6	0.11	0.38	1.5 (0.88-2.4)	2.2	0.14	0.0032	1 (0.67-1.5)	0	0.99	0.0032	1 (0.67-1.5)	0	0.99
Antigen processing and presentation	Proteasome	UNKL	0.46	1.6 (0.96-2.6)	3.2	0.071	0.2	1.2 (0.4-3.8)	0.12	0.72	1.4	4.2 (1.2-15)	5	0.025	-0.67	0.51 (0.17-1.6)	1.4	0.24	1	2.8 (1.1-7.1)	4.7	0.03	1	2.8 (1.1-7.1)	4.7	0.03
Antigen processing and presentation	Proteasome	WSB1	0.07	1.1 (0.88-1.3)	0.48	0.49	0.17	1.2 (0.8-1.8)	0.72	0.39	-0.0016	1 (0.65-1.5)	0	0.99	0.23	1.3 (0.76-2.1)	0.78	0.38	0.27	1.3 (0.86-2)	1.6	0.21	0.27	1.3 (0.86-2)	1.6	0.21
Antigen processing and presentation	Proteasome	WWP1	0.2	1.2 (1.1-1.4)	9	0.0026	0.22	1.2 (0.7-2.2)	0.56	0.45	0.2	1.2 (0.8-1.9)	0.85	0.36	0.25	1.3 (0.93-1.8)	2.2	0.13	0.22	1.3 (0.97-1.6)	3	0.084	0.22	1.3 (0.97-1.6)	3	0.084
Antigen processing and presentation	Proteasome	ZBTB16	-0.21	0.81 (0.7-0.94)	7.7	0.0055	-0.17	0.84 (0.48-1.5)	0.36	0.55	0.052	1.1 (0.77-1.4)	0.11	0.75	0.029	1 (0.73-1.5)	0.03	0.87	-0.25	0.78 (0.54-1.1)	1.8	0.19	-0.25	0.78 (0.54-1.1)	1.8	0.19
Immune checkpoints	co-inhibitory	CD160	-0.88	0.42 (0.23-0.76)	8.3	0.004	-1.3	0.27 (0.08-0.91)	4.5	0.034	-1.7	0.18 (0.036-0.87)	4.6	0.033	-0.43	0.65 (0.17-2.5)	0.38	0.54	-0.74	0.48 (0.15-1.5)	1.5	0.22	-0.74	0.48 (0.15-1.5)	1.5	0.22
Immune checkpoints	co-inhibitory	CTLA4	-0.65	0.52 (0.35-0.79)	9.7	0.0018	-0.87	0.42 (0.19-0.95)	4.4	0.036	-1.3	0.28 (0.12-0.69)	7.8	0.0052	-0.64	0.53 (0.18-1.6)	1.3	0.25	-0.99	0.37 (0.15-0.92)	4.6	0.032	-0.99	0.37 (0.15-0.92)	4.6	0.032
Immune checkpoints	co-inhibitory	LAG3	-0.36	0.7 (0.51-0.95)	5.2	0.023	-1	0.35 (0.19-0.67)	10	0.0016	-0.65	0.52 (0.25-1.1)	3.1	0.079	0.36	1.4 (0.53-3.9)	0.51	0.47	-0.76	0.47 (0.22-0.98)	4.1	0.043	-0.76	0.47 (0.22-0.98)	4.1	0.043
Immune checkpoints	co-inhibitory	LAIR1	-0.083	0.92 (0.7-1.2)	0.36	0.55	-0.59	0.55 (0.33-0.92)	5.2	0.023	-0.32	0.73 (0.36-1.5)	0.77	0.38	0.34	1.4 (0.65-3)	0.76	0.38	-0.0055	0.99 (0.57-1.7)	0	0.98	-0.0055	0.99 (0.57-1.7)	0	0.98
Immune checkpoints	co-inhibitory	LGALS9	-0.32	0.73 (0.57-0.93)	6.4	0.011	-0.7	0.5 (0.32-0.77)	9.7	0.0018	-0.74	0.48 (0.26-0.87)	5.9	0.015	0.13	1.1 (0.6-2.2)	0.16	0.69	-0.33	0.72 (0.42-1.2)	1.4	0.24	-0.33	0.72 (0.42-1.2)	1.4	0.24
Immune checkpoints	co-inhibitory	PDCD1	-0.43	0.65 (0.39-1.1)	2.6	0.11	-1.7	0.18 (0.056-0.55)	8.9	0.0028	-0.3	0.74 (0.21-2.6)	0.22	0.64	-1.2	0.29 (0.097-0.85)	5.1	0.024	0.37	1.4 (0.48-4.3)	0.43	0.51	0.37	1.4 (0.48-4.3)	0.43	0.51
Immune checkpoints	co-inhibitory	PDCD1LG2	-0.35	0.71 (0.36-1.4)	0.99	0.32	-0.78	0.46 (0.14-1.5)	1.6	0.21	-1.2	0.3 (0.051-1.8)	1.8	0.19	0.49	1.6 (0.29-9.2)	0.31	0.58	-1.8	0.16 (0.037-0.73)	5.6	0.017	-1.8	0.16 (0.037-0.73)	5.6	0.017
Immune checkpoints	co-inhibitory	PVR	0.33	1.4 (0.97-2)	3.2	0.076	0.39	1.5 (0.77-2.8)	1.4	0.24	0.29	1.3 (0.49-3.6)	0.32	0.57	-0.95	0.39 (0.1-1.5)	2	0.16	0.33	1.4 (0.52-3.7)	0.44	0.51	0.33	1.4 (0.52-3.7)	0.44	0.51
Immune checkpoints	co-inhibitory	PVRIG	-0.28	0.75 (0.59-0.96)	5.3	0.021	-0.33	0.72 (0.46-1.1)	2	0.16	-0.44	0.64 (0.37-1.1)	2.4	0.12	0.0069	1 (0.51-2)	0	0.98	-0.72	0.48 (0.28-0.84)	6.5	0.011	-0.72	0.48 (0.28-0.84)	6.5	0.011
Immune checkpoints	co-inhibitory	TNFRSF14	-0.62	0.54 (0.39-0.73)	15	9.7e-05	-0.55	0.57 (0.32-1)	3.4	0.065	-0.4	0.67 (0.31-1.5)	1	0.32	-0.19	0.82 (0.38-1.8)	0.25	0.62	-0.48	0.62 (0.31-1.2)	1.9	0.17	-0.48	0.62 (0.31-1.2)	1.9	0.17
Immune checkpoints	co-stimulatory	CD27	-0.44	0.64 (0.53-0.78)	19	1.3e-05	-0.51	0.6 (0.41-0.87)	7.4	0.0065	-0.63	0.54 (0.34-0.85)	7.1	0.0079	-0.094	0.91 (0.53-1.6)	0.11	0.74	-0.81	0.45 (0.28-0.72)	11	0.00098	-0.81	0.45 (0.28-0.72)	11	0.00098
Immune checkpoints	co-stimulatory	CD28	-0.49	0.61 (0.39-0.97)	4.4	0.035	-0.48	0.62 (0.29-1.3)	1.5	0.22	-0.71	0.49 (0.15-1.6)	1.4	0.23	-0.49	0.61 (0.15-2.4)	0.49	0.48	-0.55	0.58 (0.2-1.7)	1	0.31	-0.55	0.58 (0.2-1.7)	1	0.31
Immune checkpoints	co-stimulatory	CD40	-0.42	0.65 (0.48-0.89)	7.5	0.0063	-0.53	0.59 (0.35-1)	3.9	0.049	-0.69	0.5 (0.23-1.1)	3	0.081	-0.49	0.61 (0.25-1.5)	1.2	0.28	-0.65	0.52 (0.25-1.1)	3	0.084	-0.65	0.52 (0.25-1.1)	3	0.084
Immune checkpoints	co-stimulatory	CD40LG	-0.48	0.62 (0.35-1.1)	2.8	0.096	-0.86	0.42 (0.12-1.5)	1.9	0.17	-0.077	0.93 (0.28-3.1)	0.02	0.9	-0.18	0.84 (0.23-3.1)	0.07	0.79	-1	0.36 (0.11-1.2)	2.8	0.092	-1	0.36 (0.11-1.2)	2.8	0.092
Immune checkpoints	co-stimulatory	CD80	-0.36	0.7 (0.43-1.1)	2.1	0.15	-0.95	0.39 (0.15-1)	3.8	0.052	-1.1	0.35 (0.089-1.4)	2.3	0.13	0.25	1.3 (0.39-4.3)	0.17	0.68	-0.83	0.44 (0.16-1.2)	2.5	0.11	-0.83	0.44 (0.16-1.2)	2.5	0.11
Immune checkpoints	co-stimulatory	CD86	-0.2	0.82 (0.67-1)	3.7	0.054	-0.29	0.75 (0.53-1.1)	2.7	0.099	-0.45	0.63 (0.37-1.1)	2.8	0.096	-0.12	0.89 (0.51-1.5)	0.18	0.67	-0.34	0.71 (0.47-1.1)	2.6	0.11	-0.34	0.71 (0.47-1.1)	2.6	0.11
Immune checkpoints	co-stimulatory	ICOS	-0.47	0.62 (0.43-0.91)	5.9	0.015	-0.8	0.45 (0.23-0.89)	5.2	0.022	-0.6	0.55 (0.22-1.3)	1.8	0.19	-1.3	0.29 (0.078-1)	3.6	0.059	-0.79	0.45 (0.19-1.1)	3.3	0.071	-0.79	0.45 (0.19-1.1)	3.3	0.071
Immune checkpoints	co-stimulatory	ICOSLG	-0.62	0.54 (0.33-0.87)	6.3	0.012	-0.65	0.52 (0.19-1.4)	1.6	0.2	-1.6	0.2 (0.061-0.68)	6.7	0.0097	-1.5	0.23 (0.074-0.71)	6.5	0.011	-0.16	0.86 (0.29-2.5)	0.08	0.78	-0.16	0.86 (0.29-2.5)	0.08	0.78
Immune checkpoints	co-stimulatory	TNFRSF25	-0.098	0.91 (0.71-1.2)	0.6	0.44	0.096	1.1 (0.73-1.7)	0.22	0.64	-0.37	0.69 (0.36-1.3)	1.2	0.27	-0.086	0.92 (0.49-1.7)	0.07	0.79	-0.049	0.95 (0.54-1.7)	0.03	0.87	-0.049	0.95 (0.54-1.7)	0.03	0.87
Immune checkpoints	co-stimulatory	TNFRSF4	-0.17	0.84 (0.53-1.3)	0.54	0.46	-0.47	0.62 (0.24-1.6)	0.93	0.33	-1.3	0.27 (0.084-0.84)	5.1	0.024	-0.32	0.73 (0.22-2.5)	0.26	0.61	-0.28	0.75 (0.24-2.4)	0.24	0.63	-0.28	0.75 (0.24-2.4)	0.24	0.63
Immune checkpoints	co-stimulatory	TNFRSF9	-0.72	0.49 (0.33-0.71)	14	0.00023	-1.2	0.31 (0.15-0.63)	10	0.0013	-1.6	0.2 (0.059-0.68)	6.6	0.01	-0.45	0.64 (0.27-1.5)	0.99	0.32	-1.5	0.21 (0.085-0.54)	11	0.0011	-1.5	0.21 (0.085-0.54)	11	0.0011
Immune checkpoints	co-stimulatory	TNFSF4	0.18	1.2 (0.93-1.5)	1.9	0.17	-0.14	0.87 (0.48-1.6)	0.23	0.63	0.16	1.2 (0.63-2.2)	0.27	0.61	0.38	1.5 (0.88-2.4)	2.2	0.14	0.14	1.1 (0.62-2.1)	0.19	0.66	0.14	1.1 (0.62-2.1)	0.19	0.66
Immune checkpoints	co-stimulatory	TNFSF9	-0.5	0.61 (0.3-1.2)	1.9	0.17	-1.3	0.27 (0.063-1.2)	3.1	0.079	-0.46	0.63 (0.13-3)	0.33	0.56	-1.4	0.24 (0.05-1.2)	3	0.082	-1.1	0.34 (0.047-2.5)	1.2	0.28	-1.1	0.34 (0.047-2.5)	1.2	0.28
Immune signaling pathways	IFN signaling	JAK1	-0.42	0.66 (0.5-0.87)	8.9	0.0028	0.093	1.1 (0.6-2)	0.09	0.76	0.5	1.6 (0.79-3.4)	1.8	0.18	-0.21	0.81 (0.43-1.5)	0.42	0.52	-0.7	0.5 (0.28-0.89)	5.6	0.018	-0.7	0.5 (0.28-0.89)	5.6	0.018
Immune signaling pathways	IFN signaling	STAT1	0.00082	1 (0.9-1.1)	0	0.99	-0.27	0.76 (0.61-0.95)	5.7	0.017	-0.11	0.89 (0.68-1.2)	0.65	0.42	0.11	1.1 (0.83-1.5)	0.49	0.48	-0.11	0.89 (0.72-1.1)	1	0.32	-0.11	0.89 (0.72-1.1)	1	0.32
Immune signaling pathways	IFN signaling	STAT2	-0.26	0.77 (0.52-1.1)	1.8	0.19	-0.94	0.39 (0.17-0.89)	5	0.025	-0.79	0.46 (0.19-1.1)	2.9	0.087	0.39	1.5 (0.57-3.8)	0.64	0.42	-0.64	0.53 (0.24-1.2)	2.4	0.12	-0.64	0.53 (0.24-1.2)	2.4	0.12
Immune signaling pathways	IFN signaling type I	APOBEC3G	-0.14	0.87 (0.74-1)	3.1	0.08	-0.26	0.77 (0.58-1)	3.2	0.072	-0.26	0.77 (0.52-1.1)	1.6	0.2	0.12	1.1 (0.73-1.7)	0.29	0.59	-0.25	0.78 (0.57-1.1)	2.3	0.13	-0.25	0.78 (0.57-1.1)	2.3	0.13
Immune signaling pathways	IFN signaling type I	DDX41	0.71	2 (1.5-2.7)	24	1.2e-06	0.52	1.7 (1-2.8)	3.9	0.048	0.93	2.5 (1.3-5.1)	6.8	0.0091	0.21	1.2 (0.56-2.7)	0.27	0.6	0.67	2 (1.1-3.4)	5.7	0.017	0.67	2 (1.1-3.4)	5.7	0.017
Immune signaling pathways	IFN signaling type I	IFI27	0.019	1 (0.92-1.1)	0.14	0.71	-0.097	0.91 (0.76-1.1)	1.1	0.3	-0.3	0.74 (0.58-0.95)	5.7	0.017	0.091	1.1 (0.87-1.4)	0.63	0.43	-0.044	0.96 (0.81-1.1)	0.27	0.6	-0.044	0.96 (0.81-1.1)	0.27	0.6
Immune signaling pathways	IFN signaling type I	IFI44	0.063	1.1 (0.95-1.2)	1.3	0.26	0.014	1 (0.82-1.3)	0.02	0.9	-0.11	0.89 (0.7-1.1)	0.8	0.37	0.17	1.2 (0.89-1.6)	1.3	0.25	-0.06	0.94 (0.76-1.2)	0.29	0.59	-0.06	0.94 (0.76-1.2)	0.29	0.59
Immune signaling pathways	IFN signaling type I	IFI44L	0.028	1 (0.94-1.1)	0.39	0.53	-0.055	0.95 (0.79-1.1)	0.35	0.55	-0.12	0.89 (0.72-1.1)	1.3	0.26	0.062	1.1 (0.86-1.3)	0.31	0.58	-0.032	0.97 (0.81-1.2)	0.13	0.72	-0.032	0.97 (0.81-1.2)	0.13	0.72
Immune signaling pathways	IFN signaling type I	IFNAR1	0.11	1.1 (0.69-1.8)	0.19	0.66	0.28	1.3 (0.57-3.1)	0.42	0.52	0.29	1.3 (0.37-4.9)	0.2	0.66	-0.18	0.84 (0.29-2.5)	0.11	0.74	0.36	1.4 (0.49-4.2)	0.44	0.51	0.36	1.4 (0.49-4.2)	0.44	0.51
Immune signaling pathways	IFN signaling type I	IFNAR2	0.25	1.3 (0.95-1.7)	2.7	0.1	0.26	1.3 (0.71-2.4)	0.74	0.39	0.2	1.2 (0.5-3)	0.2	0.65	0.43	1.5 (0.72-3.3)	1.2	0.27	0.12	1.1 (0.57-2.2)	0.12	0.73	0.12	1.1 (0.57-2.2)	0.12	0.73
Immune signaling pathways	IFN signaling type I	IRF7	0.049	1.1 (0.89-1.2)	0.35	0.55	-0.05	0.95 (0.72-1.3)	0.13	0.72	-0.15	0.86 (0.61-1.2)	0.79	0.37	0.073	1.1 (0.69-1.7)	0.1	0.75	-0.0037	1 (0.7-1.4)	0	0.98	-0.0037	1 (0.7-1.4)	0	0.98
Immune signaling pathways	IFN signaling type I	IRF9	0.074	1.1 (0.89-1.3)	0.57	0.45	-0.31	0.74 (0.5-1.1)	2.4	0.13	-0.085	0.92 (0.61-1.4)	0.16	0.69	0.09	1.1 (0.71-1.7)	0.16	0.69	0.0085	1 (0.71-1.4)	0	0.96	0.0085	1 (0.71-1.4)	0	0.96
Immune signaling pathways	IFN signaling type I	MX1	0.023	1 (0.93-1.1)	0.2	0.65	-0.17	0.85 (0.68-1.1)	2.2	0.14	-0.13	0.88 (0.71-1.1)	1.3	0.26	0.088	1.1 (0.87-1.4)	0.56	0.45	-0.095	0.91 (0.75-1.1)	0.93	0.33	-0.095	0.91 (0.75-1.1)	0.93	0.33
Immune signaling pathways	IFN signaling type I	OASL	0.04	1 (0.87-1.2)	0.2	0.65	-0.27	0.76 (0.53-1.1)	2.2	0.14	-0.37	0.69 (0.44-1.1)	2.5	0.11	0.36	1.4 (0.87-2.3)	2	0.16	-0.18	0.84 (0.56-1.3)	0.74	0.39	-0.18	0.84 (0.56-1.3)	0.74	0.39
Immune signaling pathways	IFN signaling type I	TYK2	-0.44	0.65 (0.45-0.92)	5.7	0.017	-0.21	0.81 (0.45-1.5)	0.49	0.48	-0.078	0.92 (0.32-2.7)	0.02	0.88	-0.64	0.52 (0.19-1.5)	1.5	0.22	-0.4	0.67 (0.34-1.3)	1.3	0.25	-0.4	0.67 (0.34-1.3)	1.3	0.25
Immune signaling pathways	IFN signaling type II	DDX58	0.045	1 (0.91-1.2)	0.42	0.52	0.012	1 (0.8-1.3)	0.01	0.92	-0.21	0.81 (0.58-1.1)	1.5	0.22	0.013	1 (0.69-1.5)	0	0.95	0.038	1 (0.8-1.3)	0.08	0.78	0.038	1 (0.8-1.3)	0.08	0.78
Immune signaling pathways	IFN signaling type II	IFI16	-0.1	0.9 (0.79-1)	2.3	0.13	-0.041	0.96 (0.74-1.2)	0.1	0.75	-0.22	0.8 (0.57-1.1)	1.6	0.2	0.16	1.2 (0.84-1.6)	0.86	0.35	-0.41	0.66 (0.47-0.95)	5.2	0.023	-0.41	0.66 (0.47-0.95)	5.2	0.023
Immune signaling pathways	IFN signaling type II	IFNG	-0.82	0.44 (0.28-0.7)	12	0.00046	-1.3	0.27 (0.12-0.61)	9.8	0.0018	-1	0.36 (0.12-1.1)	3.4	0.066	-0.12	0.89 (0.22-3.7)	0.03	0.87	-2.1	0.12 (0.033-0.42)	11	0.00099	-2.1	0.12 (0.033-0.42)	11	0.00099
Immune signaling pathways	IFN signaling type II	IFNGR1	-0.27	0.77 (0.64-0.92)	8.2	0.0041	-0.088	0.92 (0.67-1.3)	0.3	0.58	0.0035	1 (0.6-1.7)	0	0.99	-0.24	0.79 (0.49-1.3)	0.95	0.33	-0.41	0.66 (0.44-1)	3.9	0.048	-0.41	0.66 (0.44-1)	3.9	0.048
Immune signaling pathways	IFN signaling type II	IFNGR2	-0.79	0.45 (0.31-0.66)	18	2.6e-05	-0.39	0.68 (0.33-1.4)	1.1	0.29	-0.78	0.46 (0.17-1.2)	2.5	0.11	-0.56	0.57 (0.27-1.2)	2.1	0.14	-0.69	0.5 (0.22-1.1)	2.8	0.095	-0.69	0.5 (0.22-1.1)	2.8	0.095
Immune signaling pathways	IFN signaling type II	JAK2	-0.67	0.51 (0.39-0.68)	22	3.2e-06	-0.35	0.7 (0.45-1.1)	2.3	0.13	-0.96	0.38 (0.17-0.85)	5.6	0.017	-0.65	0.52 (0.27-1)	3.6	0.059	-1	0.37 (0.2-0.67)	11	0.0012	-1	0.37 (0.2-0.67)	11	0.0012
Immune signaling pathways	NfkB pathway	GBP1	-0.076	0.93 (0.84-1)	2.6	0.11	-0.24	0.79 (0.65-0.95)	6	0.015	-0.27	0.77 (0.59-1)	4	0.046	0.054	1.1 (0.8-1.4)	0.14	0.71	-0.24	0.79 (0.63-0.98)	4.6	0.033	-0.24	0.79 (0.63-0.98)	4.6	0.033
Immune signaling pathways	NfkB pathway	IL32	-0.14	0.87 (0.76-1)	3.8	0.052	-0.17	0.85 (0.66-1.1)	1.7	0.19	-0.31	0.73 (0.47-1.1)	2	0.16	-0.24	0.78 (0.53-1.2)	1.5	0.23	-0.24	0.79 (0.56-1.1)	2	0.16	-0.24	0.79 (0.56-1.1)	2	0.16
Immune signaling pathways	NfkB pathway	IRF1	-0.49	0.61 (0.49-0.76)	19	1.1e-05	-0.59	0.56 (0.39-0.79)	11	0.0011	-0.47	0.63 (0.4-0.99)	4	0.045	-0.36	0.7 (0.38-1.3)	1.3	0.25	-0.71	0.49 (0.3-0.8)	8.2	0.0041	-0.71	0.49 (0.3-0.8)	8.2	0.0041
Immune signaling pathways	NfkB pathway	NFKBIE	-0.31	0.74 (0.55-0.99)	4.1	0.043	-0.55	0.58 (0.34-0.98)	4.2	0.041	-0.62	0.54 (0.22-1.3)	1.8	0.18	-0.32	0.73 (0.32-1.6)	0.58	0.44	-0.38	0.68 (0.33-1.4)	1.1	0.29	-0.38	0.68 (0.33-1.4)	1.1	0.29
Immune signaling pathways	NfkB pathway	SH2B3	-0.22	0.8 (0.61-1.1)	2.5	0.11	-0.15	0.86 (0.55-1.4)	0.4	0.53	-0.14	0.87 (0.43-1.7)	0.16	0.68	-0.15	0.86 (0.44-1.7)	0.17	0.68	0.0061	1 (0.54-1.9)	0	0.98	0.0061	1 (0.54-1.9)	0	0.98
Immune signaling pathways	NfkB pathway	TNFAIP3	-0.16	0.85 (0.71-1)	3.5	0.061	-0.24	0.79 (0.55-1.1)	1.8	0.18	-0.33	0.72 (0.42-1.2)	1.6	0.21	-0.065	0.94 (0.59-1.5)	0.07	0.78	-0.13	0.87 (0.61-1.3)	0.52	0.47	-0.13	0.87 (0.61-1.3)	0.52	0.47
Immune signaling pathways	PI3K neg regulator	GSK3B	0.2	1.2 (0.99-1.5)	3.4	0.066	0.17	1.2 (0.79-1.8)	0.68	0.41	0.057	1.1 (0.6-1.9)	0.04	0.84	-0.44	0.65 (0.35-1.2)	1.9	0.16	0.39	1.5 (0.93-2.3)	2.7	0.1	0.39	1.5 (0.93-2.3)	2.7	0.1
Immune signaling pathways	PI3K neg regulator	TSC1	0.22	1.2 (0.92-1.7)	2.1	0.15	0.69	2 (1.1-3.6)	5.3	0.021	0.36	1.4 (0.7-2.9)	0.96	0.33	0.48	1.6 (0.68-3.8)	1.2	0.28	0.66	1.9 (0.98-3.8)	3.6	0.058	0.66	1.9 (0.98-3.8)	3.6	0.058
Immune signaling pathways	PI3K neg regulator	TSC2	-0.16	0.86 (0.68-1.1)	1.7	0.19	-0.3	0.74 (0.44-1.2)	1.3	0.26	-0.36	0.7 (0.34-1.4)	1	0.32	-0.18	0.84 (0.51-1.4)	0.48	0.49	0.0046	1 (0.62-1.6)	0	0.98	0.0046	1 (0.62-1.6)	0	0.98
Immune signaling pathways	PI3K pathway pos regulator	MDM2	0.42	1.5 (1.1-2.1)	7.2	0.0072	-0.37	0.69 (0.17-2.8)	0.27	0.6	0.75	2.1 (0.96-4.7)	3.4	0.065	0.89	2.4 (1.1-5.3)	5.1	0.024	0.23	1.3 (0.82-1.9)	1.1	0.29	0.23	1.3 (0.82-1.9)	1.1	0.29
Immune signaling pathways	Wnt pathway	EFNB3	0.0029	1 (0.7-1.4)	0	0.99	0.32	1.4 (0.68-2.8)	0.79	0.37	-0.1	0.9 (0.33-2.4)	0.04	0.84	0.38	1.5 (0.65-3.3)	0.83	0.36	-0.14	0.87 (0.45-1.7)	0.18	0.68	-0.14	0.87 (0.45-1.7)	0.18	0.68
Immune signaling pathways	Wnt pathway	TCF12	0.25	1.3 (0.98-1.7)	3.3	0.069	0.73	2.1 (1.2-3.5)	7.8	0.0051	0.47	1.6 (0.83-3.1)	2	0.16	0.44	1.6 (0.78-3.1)	1.6	0.21	0.26	1.3 (0.72-2.4)	0.75	0.38	0.26	1.3 (0.72-2.4)	0.75	0.38
Immunogenic cell death	Apoptosis	ABL1	-0.15	0.86 (0.68-1.1)	1.6	0.21	0.15	1.2 (0.73-1.8)	0.42	0.52	-0.61	0.54 (0.29-1)	3.9	0.049	0.081	1.1 (0.61-1.9)	0.08	0.78	-0.29	0.75 (0.45-1.2)	1.3	0.26	-0.29	0.75 (0.45-1.2)	1.3	0.26
Immunogenic cell death	Apoptosis	CFLAR	-0.36	0.7 (0.55-0.89)	8.4	0.0038	-0.73	0.48 (0.3-0.77)	9.3	0.0023	-0.47	0.62 (0.33-1.2)	2.2	0.14	0.19	1.2 (0.66-2.2)	0.37	0.54	-0.44	0.65 (0.38-1.1)	2.7	0.1	-0.44	0.65 (0.38-1.1)	2.7	0.1
Immunogenic cell death	Apoptosis	CIDEA	-0.13	0.88 (0.67-1.2)	0.83	0.36	0.62	1.9 (0.94-3.7)	3.2	0.074	-0.25	0.78 (0.33-1.8)	0.34	0.56	-0.11	0.89 (0.47-1.7)	0.12	0.73	0.29	1.3 (0.54-3.3)	0.4	0.52	0.29	1.3 (0.54-3.3)	0.4	0.52
Immunogenic cell death	Apoptosis	CIDEB	-0.04	0.96 (0.69-1.3)	0.06	0.81	-0.21	0.81 (0.39-1.7)	0.31	0.58	1	2.8 (1.1-7.1)	5	0.025	-0.42	0.66 (0.33-1.3)	1.4	0.24	0.12	1.1 (0.62-2.1)	0.17	0.68	0.12	1.1 (0.62-2.1)	0.17	0.68
Immunogenic cell death	Apoptosis	CRADD	-0.28	0.76 (0.52-1.1)	2.2	0.14	-0.43	0.65 (0.27-1.6)	0.87	0.35	-0.2	0.82 (0.39-1.7)	0.28	0.6	-1	0.36 (0.14-0.95)	4.3	0.038	-0.29	0.75 (0.36-1.5)	0.63	0.43	-0.29	0.75 (0.36-1.5)	0.63	0.43
Immunogenic cell death	Apoptosis	DAPK1	0.13	1.1 (0.96-1.3)	2.3	0.13	-0.042	0.96 (0.68-1.4)	0.06	0.81	0.019	1 (0.6-1.7)	0	0.94	0.25	1.3 (0.73-2.3)	0.75	0.39	0.13	1.1 (0.75-1.7)	0.39	0.53	0.13	1.1 (0.75-1.7)	0.39	0.53
Immunogenic cell death	Apoptosis	FADD	0.33	1.4 (1.2-1.7)	12	0.0005	0.22	1.2 (0.69-2.3)	0.53	0.47	0.27	1.3 (0.82-2.1)	1.3	0.26	0.17	1.2 (0.73-1.9)	0.47	0.49	0.032	1 (0.76-1.4)	0.04	0.84	0.032	1 (0.76-1.4)	0.04	0.84
Immunogenic cell death	Apoptosis	TNFRSF10B	-0.02	0.98 (0.8-1.2)	0.04	0.85	0.026	1 (0.69-1.5)	0.02	0.9	0.62	1.9 (1.1-3.1)	6.1	0.013	-0.11	0.9 (0.55-1.5)	0.18	0.67	0.056	1.1 (0.72-1.5)	0.09	0.77	0.056	1.1 (0.72-1.5)	0.09	0.77
Immunogenic cell death	Apoptosis	TNFRSF25	-0.098	0.91 (0.71-1.2)	0.6	0.44	0.096	1.1 (0.73-1.7)	0.22	0.64	-0.37	0.69 (0.36-1.3)	1.2	0.27	-0.086	0.92 (0.49-1.7)	0.07	0.79	-0.049	0.95 (0.54-1.7)	0.03	0.87	-0.049	0.95 (0.54-1.7)	0.03	0.87
Immunogenic cell death	Apoptosis	TP53	0.1	1.1 (0.93-1.3)	1.3	0.25	0.36	1.4 (1.1-1.9)	6.5	0.011	-0.22	0.8 (0.54-1.2)	1.2	0.27	0.089	1.1 (0.68-1.7)	0.14	0.71	0.0052	1 (0.69-1.5)	0	0.98	0.0052	1 (0.69-1.5)	0	0.98
Immunogenic cell death	Autophagy	ACTA2	0.077	1.1 (0.92-1.3)	0.94	0.33	0.29	1.3 (1-1.8)	4	0.047	0.41	1.5 (0.89-2.5)	2.3	0.13	0.15	1.2 (0.77-1.8)	0.51	0.48	0.31	1.4 (0.94-2)	2.6	0.11	0.31	1.4 (0.94-2)	2.6	0.11
Immunogenic cell death	Autophagy	AMBRA1	-0.58	0.56 (0.31-0.99)	4	0.046	-0.093	0.91 (0.3-2.8)	0.03	0.87	0.32	1.4 (0.28-6.7)	0.16	0.69	-2.4	0.089 (0.02-0.39)	10	0.0014	-0.27	0.77 (0.24-2.4)	0.21	0.65	-0.27	0.77 (0.24-2.4)	0.21	0.65
Immunogenic cell death	Autophagy	APP	-0.1	0.9 (0.76-1.1)	1.4	0.23	0.14	1.2 (0.83-1.6)	0.74	0.39	-0.29	0.75 (0.45-1.2)	1.3	0.25	0.046	1 (0.68-1.6)	0.04	0.83	-0.077	0.93 (0.65-1.3)	0.19	0.67	-0.077	0.93 (0.65-1.3)	0.19	0.67
Immunogenic cell death	Autophagy	ATG12	0.26	1.3 (1-1.6)	4.8	0.029	0.23	1.3 (0.8-2)	0.98	0.32	0.28	1.3 (0.78-2.3)	1.1	0.3	0.66	1.9 (1-3.6)	4.2	0.041	0.43	1.5 (0.93-2.5)	2.8	0.095	0.43	1.5 (0.93-2.5)	2.8	0.095
Immunogenic cell death	Autophagy	ATG16L1	-0.11	0.89 (0.59-1.4)	0.28	0.6	-0.078	0.92 (0.35-2.4)	0.03	0.87	-0.4	0.67 (0.23-2)	0.52	0.47	0.1	1.1 (0.48-2.6)	0.06	0.81	-0.27	0.76 (0.33-1.8)	0.4	0.52	-0.27	0.76 (0.33-1.8)	0.4	0.52
Immunogenic cell death	Autophagy	BAD	-0.11	0.9 (0.67-1.2)	0.51	0.47	-0.39	0.68 (0.35-1.3)	1.3	0.26	-0.62	0.54 (0.21-1.4)	1.7	0.2	-0.084	0.92 (0.5-1.7)	0.07	0.79	-0.11	0.9 (0.52-1.5)	0.15	0.7	-0.11	0.9 (0.52-1.5)	0.15	0.7
Immunogenic cell death	Autophagy	BAK1	-0.13	0.88 (0.6-1.3)	0.45	0.5	-0.85	0.43 (0.21-0.89)	5.2	0.023	-0.82	0.44 (0.16-1.2)	2.5	0.11	-0.091	0.91 (0.35-2.4)	0.03	0.85	-0.78	0.46 (0.18-1.2)	2.5	0.11	-0.78	0.46 (0.18-1.2)	2.5	0.11
Immunogenic cell death	Autophagy	BCL2	-0.11	0.9 (0.8-1)	3.8	0.053	0.25	1.3 (1-1.6)	4.9	0.026	-0.12	0.89 (0.62-1.3)	0.45	0.5	-0.31	0.74 (0.51-1.1)	2.8	0.097	-0.15	0.86 (0.64-1.1)	1	0.3	-0.15	0.86 (0.64-1.1)	1	0.3
Immunogenic cell death	Autophagy	BCL2L1	0.32	1.4 (1-1.9)	4.3	0.037	-0.31	0.74 (0.36-1.5)	0.68	0.41	0.39	1.5 (0.76-2.9)	1.3	0.25	0.26	1.3 (0.59-2.8)	0.42	0.52	0.21	1.2 (0.65-2.3)	0.42	0.52	0.21	1.2 (0.65-2.3)	0.42	0.52
Immunogenic cell death	Autophagy	BECN1	0.034	1 (0.82-1.3)	0.08	0.77	0.31	1.4 (0.78-2.4)	1.2	0.27	0.056	1.1 (0.59-1.9)	0.04	0.85	0.035	1 (0.53-2)	0.01	0.92	0.24	1.3 (0.75-2.2)	0.82	0.36	0.24	1.3 (0.75-2.2)	0.82	0.36
Immunogenic cell death	Autophagy	BID	0.14	1.2 (0.93-1.4)	1.7	0.2	0.27	1.3 (0.81-2.1)	1.2	0.27	-0.047	0.95 (0.54-1.7)	0.03	0.87	0.22	1.2 (0.68-2.3)	0.52	0.47	-0.26	0.77 (0.48-1.2)	1.1	0.29	-0.26	0.77 (0.48-1.2)	1.1	0.29
Immunogenic cell death	Autophagy	BNIP3	0.24	1.3 (1.1-1.5)	11	0.00079	0.21	1.2 (0.95-1.6)	2.4	0.12	0.15	1.2 (0.84-1.6)	0.85	0.36	0.088	1.1 (0.73-1.6)	0.19	0.67	0.2	1.2 (0.97-1.5)	2.8	0.092	0.2	1.2 (0.97-1.5)	2.8	0.092
Immunogenic cell death	Autophagy	CASP3	0.21	1.2 (0.92-1.7)	2	0.16	-0.25	0.78 (0.44-1.4)	0.77	0.38	0.12	1.1 (0.55-2.3)	0.11	0.74	0.62	1.9 (0.81-4.3)	2.1	0.15	-0.16	0.85 (0.46-1.6)	0.27	0.61	-0.16	0.85 (0.46-1.6)	0.27	0.61
Immunogenic cell death	Autophagy	CASP8	-0.36	0.7 (0.55-0.88)	9.4	0.0022	-0.51	0.6 (0.39-0.92)	5.4	0.02	-0.029	0.97 (0.57-1.7)	0.01	0.92	-0.19	0.83 (0.48-1.4)	0.45	0.5	-0.35	0.71 (0.44-1.1)	2	0.16	-0.35	0.71 (0.44-1.1)	2	0.16
Immunogenic cell death	Autophagy	CDKN1B	0.012	1 (0.86-1.2)	0.02	0.89	0.19	1.2 (0.82-1.8)	0.92	0.34	0.21	1.2 (0.76-2)	0.73	0.39	0.61	1.8 (1.1-3)	6.1	0.014	-0.0037	1 (0.77-1.3)	0	0.98	-0.0037	1 (0.77-1.3)	0	0.98
Immunogenic cell death	Autophagy	CDKN2A	0.062	1.1 (0.95-1.2)	1.1	0.3	0.14	1.1 (0.98-1.3)	2.9	0.09	-0.013	0.99 (0.62-1.6)	0	0.96	-1.3	0.26 (0.11-0.64)	8.8	0.003	0.015	1 (0.61-1.7)	0	0.95	0.015	1 (0.61-1.7)	0	0.95
Immunogenic cell death	Autophagy	CLN3	-0.26	0.77 (0.61-0.96)	5.2	0.022	-0.35	0.7 (0.43-1.2)	1.9	0.17	-0.48	0.62 (0.36-1.1)	3.1	0.078	-0.28	0.76 (0.46-1.3)	1.2	0.28	-0.63	0.53 (0.32-0.9)	5.5	0.019	-0.63	0.53 (0.32-0.9)	5.5	0.019
Immunogenic cell death	Autophagy	CTSB	0.0072	1 (0.83-1.2)	0.01	0.94	-0.17	0.84 (0.57-1.2)	0.75	0.39	-0.12	0.88 (0.52-1.5)	0.21	0.65	-0.13	0.88 (0.55-1.4)	0.3	0.59	0.11	1.1 (0.73-1.7)	0.26	0.61	0.11	1.1 (0.73-1.7)	0.26	0.61
Immunogenic cell death	Autophagy	CTSS	-0.23	0.79 (0.69-0.91)	10	0.0014	-0.41	0.67 (0.51-0.86)	9.4	0.0021	-0.5	0.61 (0.42-0.88)	6.9	0.0084	0.11	1.1 (0.75-1.7)	0.29	0.59	-0.34	0.71 (0.52-0.97)	4.8	0.029	-0.34	0.71 (0.52-0.97)	4.8	0.029
Immunogenic cell death	Autophagy	CXCR4	0.03	1 (0.9-1.2)	0.19	0.67	0.046	1 (0.78-1.4)	0.1	0.76	0.014	1 (0.65-1.6)	0	0.95	0.37	1.4 (1-2)	4.6	0.032	-0.19	0.83 (0.62-1.1)	1.6	0.2	-0.19	0.83 (0.62-1.1)	1.6	0.2
Immunogenic cell death	Autophagy	DAPK1	0.13	1.1 (0.96-1.3)	2.3	0.13	-0.042	0.96 (0.68-1.4)	0.06	0.81	0.019	1 (0.6-1.7)	0	0.94	0.25	1.3 (0.73-2.3)	0.75	0.39	0.13	1.1 (0.75-1.7)	0.39	0.53	0.13	1.1 (0.75-1.7)	0.39	0.53
Immunogenic cell death	Autophagy	DRAM1	-0.2	0.82 (0.68-0.99)	4.4	0.035	-0.48	0.62 (0.43-0.88)	7.3	0.0069	-0.099	0.91 (0.56-1.5)	0.17	0.68	-0.13	0.87 (0.55-1.4)	0.31	0.58	-0.19	0.82 (0.56-1.2)	0.99	0.32	-0.19	0.82 (0.56-1.2)	0.99	0.32
Immunogenic cell death	Autophagy	EIF4G1	0.19	1.2 (1-1.5)	4.1	0.042	-0.12	0.89 (0.6-1.3)	0.36	0.55	0.24	1.3 (0.81-2)	1.1	0.29	0.29	1.3 (0.86-2.1)	1.7	0.19	-0.086	0.92 (0.64-1.3)	0.21	0.64	-0.086	0.92 (0.64-1.3)	0.21	0.64
Immunogenic cell death	Autophagy	ESR1	-0.0086	0.99 (0.94-1)	0.1	0.75	-0.053	0.95 (0.74-1.2)	0.18	0.68	0.056	1.1 (0.91-1.2)	0.52	0.47	0.17	1.2 (0.89-1.6)	1.4	0.24	0.34	1.4 (1-1.9)	5.1	0.024	0.34	1.4 (1-1.9)	5.1	0.024
Immunogenic cell death	Autophagy	FAS	-0.27	0.76 (0.64-0.91)	8.7	0.0032	-0.24	0.79 (0.59-1.1)	2.6	0.11	-0.011	0.99 (0.61-1.6)	0	0.96	0.17	1.2 (0.74-1.9)	0.49	0.49	-0.43	0.65 (0.42-1)	3.7	0.054	-0.43	0.65 (0.42-1)	3.7	0.054
Immunogenic cell death	Autophagy	GAA	-0.12	0.89 (0.72-1.1)	1.1	0.3	-0.46	0.63 (0.43-0.93)	5.3	0.021	-0.24	0.79 (0.47-1.3)	0.8	0.37	0.19	1.2 (0.71-2.1)	0.49	0.48	-0.17	0.84 (0.54-1.3)	0.62	0.43	-0.17	0.84 (0.54-1.3)	0.62	0.43
Immunogenic cell death	Autophagy	GABARAP	-0.55	0.58 (0.39-0.86)	7.1	0.0075	0.25	1.3 (0.52-3.2)	0.3	0.58	0.26	1.3 (0.31-5.4)	0.13	0.72	-0.57	0.57 (0.25-1.3)	1.8	0.18	-0.62	0.54 (0.23-1.3)	1.9	0.16	-0.62	0.54 (0.23-1.3)	1.9	0.16
Immunogenic cell death	Autophagy	HDAC1	-0.12	0.89 (0.66-1.2)	0.7	0.4	-0.24	0.79 (0.48-1.3)	0.9	0.34	0.0091	1 (0.53-1.9)	0	0.98	-0.97	0.38 (0.18-0.81)	6.3	0.012	0.09	1.1 (0.61-2)	0.09	0.76	0.09	1.1 (0.61-2)	0.09	0.76
Immunogenic cell death	Autophagy	HGS	0.2	1.2 (0.9-1.6)	1.7	0.19	-0.22	0.8 (0.43-1.5)	0.47	0.49	0.1	1.1 (0.55-2.2)	0.08	0.77	-0.32	0.73 (0.36-1.5)	0.79	0.37	0.32	1.4 (0.75-2.5)	1	0.31	0.32	1.4 (0.75-2.5)	1	0.31
Immunogenic cell death	Autophagy	HSP90AA1	0.19	1.2 (0.94-1.6)	2.2	0.14	0.12	1.1 (0.66-1.9)	0.19	0.66	0.1	1.1 (0.59-2.1)	0.1	0.75	0.042	1 (0.6-1.8)	0.02	0.88	-0.082	0.92 (0.58-1.5)	0.12	0.73	-0.082	0.92 (0.58-1.5)	0.12	0.73
Immunogenic cell death	Autophagy	HTT	-0.28	0.76 (0.52-1.1)	2.1	0.15	0.089	1.1 (0.45-2.6)	0.04	0.84	-0.53	0.59 (0.22-1.6)	1.1	0.3	-0.49	0.61 (0.22-1.7)	0.85	0.36	-0.091	0.91 (0.5-1.7)	0.09	0.77	-0.091	0.91 (0.5-1.7)	0.09	0.77
Immunogenic cell death	Autophagy	IGF1	-0.12	0.88 (0.8-0.98)	5.8	0.016	0.22	1.3 (0.99-1.6)	3.4	0.063	0.046	1 (0.73-1.5)	0.06	0.8	0.12	1.1 (0.88-1.4)	0.91	0.34	-0.27	0.76 (0.52-1.1)	2	0.16	-0.27	0.76 (0.52-1.1)	2	0.16
Immunogenic cell death	Autophagy	MAPK14	-0.11	0.9 (0.66-1.2)	0.53	0.47	-0.38	0.68 (0.38-1.2)	1.7	0.19	-0.41	0.66 (0.32-1.4)	1.2	0.27	0.07	1.1 (0.48-2.4)	0.03	0.86	-0.56	0.57 (0.3-1.1)	2.9	0.088	-0.56	0.57 (0.3-1.1)	2.9	0.088
Immunogenic cell death	Autophagy	MAPK8	-0.25	0.78 (0.5-1.2)	1.3	0.25	-0.26	0.77 (0.32-1.8)	0.33	0.56	-0.52	0.6 (0.19-1.9)	0.79	0.38	-0.41	0.67 (0.24-1.8)	0.63	0.43	-0.35	0.7 (0.26-1.9)	0.5	0.48	-0.35	0.7 (0.26-1.9)	0.5	0.48
Immunogenic cell death	Autophagy	MTOR	-0.41	0.66 (0.4-1.1)	2.5	0.12	-0.86	0.42 (0.14-1.3)	2.4	0.12	-0.33	0.72 (0.19-2.7)	0.24	0.62	-0.47	0.62 (0.22-1.8)	0.78	0.38	-0.24	0.78 (0.27-2.3)	0.2	0.65	-0.24	0.78 (0.27-2.3)	0.2	0.65
Immunogenic cell death	Autophagy	NPC1	0.24	1.3 (0.99-1.6)	3.7	0.056	0.26	1.3 (0.82-2.1)	1.3	0.26	-0.026	0.97 (0.46-2.1)	0	0.95	0.11	1.1 (0.57-2.2)	0.1	0.75	0.11	1.1 (0.66-1.9)	0.18	0.67	0.11	1.1 (0.66-1.9)	0.18	0.67
Immunogenic cell death	Autophagy	RB1	0.059	1.1 (0.87-1.3)	0.35	0.55	-0.086	0.92 (0.63-1.3)	0.2	0.66	0.42	1.5 (0.93-2.5)	2.8	0.091	0.33	1.4 (0.89-2.2)	2	0.15	0.14	1.2 (0.79-1.7)	0.55	0.46	0.14	1.2 (0.79-1.7)	0.55	0.46
Immunogenic cell death	Autophagy	RGS19	0.36	1.4 (1-2.1)	3.8	0.051	-0.24	0.79 (0.4-1.6)	0.47	0.49	0.22	1.2 (0.46-3.4)	0.18	0.67	-0.028	0.97 (0.34-2.8)	0	0.96	0.48	1.6 (0.76-3.5)	1.6	0.21	0.48	1.6 (0.76-3.5)	1.6	0.21
Immunogenic cell death	Autophagy	RPS6KB1	0.23	1.3 (1-1.5)	5.4	0.02	0.13	1.1 (0.71-1.8)	0.31	0.58	0.044	1 (0.71-1.5)	0.05	0.82	0.56	1.8 (1.1-2.8)	5.6	0.018	0.041	1 (0.71-1.5)	0.04	0.84	0.041	1 (0.71-1.5)	0.04	0.84
Immunogenic cell death	Autophagy	SNCA	-0.31	0.74 (0.52-1)	3.1	0.079	-0.11	0.9 (0.49-1.7)	0.12	0.73	0.16	1.2 (0.42-3.2)	0.09	0.76	0.59	1.8 (0.74-4.4)	1.7	0.2	-0.43	0.65 (0.28-1.5)	0.97	0.32	-0.43	0.65 (0.28-1.5)	0.97	0.32
Immunogenic cell death	Autophagy	SQSTM1	0.2	1.2 (0.93-1.6)	2.1	0.15	-0.19	0.83 (0.5-1.4)	0.51	0.48	0.58	1.8 (0.98-3.2)	3.6	0.057	0.051	1.1 (0.53-2.1)	0.02	0.88	0.31	1.4 (0.82-2.3)	1.5	0.23	0.31	1.4 (0.82-2.3)	1.5	0.23
Immunogenic cell death	Autophagy	TGM2	-0.021	0.98 (0.78-1.2)	0.03	0.86	-0.15	0.86 (0.54-1.4)	0.42	0.52	-0.15	0.86 (0.52-1.4)	0.32	0.57	0.086	1.1 (0.63-1.9)	0.1	0.75	0.24	1.3 (0.84-1.9)	1.3	0.26	0.24	1.3 (0.84-1.9)	1.3	0.26
Immunogenic cell death	Autophagy	TNF	-0.28	0.75 (0.52-1.1)	2.2	0.14	-0.46	0.63 (0.33-1.2)	1.8	0.17	-0.23	0.8 (0.3-2.1)	0.21	0.65	-0.2	0.82 (0.29-2.3)	0.15	0.7	-0.36	0.7 (0.28-1.8)	0.58	0.45	-0.36	0.7 (0.28-1.8)	0.58	0.45
Immunogenic cell death	Autophagy	TNFSF10	-0.022	0.98 (0.87-1.1)	0.14	0.71	-0.061	0.94 (0.74-1.2)	0.25	0.62	0.059	1.1 (0.79-1.4)	0.16	0.69	0.057	1.1 (0.8-1.4)	0.16	0.69	0.096	1.1 (0.89-1.4)	0.81	0.37	0.096	1.1 (0.89-1.4)	0.81	0.37
Immunogenic cell death	Autophagy	ULK1	0.31	1.4 (0.94-2)	2.7	0.1	0.12	1.1 (0.52-2.5)	0.1	0.76	-0.39	0.68 (0.3-1.5)	0.91	0.34	0.43	1.5 (0.64-3.7)	0.93	0.34	0.21	1.2 (0.61-2.5)	0.33	0.56	0.21	1.2 (0.61-2.5)	0.33	0.56
Immunogenic cell death	Autophagy	UVRAG	-0.4	0.67 (0.51-0.89)	7.8	0.0052	-0.35	0.71 (0.43-1.2)	1.8	0.18	0.41	1.5 (0.64-3.6)	0.89	0.35	-0.39	0.68 (0.35-1.3)	1.4	0.23	-0.17	0.84 (0.49-1.5)	0.36	0.55	-0.17	0.84 (0.49-1.5)	0.36	0.55
Immunogenic cell death	Necroptosis	CASP8	-0.36	0.7 (0.55-0.88)	9.4	0.0022	-0.51	0.6 (0.39-0.92)	5.4	0.02	-0.029	0.97 (0.57-1.7)	0.01	0.92	-0.19	0.83 (0.48-1.4)	0.45	0.5	-0.35	0.71 (0.44-1.1)	2	0.16	-0.35	0.71 (0.44-1.1)	2	0.16
Immunogenic cell death	Necroptosis	RIPK1	-0.63	0.53 (0.36-0.78)	10	0.0013	-0.41	0.66 (0.34-1.3)	1.4	0.24	-0.4	0.67 (0.27-1.7)	0.76	0.38	-0.67	0.51 (0.2-1.3)	1.9	0.17	-0.97	0.38 (0.17-0.83)	5.8	0.016	-0.97	0.38 (0.17-0.83)	5.8	0.016
Immunogenic cell death	Necrosis	ANXA1	-0.052	0.95 (0.82-1.1)	0.51	0.47	0.25	1.3 (0.94-1.8)	2.4	0.12	-0.026	0.97 (0.6-1.6)	0.01	0.92	0.17	1.2 (0.82-1.7)	0.8	0.37	-0.077	0.93 (0.68-1.3)	0.23	0.63	-0.077	0.93 (0.68-1.3)	0.23	0.63
Immunogenic cell death	Necrosis	HMGB1	-0.018	0.98 (0.78-1.2)	0.02	0.88	0.19	1.2 (0.74-2)	0.56	0.45	-0.26	0.77 (0.43-1.4)	0.78	0.38	0.33	1.4 (0.81-2.4)	1.4	0.23	-0.37	0.69 (0.45-1.1)	2.9	0.088	-0.37	0.69 (0.45-1.1)	2.9	0.088
Metabolic checkpoints	Adenosine Signaling	ADORA1	0.22	1.2 (1-1.5)	5.2	0.022	0.03	1 (0.68-1.6)	0.02	0.89	0.36	1.4 (0.78-2.6)	1.4	0.24	0.27	1.3 (0.91-1.9)	2.2	0.14	0.098	1.1 (0.8-1.5)	0.37	0.54	0.098	1.1 (0.8-1.5)	0.37	0.54
Metabolic checkpoints	Adenosine Signaling	ADORA2B	0.069	1.1 (0.84-1.4)	0.31	0.58	-0.087	0.92 (0.61-1.4)	0.18	0.67	0.061	1.1 (0.52-2.2)	0.03	0.87	0.15	1.2 (0.46-2.9)	0.11	0.74	0.077	1.1 (0.45-2.6)	0.03	0.86	0.077	1.1 (0.45-2.6)	0.03	0.86
Metabolic checkpoints	Adenosine Signaling	ADORA3	-0.045	0.96 (0.65-1.4)	0.06	0.81	-0.6	0.55 (0.24-1.2)	2	0.15	0.37	1.5 (0.54-3.9)	0.55	0.46	0.21	1.2 (0.53-2.9)	0.23	0.63	0.04	1 (0.5-2.2)	0.01	0.92	0.04	1 (0.5-2.2)	0.01	0.92
Metabolic checkpoints	Adenosine Signaling	ENTPD1	-0.49	0.61 (0.48-0.78)	16	7e-05	-0.51	0.6 (0.38-0.96)	4.5	0.034	-0.43	0.65 (0.34-1.3)	1.6	0.2	-0.24	0.79 (0.45-1.4)	0.71	0.4	-0.48	0.62 (0.36-1.1)	3	0.084	-0.48	0.62 (0.36-1.1)	3	0.084
Metabolic checkpoints	Adenosine Signaling	HIF1A	0.25	1.3 (1.1-1.6)	6.1	0.014	0.53	1.7 (0.99-2.9)	3.7	0.056	0.64	1.9 (0.91-4)	2.9	0.089	0.16	1.2 (0.79-1.7)	0.6	0.44	0.26	1.3 (0.91-1.9)	2.2	0.14	0.26	1.3 (0.91-1.9)	2.2	0.14
Metabolic checkpoints	Adenosine Signaling	NT5E	0.14	1.2 (0.87-1.5)	1	0.32	0.37	1.5 (0.97-2.2)	3.4	0.067	-0.13	0.87 (0.4-1.9)	0.11	0.74	0.28	1.3 (0.6-2.9)	0.48	0.49	0.1	1.1 (0.52-2.4)	0.07	0.78	0.1	1.1 (0.52-2.4)	0.07	0.78
Metabolic checkpoints	b-oxidation	ACAA1	-0.25	0.78 (0.63-0.98)	4.7	0.029	0.032	1 (0.65-1.6)	0.02	0.89	-0.039	0.96 (0.58-1.6)	0.02	0.88	-0.54	0.58 (0.32-1)	3.3	0.07	0.19	1.2 (0.73-2)	0.53	0.46	0.19	1.2 (0.73-2)	0.53	0.46
Metabolic checkpoints	b-oxidation	ACAA2	0.18	1.2 (0.94-1.5)	2.2	0.14	0.29	1.3 (0.83-2.2)	1.4	0.24	0.06	1.1 (0.64-1.8)	0.06	0.81	0.14	1.1 (0.66-2)	0.25	0.62	0.27	1.3 (0.8-2.2)	1.1	0.29	0.27	1.3 (0.8-2.2)	1.1	0.29
Metabolic checkpoints	b-oxidation	ACADL	0.045	1 (0.79-1.4)	0.1	0.75	0.32	1.4 (0.84-2.2)	1.6	0.2	0.35	1.4 (0.83-2.4)	1.6	0.2	-0.0066	0.99 (0.44-2.2)	0	0.99	-0.27	0.76 (0.27-2.1)	0.27	0.6	-0.27	0.76 (0.27-2.1)	0.27	0.6
Metabolic checkpoints	b-oxidation	ACADS	-0.078	0.93 (0.61-1.4)	0.14	0.71	0.14	1.2 (0.37-3.7)	0.06	0.81	-0.98	0.38 (0.1-1.4)	2.1	0.15	-0.23	0.8 (0.34-1.9)	0.27	0.6	0.27	1.3 (0.57-3)	0.39	0.53	0.27	1.3 (0.57-3)	0.39	0.53
Metabolic checkpoints	b-oxidation	ACADSB	-0.0049	1 (0.84-1.2)	0	0.95	-0.3	0.74 (0.28-2)	0.35	0.55	0.02	1 (0.58-1.8)	0	0.95	-0.095	0.91 (0.62-1.3)	0.24	0.63	0.18	1.2 (0.9-1.6)	1.5	0.22	0.18	1.2 (0.9-1.6)	1.5	0.22
Metabolic checkpoints	b-oxidation	ACADVL	-0.058	0.94 (0.74-1.2)	0.22	0.64	0.19	1.2 (0.69-2.1)	0.46	0.5	0.26	1.3 (0.64-2.6)	0.52	0.47	0.11	1.1 (0.65-1.9)	0.15	0.7	0.19	1.2 (0.73-2)	0.53	0.47	0.19	1.2 (0.73-2)	0.53	0.47
Metabolic checkpoints	b-oxidation	ACAT1	-0.069	0.93 (0.76-1.1)	0.46	0.5	0.15	1.2 (0.74-1.8)	0.41	0.52	0.089	1.1 (0.64-1.9)	0.1	0.75	0.12	1.1 (0.7-1.8)	0.25	0.62	0.013	1 (0.7-1.5)	0	0.94	0.013	1 (0.7-1.5)	0	0.94
Metabolic checkpoints	b-oxidation	ACOX1	0.14	1.2 (0.91-1.5)	1.4	0.23	-0.39	0.67 (0.38-1.2)	1.8	0.18	0.045	1 (0.66-1.7)	0.04	0.85	-0.2	0.82 (0.42-1.6)	0.32	0.57	0.32	1.4 (0.83-2.3)	1.5	0.22	0.32	1.4 (0.83-2.3)	1.5	0.22
Metabolic checkpoints	b-oxidation	ACOX2	0.08	1.1 (0.98-1.2)	2.5	0.11	-0.16	0.85 (0.57-1.3)	0.63	0.43	0.0024	1 (0.78-1.3)	0	0.99	0.2	1.2 (0.97-1.5)	2.9	0.089	0.11	1.1 (0.94-1.3)	1.5	0.22	0.11	1.1 (0.94-1.3)	1.5	0.22
Metabolic checkpoints	b-oxidation	ACOX3	-0.031	0.97 (0.79-1.2)	0.09	0.76	0.44	1.6 (0.94-2.6)	3	0.084	-0.054	0.95 (0.54-1.6)	0.04	0.85	-0.059	0.94 (0.61-1.5)	0.07	0.79	0.11	1.1 (0.72-1.7)	0.23	0.63	0.11	1.1 (0.72-1.7)	0.23	0.63
Metabolic checkpoints	b-oxidation	CAT	-0.13	0.88 (0.73-1.1)	1.8	0.18	0.15	1.2 (0.81-1.7)	0.64	0.42	-0.11	0.89 (0.54-1.5)	0.19	0.66	0.1	1.1 (0.7-1.7)	0.19	0.67	-0.048	0.95 (0.67-1.4)	0.07	0.79	-0.048	0.95 (0.67-1.4)	0.07	0.79
Metabolic checkpoints	b-oxidation	CAV1	-0.049	0.95 (0.83-1.1)	0.55	0.46	0.33	1.4 (1.1-1.8)	6	0.015	0.16	1.2 (0.8-1.7)	0.64	0.42	0.059	1.1 (0.73-1.5)	0.1	0.76	0.26	1.3 (0.89-1.9)	1.8	0.18	0.26	1.3 (0.89-1.9)	1.8	0.18
Metabolic checkpoints	b-oxidation	CD36	-0.0078	0.99 (0.9-1.1)	0.03	0.87	0.21	1.2 (1-1.5)	5.1	0.024	-0.059	0.94 (0.73-1.2)	0.2	0.66	0.029	1 (0.84-1.3)	0.08	0.78	0.096	1.1 (0.9-1.4)	0.82	0.36	0.096	1.1 (0.9-1.4)	0.82	0.36
Metabolic checkpoints	b-oxidation	CPT1A	0.28	1.3 (1.1-1.6)	6.6	0.01	-0.12	0.88 (0.56-1.4)	0.28	0.6	0.48	1.6 (0.93-2.8)	3	0.086	0.24	1.3 (0.74-2.2)	0.73	0.39	0.17	1.2 (0.8-1.8)	0.73	0.39	0.17	1.2 (0.8-1.8)	0.73	0.39
Metabolic checkpoints	b-oxidation	CPT2	0.48	1.6 (1.2-2.2)	8.6	0.0034	0.45	1.6 (0.74-3.3)	1.4	0.24	0.93	2.5 (1.3-5.1)	6.9	0.0085	0.42	1.5 (0.72-3.2)	1.2	0.27	-0.088	0.92 (0.48-1.8)	0.07	0.79	-0.088	0.92 (0.48-1.8)	0.07	0.79
Metabolic checkpoints	b-oxidation	HADHA	-0.51	0.6 (0.47-0.76)	17	3.3e-05	-0.41	0.66 (0.42-1.1)	3.1	0.08	-0.42	0.66 (0.36-1.2)	1.9	0.17	-0.52	0.6 (0.34-1.1)	3.2	0.074	-0.65	0.52 (0.32-0.86)	6.4	0.011	-0.65	0.52 (0.32-0.86)	6.4	0.011
Metabolic checkpoints	b-oxidation	HSD17B4	-0.014	0.99 (0.83-1.2)	0.02	0.87	0.11	1.1 (0.73-1.7)	0.27	0.6	0.18	1.2 (0.75-1.9)	0.57	0.45	0.11	1.1 (0.68-1.8)	0.19	0.67	0.69	2 (1.2-3.3)	6.7	0.0095	0.69	2 (1.2-3.3)	6.7	0.0095
Metabolic checkpoints	b-oxidation	LPL	-0.095	0.91 (0.81-1)	2.7	0.1	0.11	1.1 (0.92-1.4)	1.2	0.27	-0.21	0.81 (0.56-1.2)	1.1	0.29	-0.088	0.92 (0.7-1.2)	0.4	0.53	0.11	1.1 (0.83-1.5)	0.52	0.47	0.11	1.1 (0.83-1.5)	0.52	0.47
Metabolic checkpoints	b-oxidation	SCP2	-0.15	0.86 (0.69-1.1)	2	0.16	0.043	1 (0.65-1.7)	0.03	0.86	0.016	1 (0.62-1.7)	0	0.95	0.051	1.1 (0.59-1.9)	0.03	0.86	-0.26	0.77 (0.49-1.2)	1.3	0.25	-0.26	0.77 (0.49-1.2)	1.3	0.25
Metabolic checkpoints	ETC	ATP4A	0.26	1.3 (0.69-2.4)	0.65	0.42	0.47	1.6 (0.47-5.5)	0.57	0.45	-1.2	0.31 (0.059-1.7)	1.8	0.18	-0.37	0.69 (0.17-2.9)	0.26	0.61	0.24	1.3 (0.32-5.1)	0.12	0.73	0.24	1.3 (0.32-5.1)	0.12	0.73
Metabolic checkpoints	ETC	ATP6V0A2	0.2	1.2 (0.9-1.7)	1.6	0.2	0.14	1.2 (0.67-2)	0.27	0.61	-0.3	0.74 (0.31-1.8)	0.43	0.51	0.41	1.5 (0.57-4)	0.7	0.4	0.21	1.2 (0.67-2.2)	0.45	0.5	0.21	1.2 (0.67-2.2)	0.45	0.5
Metabolic checkpoints	ETC	COX11	0.16	1.2 (0.97-1.4)	2.6	0.1	0.25	1.3 (0.86-1.9)	1.5	0.22	-0.12	0.88 (0.6-1.3)	0.4	0.53	0.47	1.6 (0.94-2.7)	3	0.083	0.16	1.2 (0.82-1.7)	0.79	0.37	0.16	1.2 (0.82-1.7)	0.79	0.37
Metabolic checkpoints	ETC	COX5A	0.34	1.4 (1.1-1.8)	5.8	0.016	0.25	1.3 (0.72-2.3)	0.74	0.39	0.77	2.1 (1-4.6)	3.8	0.051	-0.028	0.97 (0.52-1.8)	0.01	0.93	-0.14	0.87 (0.47-1.6)	0.2	0.66	-0.14	0.87 (0.47-1.6)	0.2	0.66
Metabolic checkpoints	ETC	COX6B1	0.34	1.4 (0.92-2.1)	2.5	0.11	-0.28	0.76 (0.34-1.7)	0.47	0.49	0.44	1.6 (0.54-4.4)	0.67	0.41	-0.63	0.53 (0.19-1.5)	1.4	0.24	0.66	1.9 (0.86-4.3)	2.5	0.11	0.66	1.9 (0.86-4.3)	2.5	0.11
Metabolic checkpoints	ETC	COX7A2L	0.26	1.3 (0.87-1.9)	1.6	0.21	0.43	1.5 (0.76-3.1)	1.4	0.23	0.75	2.1 (0.76-5.9)	2.1	0.15	-0.21	0.81 (0.29-2.3)	0.17	0.68	-0.32	0.73 (0.33-1.6)	0.63	0.43	-0.32	0.73 (0.33-1.6)	0.63	0.43
Metabolic checkpoints	ETC	COX7B	0.28	1.3 (0.96-1.8)	2.9	0.091	0.28	1.3 (0.7-2.5)	0.76	0.38	0.34	1.4 (0.55-3.6)	0.52	0.47	-0.017	0.98 (0.48-2)	0	0.96	-0.041	0.96 (0.51-1.8)	0.02	0.9	-0.041	0.96 (0.51-1.8)	0.02	0.9
Metabolic checkpoints	ETC	COX8A	0.085	1.1 (0.77-1.5)	0.23	0.63	-0.28	0.75 (0.37-1.5)	0.6	0.44	-0.0089	0.99 (0.41-2.4)	0	0.98	-0.37	0.69 (0.28-1.7)	0.63	0.43	0.038	1 (0.55-1.9)	0.01	0.91	0.038	1 (0.55-1.9)	0.01	0.91
Metabolic checkpoints	ETC	CYC1	0.29	1.3 (1.1-1.6)	7.6	0.0059	-0.23	0.8 (0.52-1.2)	1.2	0.28	0.15	1.2 (0.7-1.9)	0.32	0.57	0.2	1.2 (0.71-2.1)	0.54	0.46	0.081	1.1 (0.74-1.6)	0.18	0.67	0.081	1.1 (0.74-1.6)	0.18	0.67
Metabolic checkpoints	ETC	NDUFA1	0.36	1.4 (0.98-2.1)	3.4	0.067	0.0065	1 (0.48-2.1)	0	0.99	1.1	3 (0.96-9.4)	3.6	0.059	-0.053	0.95 (0.4-2.3)	0.01	0.91	0.12	1.1 (0.55-2.3)	0.11	0.74	0.12	1.1 (0.55-2.3)	0.11	0.74
Metabolic checkpoints	ETC	NDUFA10	-0.41	0.67 (0.51-0.86)	9.5	0.0021	-0.33	0.72 (0.44-1.2)	1.7	0.19	-0.12	0.89 (0.42-1.9)	0.1	0.75	-0.18	0.84 (0.42-1.7)	0.25	0.62	-0.65	0.52 (0.3-0.9)	5.4	0.02	-0.65	0.52 (0.3-0.9)	5.4	0.02
Metabolic checkpoints	ETC	NDUFB2	0.3	1.4 (1-1.8)	4.2	0.039	0.024	1 (0.59-1.8)	0.01	0.93	0.66	1.9 (0.86-4.3)	2.6	0.11	0.33	1.4 (0.72-2.7)	0.96	0.33	-0.1	0.9 (0.5-1.6)	0.12	0.73	-0.1	0.9 (0.5-1.6)	0.12	0.73
Metabolic checkpoints	ETC	NDUFC1	0.19	1.2 (0.85-1.7)	1.1	0.3	-0.23	0.8 (0.38-1.7)	0.37	0.54	0.6	1.8 (0.8-4.2)	2	0.15	-0.011	0.99 (0.38-2.6)	0	0.98	-0.0082	0.99 (0.5-1.9)	0	0.98	-0.0082	0.99 (0.5-1.9)	0	0.98
Metabolic checkpoints	ETC	NDUFV1	0.14	1.1 (0.85-1.5)	0.83	0.36	0.34	1.4 (0.74-2.7)	1.1	0.3	0.38	1.5 (0.73-3)	1.2	0.28	-0.46	0.63 (0.3-1.3)	1.5	0.23	-0.026	0.97 (0.59-1.6)	0.01	0.92	-0.026	0.97 (0.59-1.6)	0.01	0.92
Metabolic checkpoints	ETC	NDUFV2	-0.29	0.75 (0.57-0.98)	4.4	0.036	-0.15	0.86 (0.5-1.5)	0.29	0.59	-0.61	0.54 (0.26-1.1)	2.6	0.1	-1.2	0.29 (0.15-0.57)	13	0.00035	0.2	1.2 (0.72-2.1)	0.56	0.46	0.2	1.2 (0.72-2.1)	0.56	0.46
Metabolic checkpoints	ETC	OXA1L	-0.28	0.76 (0.52-1.1)	2.1	0.15	0.021	1 (0.51-2.1)	0	0.95	0.89	2.4 (0.92-6.4)	3.2	0.074	-1.8	0.16 (0.054-0.47)	11	0.00082	-0.23	0.79 (0.4-1.6)	0.44	0.51	-0.23	0.79 (0.4-1.6)	0.44	0.51
Metabolic checkpoints	ETC	PPA1	-0.17	0.85 (0.63-1.1)	1.2	0.28	-0.27	0.77 (0.43-1.4)	0.82	0.37	0.57	1.8 (0.75-4.2)	1.7	0.2	-0.45	0.64 (0.29-1.4)	1.3	0.26	-0.8	0.45 (0.25-0.81)	7.2	0.0073	-0.8	0.45 (0.25-0.81)	7.2	0.0073
Metabolic checkpoints	ETC	PPA2	0.017	1 (0.8-1.3)	0.02	0.89	0.05	1.1 (0.62-1.8)	0.03	0.85	0.6	1.8 (0.97-3.4)	3.5	0.062	0.1	1.1 (0.64-1.9)	0.14	0.71	-0.29	0.75 (0.44-1.3)	1.1	0.29	-0.29	0.75 (0.44-1.3)	1.1	0.29
Metabolic checkpoints	ETC	SDHA	0.14	1.2 (0.79-1.7)	0.56	0.45	-0.0039	1 (0.49-2)	0	0.99	0.31	1.4 (0.66-2.8)	0.7	0.4	-0.98	0.37 (0.14-0.99)	3.9	0.048	-0.044	0.96 (0.44-2.1)	0.01	0.91	-0.044	0.96 (0.44-2.1)	0.01	0.91
Metabolic checkpoints	ETC	SDHB	-0.094	0.91 (0.7-1.2)	0.51	0.47	-0.24	0.79 (0.48-1.3)	0.89	0.35	-0.012	0.99 (0.49-2)	0	0.97	-0.41	0.67 (0.38-1.2)	2	0.16	-0.35	0.7 (0.42-1.2)	1.8	0.18	-0.35	0.7 (0.42-1.2)	1.8	0.18
Metabolic checkpoints	ETC	UQCR11	0.22	1.3 (0.93-1.7)	2.1	0.14	0.49	1.6 (0.86-3.1)	2.3	0.13	0.84	2.3 (1-5.2)	4.1	0.043	0.15	1.2 (0.53-2.6)	0.15	0.7	-0.32	0.73 (0.39-1.3)	1.1	0.3	-0.32	0.73 (0.39-1.3)	1.1	0.3
Metabolic checkpoints	ETC	UQCRFS1	0.075	1.1 (0.82-1.4)	0.28	0.6	-0.077	0.93 (0.57-1.5)	0.1	0.75	-0.024	0.98 (0.56-1.7)	0.01	0.93	0.27	1.3 (0.59-2.9)	0.44	0.51	-0.18	0.83 (0.45-1.6)	0.32	0.57	-0.18	0.83 (0.45-1.6)	0.32	0.57
Metabolic checkpoints	glycolysis	ALDOA	0.18	1.2 (0.91-1.6)	1.6	0.2	-0.28	0.76 (0.46-1.2)	1.2	0.27	0.14	1.1 (0.46-2.8)	0.09	0.77	-0.19	0.83 (0.41-1.7)	0.28	0.6	0.13	1.1 (0.62-2.1)	0.18	0.67	0.13	1.1 (0.62-2.1)	0.18	0.67
Metabolic checkpoints	glycolysis	ALDOB	-0.76	0.47 (0.28-0.79)	8.1	0.0045	-0.77	0.46 (0.17-1.3)	2.3	0.13	-1.4	0.24 (0.074-0.79)	5.5	0.019	-1.3	0.26 (0.075-0.91)	4.4	0.036	-0.97	0.38 (0.12-1.2)	2.6	0.11	-0.97	0.38 (0.12-1.2)	2.6	0.11
Metabolic checkpoints	glycolysis	ALDOC	0.076	1.1 (0.87-1.3)	0.5	0.48	-0.24	0.79 (0.51-1.2)	1.1	0.29	0.38	1.5 (0.88-2.4)	2.2	0.14	0.16	1.2 (0.61-2.3)	0.24	0.63	-0.27	0.76 (0.51-1.1)	1.7	0.19	-0.27	0.76 (0.51-1.1)	1.7	0.19
Metabolic checkpoints	glycolysis	BPGM	0.16	1.2 (0.91-1.5)	1.6	0.21	0.043	1 (0.65-1.7)	0.03	0.86	0.13	1.1 (0.69-1.9)	0.25	0.62	0.072	1.1 (0.58-2)	0.05	0.82	0.33	1.4 (0.79-2.4)	1.3	0.25	0.33	1.4 (0.79-2.4)	1.3	0.25
Metabolic checkpoints	glycolysis	ENO1	-0.039	0.96 (0.87-1.1)	0.55	0.46	-0.062	0.94 (0.77-1.1)	0.39	0.53	-0.14	0.87 (0.68-1.1)	1.3	0.25	-0.00083	1 (0.76-1.3)	0	1	-0.31	0.73 (0.56-0.96)	5.1	0.024	-0.31	0.73 (0.56-0.96)	5.1	0.024
Metabolic checkpoints	glycolysis	ENO2	0.25	1.3 (1.1-1.4)	15	0.00011	0.24	1.3 (1-1.6)	3.7	0.054	0.4	1.5 (1.1-2)	8.2	0.0042	-0.1	0.9 (0.66-1.2)	0.41	0.52	0.39	1.5 (1.1-1.9)	8.8	0.003	0.39	1.5 (1.1-1.9)	8.8	0.003
Metabolic checkpoints	glycolysis	ENO3	0.19	1.2 (0.8-1.8)	0.83	0.36	-0.16	0.85 (0.34-2.2)	0.11	0.74	-0.09	0.91 (0.25-3.4)	0.02	0.89	0.5	1.7 (0.74-3.7)	1.5	0.22	0.1	1.1 (0.57-2.1)	0.09	0.76	0.1	1.1 (0.57-2.1)	0.09	0.76
Metabolic checkpoints	glycolysis	GPI	0.14	1.2 (0.94-1.4)	1.8	0.17	-0.23	0.79 (0.54-1.2)	1.4	0.23	0.45	1.6 (0.9-2.7)	2.5	0.11	-0.26	0.77 (0.46-1.3)	0.92	0.34	0.36	1.4 (0.9-2.3)	2.3	0.13	0.36	1.4 (0.9-2.3)	2.3	0.13
Metabolic checkpoints	glycolysis	HK2	0.17	1.2 (1-1.4)	3.6	0.056	-0.048	0.95 (0.64-1.4)	0.06	0.81	0.036	1 (0.64-1.7)	0.02	0.88	-0.081	0.92 (0.61-1.4)	0.15	0.7	0.31	1.4 (1-1.9)	3.8	0.053	0.31	1.4 (1-1.9)	3.8	0.053
Metabolic checkpoints	glycolysis	HK3	-0.24	0.79 (0.54-1.2)	1.5	0.22	-0.91	0.4 (0.18-0.91)	4.7	0.029	-1.3	0.28 (0.1-0.75)	6.4	0.011	0.056	1.1 (0.31-3.7)	0.01	0.93	-0.08	0.92 (0.37-2.3)	0.03	0.86	-0.08	0.92 (0.37-2.3)	0.03	0.86
Metabolic checkpoints	glycolysis	PFKL	0.12	1.1 (0.81-1.6)	0.48	0.49	-0.44	0.64 (0.33-1.3)	1.7	0.2	-0.32	0.73 (0.3-1.8)	0.49	0.48	-0.011	0.99 (0.45-2.2)	0	0.98	-0.0039	1 (0.52-1.9)	0	0.99	-0.0039	1 (0.52-1.9)	0	0.99
Metabolic checkpoints	glycolysis	PGAM2	-0.079	0.92 (0.58-1.5)	0.11	0.75	-0.52	0.6 (0.22-1.6)	0.99	0.32	-0.85	0.43 (0.11-1.7)	1.5	0.23	0.089	1.1 (0.36-3.4)	0.02	0.88	-0.31	0.73 (0.32-1.7)	0.54	0.46	-0.31	0.73 (0.32-1.7)	0.54	0.46
Metabolic checkpoints	glycolysis	PGK1	0.045	1 (0.91-1.2)	0.38	0.54	-0.062	0.94 (0.71-1.2)	0.19	0.66	0.043	1 (0.74-1.5)	0.06	0.8	0.0019	1 (0.69-1.5)	0	0.99	-0.33	0.72 (0.52-1)	4	0.047	-0.33	0.72 (0.52-1)	4	0.047
Metabolic checkpoints	glycolysis	PGK2	-0.031	0.97 (0.41-2.3)	0	0.94	0.41	1.5 (0.23-9.7)	0.19	0.67	-1.6	0.2 (0.027-1.4)	2.6	0.11	0.58	1.8 (0.26-12)	0.35	0.56	-0.76	0.47 (0.066-3.3)	0.58	0.45	-0.76	0.47 (0.066-3.3)	0.58	0.45
Metabolic checkpoints	glycolysis	PGM1	0.14	1.1 (0.92-1.4)	1.5	0.22	0.13	1.1 (0.73-1.8)	0.34	0.56	0.34	1.4 (0.8-2.4)	1.4	0.24	0.13	1.1 (0.61-2.1)	0.17	0.68	-0.014	0.99 (0.63-1.5)	0	0.95	-0.014	0.99 (0.63-1.5)	0	0.95
Metabolic checkpoints	glycolysis	PGM3	0.14	1.2 (0.97-1.4)	2.5	0.12	0.21	1.2 (0.95-1.6)	2.4	0.12	0.13	1.1 (0.72-1.8)	0.32	0.57	0.033	1 (0.59-1.8)	0.01	0.91	-0.45	0.64 (0.41-1)	3.7	0.054	-0.45	0.64 (0.41-1)	3.7	0.054
Metabolic checkpoints	glycolysis	TPI1	0.39	1.5 (1.1-1.9)	8	0.0046	0.038	1 (0.62-1.7)	0.02	0.89	0.24	1.3 (0.58-2.8)	0.36	0.55	-0.069	0.93 (0.45-2)	0.03	0.85	0.36	1.4 (0.7-2.9)	0.96	0.33	0.36	1.4 (0.7-2.9)	0.96	0.33
Metabolic checkpoints	Mitochondria	COX10	0.15	1.2 (0.74-1.8)	0.43	0.51	-0.015	0.99 (0.37-2.6)	0	0.98	-0.51	0.6 (0.2-1.8)	0.82	0.36	-0.24	0.79 (0.26-2.3)	0.19	0.66	0.24	1.3 (0.48-3.4)	0.23	0.63	0.24	1.3 (0.48-3.4)	0.23	0.63
Metabolic checkpoints	Mitochondria	CPT2	0.48	1.6 (1.2-2.2)	8.6	0.0034	0.45	1.6 (0.74-3.3)	1.4	0.24	0.93	2.5 (1.3-5.1)	6.9	0.0085	0.42	1.5 (0.72-3.2)	1.2	0.27	-0.088	0.92 (0.48-1.8)	0.07	0.79	-0.088	0.92 (0.48-1.8)	0.07	0.79
Metabolic checkpoints	Mitochondria	HSP90AA1	0.19	1.2 (0.94-1.6)	2.2	0.14	0.12	1.1 (0.66-1.9)	0.19	0.66	0.1	1.1 (0.59-2.1)	0.1	0.75	0.042	1 (0.6-1.8)	0.02	0.88	-0.082	0.92 (0.58-1.5)	0.12	0.73	-0.082	0.92 (0.58-1.5)	0.12	0.73
Metabolic checkpoints	Mitochondria	HSPD1	-0.034	0.97 (0.84-1.1)	0.24	0.62	-0.11	0.89 (0.66-1.2)	0.53	0.46	-0.11	0.9 (0.65-1.2)	0.46	0.5	-0.027	0.97 (0.7-1.4)	0.03	0.87	-0.39	0.68 (0.51-0.89)	7.5	0.006	-0.39	0.68 (0.51-0.89)	7.5	0.006
Metabolic checkpoints	Mitochondria	LRPPRC	0.22	1.3 (0.96-1.6)	2.8	0.091	0.24	1.3 (0.8-2)	1	0.31	0.31	1.4 (0.75-2.5)	1	0.32	0.028	1 (0.55-1.9)	0.01	0.93	-0.036	0.96 (0.5-1.9)	0.01	0.91	-0.036	0.96 (0.5-1.9)	0.01	0.91
Metabolic checkpoints	Mitochondria	MFN1	0.42	1.5 (1.2-1.9)	16	6.7e-05	0.19	1.2 (0.84-1.7)	1	0.31	0.86	2.4 (1.3-4.3)	8	0.0046	0.33	1.4 (0.81-2.4)	1.4	0.23	0.53	1.7 (1-2.8)	4.3	0.038	0.53	1.7 (1-2.8)	4.3	0.038
Metabolic checkpoints	Mitochondria	MIPEP	-0.076	0.93 (0.73-1.2)	0.39	0.53	-0.23	0.8 (0.42-1.5)	0.48	0.49	-0.07	0.93 (0.53-1.6)	0.06	0.81	0.21	1.2 (0.7-2.2)	0.53	0.47	-0.22	0.8 (0.5-1.3)	0.85	0.36	-0.22	0.8 (0.5-1.3)	0.85	0.36
Metabolic checkpoints	Mitochondria	MTX2	0.32	1.4 (1.1-1.8)	5.8	0.016	0.5	1.6 (1-2.7)	4	0.046	0.35	1.4 (0.82-2.5)	1.6	0.21	0.092	1.1 (0.54-2.2)	0.06	0.8	0.15	1.2 (0.67-2)	0.3	0.58	0.15	1.2 (0.67-2)	0.3	0.58
Metabolic checkpoints	Mitochondria	NEFL	-1	0.35 (0.18-0.68)	9.5	0.0021	0.14	1.2 (0.34-3.8)	0.05	0.82	-0.8	0.45 (0.064-3.2)	0.64	0.42	-1.5	0.21 (0.049-0.94)	4.2	0.041	-0.89	0.41 (0.074-2.3)	1	0.31	-0.89	0.41 (0.074-2.3)	1	0.31
Metabolic checkpoints	Mitochondria	OPA1	0.43	1.5 (1.2-1.9)	15	0.00013	0.34	1.4 (0.96-2.1)	3	0.082	0.18	1.2 (0.71-2)	0.45	0.5	0.57	1.8 (1-3.1)	4.1	0.043	0.53	1.7 (1-2.8)	4.3	0.039	0.53	1.7 (1-2.8)	4.3	0.039
Metabolic checkpoints	Mitochondria	PMAIP1	0.029	1 (0.92-1.1)	0.28	0.6	0.14	1.1 (0.92-1.4)	1.4	0.23	0.16	1.2 (0.85-1.6)	0.93	0.34	-0.11	0.89 (0.68-1.2)	0.69	0.41	0.068	1.1 (0.84-1.4)	0.31	0.58	0.068	1.1 (0.84-1.4)	0.31	0.58
Metabolic checkpoints	Mitochondria	RHOT1	0.22	1.2 (1-1.6)	3.8	0.05	0.53	1.7 (1.1-2.7)	5	0.026	0.034	1 (0.62-1.7)	0.02	0.89	-0.064	0.94 (0.54-1.6)	0.05	0.82	0.52	1.7 (1.1-2.6)	5.3	0.021	0.52	1.7 (1.1-2.6)	5.3	0.021
Metabolic checkpoints	Mitochondria	SFN	0.24	1.3 (1.1-1.5)	9.2	0.0024	0.12	1.1 (0.87-1.4)	0.81	0.37	0.54	1.7 (1.2-2.5)	7.4	0.0064	-0.18	0.84 (0.52-1.3)	0.53	0.47	0.3	1.3 (0.92-2)	2.3	0.13	0.3	1.3 (0.92-2)	2.3	0.13
Metabolic checkpoints	Mitochondria	SH3GLB1	-0.25	0.78 (0.6-1)	3.5	0.06	-0.035	0.97 (0.6-1.5)	0.02	0.89	-0.01	0.99 (0.49-2)	0	0.98	-0.79	0.45 (0.23-0.89)	5.3	0.021	-0.29	0.75 (0.46-1.2)	1.2	0.26	-0.29	0.75 (0.46-1.2)	1.2	0.26
Metabolic checkpoints	Mitochondria	SLC25A10	0.12	1.1 (0.85-1.5)	0.67	0.41	-0.17	0.84 (0.46-1.5)	0.32	0.57	-0.0043	1 (0.51-1.9)	0	0.99	-0.95	0.39 (0.18-0.86)	5.5	0.019	0.063	1.1 (0.65-1.8)	0.06	0.81	0.063	1.1 (0.65-1.8)	0.06	0.81
Metabolic checkpoints	Mitochondria	SLC25A3	-0.27	0.77 (0.52-1.1)	1.8	0.19	-0.12	0.89 (0.41-1.9)	0.09	0.76	0.21	1.2 (0.49-3.1)	0.2	0.65	-0.89	0.41 (0.17-1)	3.8	0.051	-0.66	0.52 (0.26-1)	3.5	0.062	-0.66	0.52 (0.26-1)	3.5	0.062
Metabolic checkpoints	Mitochondria	SOD1	0.28	1.3 (0.96-1.8)	2.9	0.09	-0.06	0.94 (0.52-1.7)	0.04	0.84	-0.04	0.96 (0.47-2)	0.01	0.91	0.077	1.1 (0.47-2.5)	0.03	0.85	0.15	1.2 (0.6-2.3)	0.21	0.65	0.15	1.2 (0.6-2.3)	0.21	0.65
Metabolic checkpoints	Mitochondria	STARD3	0.15	1.2 (0.96-1.4)	2.3	0.13	-0.18	0.84 (0.51-1.4)	0.48	0.49	0.033	1 (0.73-1.5)	0.03	0.85	-0.42	0.66 (0.27-1.6)	0.9	0.34	0.1	1.1 (0.67-1.8)	0.16	0.69	0.1	1.1 (0.67-1.8)	0.16	0.69
Metabolic checkpoints	Mitochondria	TAZ	-0.37	0.69 (0.42-1.1)	2.2	0.14	-1.2	0.3 (0.11-0.83)	5.4	0.02	-1.4	0.24 (0.062-0.92)	4.3	0.038	0.28	1.3 (0.43-4.1)	0.23	0.63	0.2	1.2 (0.42-3.6)	0.13	0.71	0.2	1.2 (0.42-3.6)	0.13	0.71
Metabolic checkpoints	Mitochondria	TIMM10	0.3	1.3 (0.99-1.8)	3.7	0.055	0.19	1.2 (0.64-2.3)	0.34	0.56	-0.72	0.49 (0.2-1.2)	2.5	0.11	0.26	1.3 (0.57-2.9)	0.39	0.53	0.14	1.2 (0.69-1.9)	0.29	0.59	0.14	1.2 (0.69-1.9)	0.29	0.59
Metabolic checkpoints	Mitochondria	TIMM10B	-0.19	0.82 (0.59-1.2)	1.2	0.27	-0.4	0.67 (0.32-1.4)	1.1	0.3	-0.16	0.85 (0.38-1.9)	0.15	0.7	0.1	1.1 (0.51-2.4)	0.07	0.79	-0.26	0.77 (0.4-1.5)	0.6	0.44	-0.26	0.77 (0.4-1.5)	0.6	0.44
Metabolic checkpoints	Mitochondria	TIMM8A	0.44	1.5 (0.92-2.6)	2.7	0.1	0.053	1.1 (0.4-2.8)	0.01	0.91	1.1	3.1 (0.59-16)	1.8	0.18	0.42	1.5 (0.32-7.1)	0.28	0.6	-0.96	0.38 (0.11-1.4)	2.1	0.14	-0.96	0.38 (0.11-1.4)	2.1	0.14
Metabolic checkpoints	Mitochondria	TOMM40	0.014	1 (0.71-1.5)	0.01	0.94	-0.62	0.54 (0.25-1.2)	2.5	0.12	-0.6	0.55 (0.2-1.5)	1.3	0.25	-0.62	0.54 (0.22-1.3)	2	0.16	0.46	1.6 (0.73-3.4)	1.4	0.25	0.46	1.6 (0.73-3.4)	1.4	0.25
Metabolic checkpoints	Mitochondria	TSPO	0.099	1.1 (0.85-1.4)	0.54	0.46	0.17	1.2 (0.72-2)	0.46	0.5	0.6	1.8 (0.86-3.9)	2.4	0.12	-0.57	0.57 (0.3-1.1)	2.9	0.086	-0.29	0.74 (0.43-1.3)	1.1	0.3	-0.29	0.74 (0.43-1.3)	1.1	0.3
Metabolic checkpoints	Mitochondria	UCP1	-0.49	0.61 (0.4-0.93)	5.2	0.022	-1.3	0.27 (0.086-0.86)	4.9	0.026	-0.87	0.42 (0.12-1.5)	1.8	0.17	-0.32	0.72 (0.36-1.5)	0.81	0.37	-0.019	0.98 (0.53-1.8)	0	0.95	-0.019	0.98 (0.53-1.8)	0	0.95
Metabolic checkpoints	Mitochondria	UCP2	-0.061	0.94 (0.8-1.1)	0.58	0.45	-0.25	0.78 (0.57-1.1)	2.3	0.13	-0.3	0.74 (0.45-1.2)	1.4	0.23	0.025	1 (0.71-1.5)	0.02	0.9	-0.00028	1 (0.74-1.3)	0	1	-0.00028	1 (0.74-1.3)	0	1
Stromal cells and their products	endothelial cells	ACTA2	0.077	1.1 (0.92-1.3)	0.94	0.33	0.29	1.3 (1-1.8)	4	0.047	0.41	1.5 (0.89-2.5)	2.3	0.13	0.15	1.2 (0.77-1.8)	0.51	0.48	0.31	1.4 (0.94-2)	2.6	0.11	0.31	1.4 (0.94-2)	2.6	0.11
Stromal cells and their products	endothelial cells	EDNRA	0.12	1.1 (0.99-1.3)	3	0.081	0.38	1.5 (1.1-1.9)	8.2	0.0042	0.44	1.5 (1.1-2.2)	5.8	0.016	0.14	1.2 (0.83-1.6)	0.75	0.39	0.29	1.3 (0.99-1.8)	3.5	0.06	0.29	1.3 (0.99-1.8)	3.5	0.06
Stromal cells and their products	endothelial cells	EDNRB	-0.7	0.5 (0.34-0.73)	12	0.00041	-0.17	0.84 (0.35-2)	0.14	0.71	-0.45	0.64 (0.18-2.3)	0.49	0.48	0.079	1.1 (0.43-2.7)	0.03	0.87	-0.29	0.75 (0.29-1.9)	0.35	0.56	-0.29	0.75 (0.29-1.9)	0.35	0.56
Stromal cells and their products	endothelial cells	FASLG	-0.67	0.51 (0.34-0.77)	10	0.0015	-1.8	0.16 (0.063-0.42)	14	0.00016	-1.3	0.26 (0.087-0.81)	5.5	0.019	0.071	1.1 (0.4-2.9)	0.02	0.89	-0.79	0.45 (0.17-1.2)	2.6	0.11	-0.79	0.45 (0.17-1.2)	2.6	0.11
Stromal cells and their products	endothelial cells	FGFR1	0.043	1 (0.89-1.2)	0.29	0.59	0.071	1.1 (0.79-1.5)	0.21	0.65	0.43	1.5 (0.94-2.5)	2.9	0.086	0.12	1.1 (0.78-1.6)	0.42	0.52	-0.003	1 (0.79-1.3)	0	0.98	-0.003	1 (0.79-1.3)	0	0.98
Stromal cells and their products	endothelial cells	FGFR2	-0.036	0.96 (0.86-1.1)	0.34	0.56	0.021	1 (0.86-1.2)	0.06	0.81	0.024	1 (0.65-1.6)	0.01	0.92	-0.16	0.85 (0.62-1.2)	0.91	0.34	0.21	1.2 (0.98-1.6)	3.3	0.07	0.21	1.2 (0.98-1.6)	3.3	0.07
Stromal cells and their products	endothelial cells	FGFR3	0.061	1.1 (0.96-1.2)	1.3	0.25	-0.053	0.95 (0.74-1.2)	0.17	0.68	-0.18	0.83 (0.58-1.2)	1	0.32	0.042	1 (0.81-1.3)	0.11	0.74	0.12	1.1 (0.93-1.4)	1.6	0.21	0.12	1.1 (0.93-1.4)	1.6	0.21
Stromal cells and their products	endothelial cells	FGFR4	0.12	1.1 (0.95-1.3)	2	0.15	0.38	1.5 (0.89-2.4)	2.2	0.13	-0.15	0.86 (0.62-1.2)	0.79	0.37	0.24	1.3 (0.74-2.2)	0.73	0.39	0.01	1 (0.69-1.5)	0	0.96	0.01	1 (0.69-1.5)	0	0.96
Stromal cells and their products	endothelial cells	FLT1	0.028	1 (0.74-1.4)	0.03	0.87	0.52	1.7 (0.86-3.3)	2.3	0.13	0.32	1.4 (0.54-3.5)	0.45	0.5	-0.15	0.86 (0.4-1.9)	0.15	0.7	0.79	2.2 (1.1-4.2)	5.5	0.019	0.79	2.2 (1.1-4.2)	5.5	0.019
Stromal cells and their products	endothelial cells	FLT4	0.26	1.3 (0.55-3.1)	0.35	0.55	0.77	2.2 (0.4-12)	0.8	0.37	0.86	2.4 (0.34-16)	0.76	0.38	0.38	1.5 (0.2-10)	0.14	0.71	0.36	1.4 (0.22-9.3)	0.14	0.71	0.36	1.4 (0.22-9.3)	0.14	0.71
Stromal cells and their products	endothelial cells	KDR	-0.025	0.98 (0.69-1.4)	0.02	0.89	0.49	1.6 (0.86-3.1)	2.2	0.13	0.19	1.2 (0.5-2.9)	0.17	0.68	-0.39	0.67 (0.3-1.5)	0.88	0.35	0.77	2.2 (1.1-4.1)	5.3	0.021	0.77	2.2 (1.1-4.1)	5.3	0.021
Stromal cells and their products	endothelial cells	TNFSF10	-0.022	0.98 (0.87-1.1)	0.14	0.71	-0.061	0.94 (0.74-1.2)	0.25	0.62	0.059	1.1 (0.79-1.4)	0.16	0.69	0.057	1.1 (0.8-1.4)	0.16	0.69	0.096	1.1 (0.89-1.4)	0.81	0.37	0.096	1.1 (0.89-1.4)	0.81	0.37
Stromal cells and their products	Fibroblasts	COL10A1	0.11	1.1 (1-1.2)	6.7	0.0095	0.25	1.3 (1.1-1.5)	7.4	0.0064	0.39	1.5 (1.1-1.9)	8.6	0.0035	0.073	1.1 (0.89-1.3)	0.58	0.45	0.15	1.2 (0.97-1.4)	2.6	0.11	0.15	1.2 (0.97-1.4)	2.6	0.11
Stromal cells and their products	Fibroblasts	COL11A1	0.11	1.1 (1-1.2)	9.6	0.002	0.23	1.3 (1.1-1.5)	7.6	0.006	0.26	1.3 (1-1.6)	4.8	0.028	0.021	1 (0.89-1.2)	0.09	0.76	0.13	1.1 (0.97-1.3)	2.5	0.11	0.13	1.1 (0.97-1.3)	2.5	0.11
Stromal cells and their products	Fibroblasts	COL1A1	0.06	1.1 (0.97-1.2)	1.7	0.19	0.15	1.2 (0.96-1.4)	2.5	0.12	0.35	1.4 (1-2)	4.4	0.037	0.14	1.1 (0.93-1.4)	1.6	0.2	0.083	1.1 (0.88-1.3)	0.61	0.44	0.083	1.1 (0.88-1.3)	0.61	0.44
Stromal cells and their products	Fibroblasts	COL3A1	0.11	1.1 (0.95-1.3)	1.8	0.18	0.38	1.5 (1-2.1)	4.9	0.027	0.55	1.7 (0.98-3.1)	3.5	0.06	0.36	1.4 (0.95-2.2)	3	0.083	0.15	1.2 (0.83-1.6)	0.77	0.38	0.15	1.2 (0.83-1.6)	0.77	0.38
Stromal cells and their products	Fibroblasts	COL4A4	-0.3	0.74 (0.41-1.3)	1	0.32	-0.3	0.74 (0.23-2.4)	0.26	0.61	-0.48	0.62 (0.12-3.2)	0.33	0.56	-0.38	0.68 (0.18-2.5)	0.33	0.57	-0.25	0.78 (0.21-2.9)	0.15	0.7	-0.25	0.78 (0.21-2.9)	0.15	0.7
Stromal cells and their products	Fibroblasts	COL5A2	0.074	1.1 (0.98-1.2)	2.3	0.13	0.22	1.2 (1-1.5)	4.1	0.042	0.25	1.3 (0.95-1.7)	2.6	0.11	0.11	1.1 (0.9-1.4)	0.96	0.33	0.13	1.1 (0.91-1.4)	1.3	0.25	0.13	1.1 (0.91-1.4)	1.3	0.25
Stromal cells and their products	Fibroblasts	FN1	-0.052	0.95 (0.79-1.1)	0.33	0.56	-0.18	0.84 (0.56-1.2)	0.74	0.39	-0.19	0.83 (0.54-1.3)	0.73	0.39	0.081	1.1 (0.73-1.6)	0.16	0.69	-0.23	0.79 (0.49-1.3)	0.9	0.34	-0.23	0.79 (0.49-1.3)	0.9	0.34
Stromal cells and their products	Fibroblasts	ITGA7	-0.028	0.97 (0.72-1.3)	0.03	0.85	0.65	1.9 (1.1-3.4)	4.7	0.03	0.52	1.7 (0.72-4)	1.4	0.23	-0.46	0.63 (0.29-1.4)	1.3	0.25	0.9	2.5 (1.1-5.8)	4.3	0.038	0.9	2.5 (1.1-5.8)	4.3	0.038
Stromal cells and their products	Fibroblasts	LAMB1	0.13	1.1 (1-1.3)	3.8	0.051	0.29	1.3 (1.1-1.7)	6.4	0.011	0.29	1.3 (0.94-1.9)	2.5	0.11	0.29	1.3 (0.98-1.8)	3.3	0.068	0.28	1.3 (0.98-1.8)	3.4	0.063	0.28	1.3 (0.98-1.8)	3.4	0.063
Stromal cells and their products	Fibroblasts	LAMB2	-0.067	0.93 (0.79-1.1)	0.66	0.42	0.62	1.9 (1.2-2.9)	7.4	0.0064	0.23	1.3 (0.77-2.1)	0.86	0.35	-0.23	0.79 (0.5-1.3)	0.97	0.33	0.063	1.1 (0.73-1.6)	0.11	0.74	0.063	1.1 (0.73-1.6)	0.11	0.74
Stromal cells and their products	Fibroblasts	LAMB3	-0.012	0.99 (0.85-1.2)	0.02	0.88	0.13	1.1 (0.88-1.5)	1	0.32	0.54	1.7 (1-2.9)	4.2	0.042	0.19	1.2 (0.79-1.9)	0.77	0.38	-0.48	0.62 (0.33-1.1)	2.3	0.13	-0.48	0.62 (0.33-1.1)	2.3	0.13
Stromal cells and their products	Fibroblasts	NOS2	-0.46	0.63 (0.33-1.2)	1.9	0.17	-0.59	0.55 (0.14-2.1)	0.73	0.39	-1.4	0.25 (0.058-1.1)	3.3	0.069	-0.95	0.39 (0.097-1.5)	1.8	0.18	-0.66	0.51 (0.11-2.3)	0.75	0.39	-0.66	0.51 (0.11-2.3)	0.75	0.39
Stromal cells and their products	Fibroblasts	NOS3	-0.096	0.91 (0.57-1.4)	0.17	0.68	-0.34	0.71 (0.32-1.6)	0.69	0.41	-1.1	0.33 (0.071-1.5)	2	0.15	0.16	1.2 (0.38-3.6)	0.08	0.78	0.25	1.3 (0.44-3.8)	0.21	0.65	0.25	1.3 (0.44-3.8)	0.21	0.65
Stromal cells and their products	Fibroblasts	PDGFRA	-0.01	0.99 (0.88-1.1)	0.03	0.87	0.29	1.3 (1-1.7)	5.2	0.022	0.089	1.1 (0.75-1.6)	0.21	0.64	0.17	1.2 (0.88-1.6)	1.3	0.26	0.11	1.1 (0.83-1.5)	0.52	0.47	0.11	1.1 (0.83-1.5)	0.52	0.47
Stromal cells and their products	Fibroblasts	PDPN	0.11	1.1 (0.88-1.4)	0.87	0.35	0.42	1.5 (0.98-2.4)	3.6	0.059	0.064	1.1 (0.55-2.1)	0.04	0.85	0.37	1.5 (0.85-2.5)	1.9	0.17	0.11	1.1 (0.66-1.9)	0.17	0.68	0.11	1.1 (0.66-1.9)	0.17	0.68
Stromal cells and their products	Fibroblasts	SQSTM1	0.2	1.2 (0.93-1.6)	2.1	0.15	-0.19	0.83 (0.5-1.4)	0.51	0.48	0.58	1.8 (0.98-3.2)	3.6	0.057	0.051	1.1 (0.53-2.1)	0.02	0.88	0.31	1.4 (0.82-2.3)	1.5	0.23	0.31	1.4 (0.82-2.3)	1.5	0.23
Stromal cells and their products	Fibroblasts	TNC	0.057	1.1 (0.96-1.2)	1.2	0.27	0.16	1.2 (0.98-1.4)	2.9	0.088	0.35	1.4 (1-1.9)	5.1	0.024	0.13	1.1 (0.91-1.4)	1.3	0.26	-0.0051	0.99 (0.79-1.2)	0	0.97	-0.0051	0.99 (0.79-1.2)	0	0.97
Stromal cells and their products	Fibroblasts	VIM	-0.2	0.82 (0.66-1)	3.5	0.061	0.25	1.3 (0.77-2.2)	0.9	0.34	-0.11	0.9 (0.47-1.7)	0.1	0.75	0.13	1.1 (0.67-1.9)	0.23	0.63	-0.27	0.77 (0.5-1.2)	1.5	0.22	-0.27	0.77 (0.5-1.2)	1.5	0.22
Stromal cells and their products	TME mediators	EDN1	0.12	1.1 (0.88-1.4)	0.86	0.35	0.53	1.7 (1.1-2.5)	6.4	0.011	-0.4	0.67 (0.35-1.3)	1.4	0.23	-0.14	0.87 (0.45-1.7)	0.17	0.68	-0.0067	0.99 (0.51-1.9)	0	0.98	-0.0067	0.99 (0.51-1.9)	0	0.98
Stromal cells and their products	TME mediators	EDN2	0.25	1.3 (0.92-1.8)	2.2	0.14	0.36	1.4 (0.91-2.3)	2.4	0.12	0.35	1.4 (0.54-3.7)	0.5	0.48	-0.075	0.93 (0.33-2.6)	0.02	0.89	0.051	1.1 (0.38-2.9)	0.01	0.92	0.051	1.1 (0.38-2.9)	0.01	0.92
Stromal cells and their products	TME mediators	EDN3	-0.29	0.75 (0.55-1)	3.4	0.064	-0.12	0.89 (0.58-1.4)	0.32	0.57	-2.4	0.095 (0.019-0.49)	7.9	0.0048	-0.18	0.83 (0.27-2.6)	0.1	0.75	1	2.7 (0.73-10)	2.2	0.13	1	2.7 (0.73-10)	2.2	0.13
Stromal cells and their products	TME mediators	FGF2	-0.2	0.82 (0.55-1.2)	0.95	0.33	-0.15	0.86 (0.47-1.6)	0.21	0.64	-0.24	0.78 (0.2-3)	0.12	0.72	0.053	1.1 (0.43-2.6)	0.01	0.91	0.57	1.8 (0.56-5.6)	0.95	0.33	0.57	1.8 (0.56-5.6)	0.95	0.33
Stromal cells and their products	TME mediators	IDO1	-0.16	0.85 (0.74-0.98)	4.9	0.027	-0.33	0.72 (0.57-0.91)	7.7	0.0056	-0.44	0.64 (0.41-1)	3.8	0.052	0.13	1.1 (0.63-2)	0.18	0.67	-0.59	0.55 (0.36-0.85)	7.3	0.0067	-0.59	0.55 (0.36-0.85)	7.3	0.0067
Stromal cells and their products	TME mediators	IL10	0.47	1.6 (0.75-3.4)	1.5	0.22	0.64	1.9 (0.45-8.2)	0.76	0.38	-0.51	0.6 (0.095-3.8)	0.3	0.59	0.41	1.5 (0.23-9.9)	0.19	0.67	0.048	1 (0.2-5.6)	0	0.96	0.048	1 (0.2-5.6)	0	0.96
Stromal cells and their products	TME mediators	IL6	-0.016	0.98 (0.74-1.3)	0.01	0.91	0.75	2.1 (1.2-3.6)	7.7	0.0056	-0.41	0.66 (0.25-1.7)	0.7	0.4	0.13	1.1 (0.52-2.5)	0.11	0.74	-0.11	0.9 (0.45-1.8)	0.09	0.76	-0.11	0.9 (0.45-1.8)	0.09	0.76
Stromal cells and their products	TME mediators	MIF	0.15	1.2 (0.88-1.5)	1.1	0.29	0.14	1.1 (0.66-2)	0.25	0.62	0.11	1.1 (0.47-2.7)	0.06	0.81	0.036	1 (0.58-1.9)	0.01	0.9	-0.38	0.68 (0.39-1.2)	1.8	0.18	-0.38	0.68 (0.39-1.2)	1.8	0.18
Stromal cells and their products	TME mediators	PTGES	0.22	1.2 (1.1-1.5)	7.3	0.0069	0.39	1.5 (0.98-2.2)	3.4	0.063	0.051	1.1 (0.6-1.9)	0.03	0.86	0.13	1.1 (0.8-1.6)	0.51	0.47	0.25	1.3 (0.99-1.7)	3.5	0.06	0.25	1.3 (0.99-1.7)	3.5	0.06
Stromal cells and their products	TME mediators	PTGES2	-0.16	0.85 (0.57-1.3)	0.58	0.45	-0.29	0.75 (0.32-1.7)	0.46	0.5	-0.98	0.38 (0.14-1)	3.8	0.053	-1.1	0.32 (0.13-0.78)	6.3	0.012	-0.24	0.79 (0.34-1.8)	0.31	0.58	-0.24	0.79 (0.34-1.8)	0.31	0.58
Stromal cells and their products	TME mediators	PTGES3	0.39	1.5 (0.99-2.2)	3.6	0.058	0.42	1.5 (0.72-3.3)	1.2	0.27	0.061	1.1 (0.41-2.7)	0.02	0.9	0.54	1.7 (0.59-5)	0.97	0.32	0.073	1.1 (0.44-2.6)	0.03	0.87	0.073	1.1 (0.44-2.6)	0.03	0.87
Stromal cells and their products	TME mediators	TGFB1	-0.17	0.84 (0.7-1)	3.3	0.07	-0.3	0.74 (0.5-1.1)	2.2	0.14	-0.38	0.68 (0.41-1.2)	2	0.15	0.0028	1 (0.65-1.5)	0	0.99	-0.14	0.87 (0.56-1.3)	0.41	0.52	-0.14	0.87 (0.56-1.3)	0.41	0.52
Stromal cells and their products	TME mediators	TGFB2	-0.28	0.76 (0.56-1)	3.3	0.07	-0.031	0.97 (0.56-1.7)	0.01	0.91	-0.19	0.82 (0.39-1.7)	0.26	0.61	-0.18	0.84 (0.43-1.6)	0.28	0.6	-0.71	0.49 (0.2-1.2)	2.5	0.11	-0.71	0.49 (0.2-1.2)	2.5	0.11
Stromal cells and their products	TME mediators	TGFB3	-0.3	0.74 (0.61-0.91)	8.4	0.0037	-0.085	0.92 (0.51-1.6)	0.08	0.78	-0.14	0.87 (0.44-1.7)	0.15	0.69	0.016	1 (0.6-1.7)	0	0.95	-0.39	0.68 (0.36-1.3)	1.5	0.22	-0.39	0.68 (0.36-1.3)	1.5	0.22
Stromal cells and their products	TME mediators	TNF	-0.28	0.75 (0.52-1.1)	2.2	0.14	-0.46	0.63 (0.33-1.2)	1.8	0.17	-0.23	0.8 (0.3-2.1)	0.21	0.65	-0.2	0.82 (0.29-2.3)	0.15	0.7	-0.36	0.7 (0.28-1.8)	0.58	0.45	-0.36	0.7 (0.28-1.8)	0.58	0.45
Stromal cells and their products	TME mediators	VEGFA	0.24	1.3 (1.1-1.5)	9.8	0.0017	0.32	1.4 (1-1.8)	4.9	0.027	0.22	1.2 (0.83-1.9)	1.1	0.3	-0.034	0.97 (0.65-1.4)	0.03	0.87	0.22	1.3 (0.9-1.7)	1.8	0.18	0.22	1.3 (0.9-1.7)	1.8	0.18
Stromal cells and their products	TME mediators	VEGFB	-0.13	0.88 (0.65-1.2)	0.75	0.39	-0.071	0.93 (0.48-1.8)	0.04	0.84	-0.072	0.93 (0.43-2)	0.03	0.85	-0.37	0.69 (0.37-1.3)	1.3	0.25	0.12	1.1 (0.61-2.1)	0.15	0.7	0.12	1.1 (0.61-2.1)	0.15	0.7
Stromal cells and their products	TME mediators	VEGFC	0.11	1.1 (0.88-1.4)	0.88	0.35	0.32	1.4 (0.85-2.2)	1.7	0.19	0.33	1.4 (0.76-2.5)	1.1	0.28	0.097	1.1 (0.61-2)	0.1	0.75	0.45	1.6 (0.99-2.5)	3.7	0.053	0.45	1.6 (0.99-2.5)	3.7	0.053
T cell recruitment	Adhesion molecules	ANXA2	0.24	1.3 (0.87-1.9)	1.5	0.21	0.52	1.7 (0.85-3.3)	2.2	0.13	0.86	2.4 (1-5.6)	3.8	0.05	0.037	1 (0.39-2.8)	0.01	0.94	-0.096	0.91 (0.45-1.8)	0.07	0.79	-0.096	0.91 (0.45-1.8)	0.07	0.79
T cell recruitment	Adhesion molecules	ANXA5	-4.7e-05	1 (0.73-1.4)	0	1	-0.045	0.96 (0.52-1.8)	0.02	0.89	0.84	2.3 (1-5.3)	3.8	0.05	0.09	1.1 (0.51-2.3)	0.05	0.82	0.098	1.1 (0.59-2.1)	0.09	0.76	0.098	1.1 (0.59-2.1)	0.09	0.76
T cell recruitment	Adhesion molecules	CD63	0.057	1.1 (0.67-1.7)	0.06	0.81	-0.2	0.82 (0.38-1.8)	0.27	0.61	0.24	1.3 (0.35-4.6)	0.14	0.71	0.6	1.8 (0.52-6.4)	0.9	0.34	0.52	1.7 (0.55-5.2)	0.84	0.36	0.52	1.7 (0.55-5.2)	0.84	0.36
T cell recruitment	Adhesion molecules	CD81	-0.17	0.84 (0.59-1.2)	0.88	0.35	-0.06	0.94 (0.43-2.1)	0.02	0.88	0.12	1.1 (0.48-2.6)	0.08	0.78	0.37	1.4 (0.6-3.5)	0.67	0.41	-0.69	0.5 (0.26-0.96)	4.3	0.038	-0.69	0.5 (0.26-0.96)	4.3	0.038
T cell recruitment	Adhesion molecules	EFNB1	-0.68	0.5 (0.3-0.85)	6.7	0.0096	-0.88	0.42 (0.15-1.1)	2.9	0.087	-1.4	0.26 (0.059-1.1)	3.2	0.073	-0.74	0.48 (0.15-1.5)	1.6	0.21	-0.69	0.5 (0.15-1.6)	1.3	0.25	-0.69	0.5 (0.15-1.6)	1.3	0.25
T cell recruitment	Adhesion molecules	EFNB2	-0.015	0.99 (0.86-1.1)	0.04	0.83	-0.0055	0.99 (0.76-1.3)	0	0.97	0.095	1.1 (0.79-1.5)	0.31	0.58	-0.095	0.91 (0.62-1.3)	0.24	0.62	0.23	1.3 (0.97-1.6)	3	0.083	0.23	1.3 (0.97-1.6)	3	0.083
T cell recruitment	Adhesion molecules	EFNB3	0.0029	1 (0.7-1.4)	0	0.99	0.32	1.4 (0.68-2.8)	0.79	0.37	-0.1	0.9 (0.33-2.4)	0.04	0.84	0.38	1.5 (0.65-3.3)	0.83	0.36	-0.14	0.87 (0.45-1.7)	0.18	0.68	-0.14	0.87 (0.45-1.7)	0.18	0.68
T cell recruitment	Adhesion molecules	ICAM1	-0.22	0.8 (0.67-0.96)	6.1	0.014	-0.18	0.84 (0.64-1.1)	1.8	0.19	-0.45	0.64 (0.36-1.1)	2.5	0.11	-0.49	0.61 (0.36-1.1)	3.1	0.076	-0.16	0.86 (0.54-1.3)	0.45	0.5	-0.16	0.86 (0.54-1.3)	0.45	0.5
T cell recruitment	Adhesion molecules	ICAM2	-0.5	0.6 (0.46-0.79)	13	0.00029	-0.44	0.65 (0.4-1)	3.3	0.071	-1	0.35 (0.17-0.73)	7.8	0.0052	-0.28	0.75 (0.34-1.7)	0.49	0.48	-0.47	0.62 (0.32-1.2)	1.9	0.17	-0.47	0.62 (0.32-1.2)	1.9	0.17
T cell recruitment	Adhesion molecules	LGALS1	0.16	1.2 (0.94-1.5)	2	0.16	0.21	1.2 (0.83-1.8)	1.1	0.3	0.79	2.2 (1.1-4.5)	4.6	0.033	0.084	1.1 (0.67-1.8)	0.11	0.74	-0.0084	0.99 (0.64-1.5)	0	0.97	-0.0084	0.99 (0.64-1.5)	0	0.97
T cell recruitment	Adhesion molecules	LGALS3	-0.062	0.94 (0.76-1.2)	0.31	0.58	0.22	1.2 (0.78-2)	0.84	0.36	0.33	1.4 (0.64-3)	0.68	0.41	0.3	1.3 (0.79-2.3)	1.2	0.28	-0.21	0.81 (0.55-1.2)	1.2	0.28	-0.21	0.81 (0.55-1.2)	1.2	0.28
T cell recruitment	Adhesion molecules	PECAM1	-0.083	0.92 (0.77-1.1)	0.8	0.37	0.15	1.2 (0.8-1.7)	0.61	0.43	-0.32	0.73 (0.44-1.2)	1.6	0.21	0.22	1.2 (0.81-1.9)	1	0.32	0.14	1.1 (0.73-1.8)	0.37	0.54	0.14	1.1 (0.73-1.8)	0.37	0.54
T cell recruitment	Adhesion molecules	VCAM1	-0.12	0.88 (0.78-1)	3.9	0.049	-0.14	0.87 (0.7-1.1)	1.4	0.24	-0.29	0.75 (0.51-1.1)	2.2	0.14	-0.091	0.91 (0.65-1.3)	0.26	0.61	-0.16	0.86 (0.64-1.1)	1.1	0.29	-0.16	0.86 (0.64-1.1)	1.1	0.29
T cell recruitment	Chemoattractants	CCL1	0.13	1.1 (0.61-2.1)	0.17	0.68	0.11	1.1 (0.3-4.2)	0.02	0.87	0.17	1.2 (0.21-6.8)	0.03	0.85	-0.18	0.83 (0.22-3.2)	0.07	0.79	-0.42	0.66 (0.19-2.2)	0.45	0.5	-0.42	0.66 (0.19-2.2)	0.45	0.5
T cell recruitment	Chemoattractants	CCL2	-0.16	0.86 (0.75-0.98)	4.9	0.027	-0.096	0.91 (0.7-1.2)	0.55	0.46	-0.47	0.62 (0.43-0.92)	5.8	0.016	-0.051	0.95 (0.66-1.4)	0.07	0.79	-0.24	0.79 (0.58-1.1)	2.2	0.14	-0.24	0.79 (0.58-1.1)	2.2	0.14
T cell recruitment	Chemoattractants	CCL4	-0.31	0.73 (0.6-0.88)	11	0.0012	-0.5	0.61 (0.42-0.89)	6.7	0.0096	-0.18	0.84 (0.51-1.4)	0.52	0.47	-0.17	0.84 (0.53-1.3)	0.55	0.46	-0.6	0.55 (0.34-0.87)	6.4	0.011	-0.6	0.55 (0.34-0.87)	6.4	0.011
T cell recruitment	Chemoattractants	CCL5	-0.12	0.89 (0.8-0.99)	4.4	0.035	-0.22	0.8 (0.65-0.98)	4.7	0.031	-0.23	0.79 (0.61-1)	3.2	0.073	0.12	1.1 (0.84-1.5)	0.61	0.44	-0.25	0.78 (0.61-0.99)	4.2	0.041	-0.25	0.78 (0.61-0.99)	4.2	0.041
T cell recruitment	Chemoattractants	CCL7	-0.24	0.79 (0.52-1.2)	1.3	0.25	-0.58	0.56 (0.29-1.1)	3.2	0.074	-1.5	0.21 (0.053-0.86)	4.7	0.03	0.3	1.3 (0.24-7.5)	0.11	0.73	-0.2	0.82 (0.24-2.8)	0.1	0.75	-0.2	0.82 (0.24-2.8)	0.1	0.75
T cell recruitment	Chemoattractants	CXCL10	-0.029	0.97 (0.89-1.1)	0.41	0.52	-0.17	0.84 (0.71-1)	3.6	0.057	-0.24	0.79 (0.61-1)	3.3	0.071	0.041	1 (0.81-1.3)	0.1	0.75	-0.23	0.79 (0.64-0.98)	4.5	0.033	-0.23	0.79 (0.64-0.98)	4.5	0.033
T cell recruitment	Chemoattractants	CXCL11	-0.043	0.96 (0.88-1)	1	0.31	-0.11	0.89 (0.77-1)	2.2	0.14	-0.036	0.96 (0.78-1.2)	0.12	0.73	-0.22	0.81 (0.56-1.2)	1.3	0.25	-0.29	0.75 (0.61-0.92)	7.6	0.0059	-0.29	0.75 (0.61-0.92)	7.6	0.0059
T cell recruitment	Chemoattractants	CXCL13	-0.15	0.86 (0.81-0.92)	22	2.2e-06	-0.22	0.8 (0.7-0.91)	11	0.001	-0.23	0.8 (0.67-0.95)	6.5	0.011	-0.11	0.9 (0.77-1)	2	0.16	-0.15	0.86 (0.76-0.98)	5.4	0.02	-0.15	0.86 (0.76-0.98)	5.4	0.02
T cell recruitment	Chemoattractants	CXCL3	-0.11	0.89 (0.5-1.6)	0.15	0.7	0.31	1.4 (0.58-3.2)	0.5	0.48	-0.65	0.52 (0.063-4.3)	0.36	0.55	-0.54	0.58 (0.097-3.5)	0.35	0.55	0.27	1.3 (0.27-6.4)	0.11	0.73	0.27	1.3 (0.27-6.4)	0.11	0.73
T cell recruitment	Chemoattractants	CXCL9	-0.078	0.93 (0.86-1)	3.9	0.047	-0.25	0.78 (0.67-0.91)	10	0.0015	-0.16	0.85 (0.69-1)	2.3	0.13	0.019	1 (0.83-1.3)	0.03	0.86	-0.19	0.83 (0.7-0.98)	4.9	0.027	-0.19	0.83 (0.7-0.98)	4.9	0.027
T cell recruitment	Chemoattractants	CXCR3	-0.36	0.7 (0.47-1)	3.2	0.073	-1.1	0.33 (0.14-0.8)	6	0.014	-0.22	0.8 (0.32-2)	0.22	0.64	-0.092	0.91 (0.33-2.5)	0.03	0.86	-0.62	0.54 (0.24-1.2)	2.2	0.13	-0.62	0.54 (0.24-1.2)	2.2	0.13
T cell recruitment	Chemoattractants	CXCR5	-0.36	0.7 (0.46-1.1)	2.8	0.092	-0.48	0.62 (0.29-1.3)	1.5	0.23	-0.72	0.49 (0.16-1.5)	1.6	0.21	-0.33	0.72 (0.25-2.1)	0.36	0.55	-0.84	0.43 (0.16-1.2)	2.8	0.094	-0.84	0.43 (0.16-1.2)	2.8	0.094
T cell recruitment	immune effector cells	CD14	-0.11	0.89 (0.76-1.1)	1.7	0.19	-0.062	0.94 (0.68-1.3)	0.15	0.7	-0.3	0.74 (0.47-1.2)	1.7	0.2	0.014	1 (0.67-1.5)	0	0.95	-0.26	0.77 (0.55-1.1)	2.1	0.15	-0.26	0.77 (0.55-1.1)	2.1	0.15
T cell recruitment	immune effector cells	CD74	-0.34	0.71 (0.6-0.84)	16	6.3e-05	-0.31	0.73 (0.56-0.96)	5.1	0.024	-0.57	0.56 (0.36-0.87)	6.6	0.01	-0.064	0.94 (0.6-1.5)	0.08	0.78	-0.43	0.65 (0.47-0.9)	6.7	0.0097	-0.43	0.65 (0.47-0.9)	6.7	0.0097
T cell recruitment	immune effector cells	GZMA	-0.23	0.8 (0.69-0.93)	8.5	0.0035	-0.34	0.71 (0.53-0.95)	5.3	0.022	-0.28	0.76 (0.54-1.1)	2.6	0.11	-0.021	0.98 (0.65-1.5)	0.01	0.92	-0.32	0.72 (0.53-0.99)	4	0.046	-0.32	0.72 (0.53-0.99)	4	0.046
T cell recruitment	immune effector cells	GZMB	-0.19	0.83 (0.72-0.96)	6.6	0.01	-0.32	0.73 (0.57-0.93)	6.6	0.01	-0.42	0.66 (0.45-0.96)	4.8	0.029	0.08	1.1 (0.6-1.9)	0.07	0.79	-0.62	0.54 (0.34-0.84)	7.5	0.0061	-0.62	0.54 (0.34-0.84)	7.5	0.0061
T cell recruitment	immune effector cells	GZMH	-0.51	0.6 (0.44-0.81)	11	0.00089	-0.77	0.46 (0.26-0.81)	7.4	0.0066	-0.59	0.56 (0.29-1.1)	3.1	0.078	-0.76	0.47 (0.19-1.1)	2.8	0.094	-0.62	0.54 (0.28-1.1)	3.3	0.071	-0.62	0.54 (0.28-1.1)	3.3	0.071
T cell recruitment	immune effector cells	GZMK	-0.25	0.78 (0.68-0.9)	12	0.00051	-0.32	0.72 (0.54-0.97)	4.6	0.033	-0.25	0.78 (0.57-1.1)	2.5	0.11	-0.09	0.91 (0.64-1.3)	0.24	0.62	-0.42	0.66 (0.49-0.89)	7.2	0.0074	-0.42	0.66 (0.49-0.89)	7.2	0.0074
T cell recruitment	immune effector cells	GZMM	-0.66	0.52 (0.33-0.81)	8.3	0.004	-0.81	0.45 (0.18-1.1)	3.1	0.08	-0.91	0.4 (0.13-1.2)	2.6	0.11	-0.68	0.51 (0.15-1.7)	1.2	0.27	-1.1	0.32 (0.12-0.88)	4.9	0.027	-1.1	0.32 (0.12-0.88)	4.9	0.027
T cell recruitment	immune effector cells	ITGAX	-0.47	0.62 (0.41-0.94)	5	0.026	-0.77	0.46 (0.2-1.1)	3.2	0.076	-0.31	0.73 (0.27-2)	0.38	0.54	-0.59	0.55 (0.21-1.5)	1.4	0.23	-0.46	0.63 (0.24-1.7)	0.86	0.36	-0.46	0.63 (0.24-1.7)	0.86	0.36
T cell recruitment	immune suppressor cells	CD33	-0.44	0.65 (0.41-1)	3.7	0.053	-0.64	0.53 (0.22-1.3)	2	0.16	-0.67	0.51 (0.17-1.5)	1.5	0.23	-0.12	0.89 (0.32-2.4)	0.05	0.82	-0.51	0.6 (0.21-1.7)	0.92	0.34	-0.51	0.6 (0.21-1.7)	0.92	0.34
T cell recruitment	immune suppressor cells	CD4	-0.45	0.64 (0.48-0.84)	10	0.0013	-0.64	0.53 (0.31-0.88)	5.9	0.015	-0.93	0.4 (0.19-0.83)	6	0.014	-0.29	0.75 (0.36-1.6)	0.6	0.44	-0.56	0.57 (0.31-1.1)	3.2	0.072	-0.56	0.57 (0.31-1.1)	3.2	0.072
T cell recruitment	immune suppressor cells	IL2RA	-0.43	0.65 (0.44-0.95)	4.9	0.026	-0.84	0.43 (0.21-0.88)	5.3	0.021	-1	0.36 (0.12-1.1)	3.2	0.071	-0.48	0.62 (0.21-1.8)	0.76	0.38	-1	0.36 (0.16-0.82)	6	0.015	-1	0.36 (0.16-0.82)	6	0.015
T cell recruitment	immune suppressor cells	ITGAM	-0.23	0.8 (0.65-0.97)	5.1	0.024	-0.37	0.69 (0.47-1)	3.4	0.065	-0.46	0.63 (0.35-1.1)	2.3	0.13	-0.028	0.97 (0.62-1.5)	0.01	0.9	-0.089	0.91 (0.63-1.3)	0.22	0.64	-0.089	0.91 (0.63-1.3)	0.22	0.64
T cell recruitment	immune suppressor cells	MRC1	-0.12	0.89 (0.78-1)	3.5	0.06	-0.091	0.91 (0.72-1.2)	0.57	0.45	-0.35	0.7 (0.49-1)	3.8	0.051	0.08	1.1 (0.79-1.5)	0.25	0.62	-0.15	0.86 (0.65-1.1)	1.2	0.27	-0.15	0.86 (0.65-1.1)	1.2	0.27
